# Supplementary material for: Dietary intake, physical activity and muscle strength among adolescents: the Malaysian Health and Adolescents Longitudinal Research Team (MyHeART) study
Source: PubMed Central journal article supplement — BMJ Open. 2019 Jun 27;9(6):e026275. doi: 10.1136/bmjopen-2018-026275 (PMC6597745; doi:10.1136/bmjopen-2018-026275), 2019-06-27
Supplement: bmjopen-2018-026275.draft_revisions.pdf [file bmjopen-2018-026275.draft_revisions.pdf]

# BMJ Open

BMJ Open is committed to open peer review. As part of this commitment we make the peer review history of every article we publish publicly available.

When an article is published we post the peer reviewers' comments and the authors' responses online. We also post the versions of the paper that were used during peer review. These are the versions that the peer review comments apply to.

The versions of the paper that follow are the versions that were submitted during the peer review process. They are not the versions of record or the final published versions. They should not be cited or distributed as the published version of this manuscript.

BMJ Open is an open access journal and the full, final, typeset and author-corrected version of record of the manuscript is available on our site with no access controls, subscription charges or pay-per-view fees (<http://bmjopen.bmj.com>).

If you have any questions on BMJ Open's open peer review process please email [info.bmjopen@bmj.com](mailto:info.bmjopen@bmj.com)

# BMJ Open

## Dietary intake, physical activity and muscle strength among adolescents: the Malaysian Health and Adolescents Longitudinal Research Team (MyHeART) study

|                               |                                                                                                                                                                                                                                                                                                                                                                                                                                                                                                                                                          |
|-------------------------------|----------------------------------------------------------------------------------------------------------------------------------------------------------------------------------------------------------------------------------------------------------------------------------------------------------------------------------------------------------------------------------------------------------------------------------------------------------------------------------------------------------------------------------------------------------|
| Journal:                      | <i>BMJ Open</i>                                                                                                                                                                                                                                                                                                                                                                                                                                                                                                                                          |
| Manuscript ID                 | bmjopen-2018-026275                                                                                                                                                                                                                                                                                                                                                                                                                                                                                                                                      |
| Article Type:                 | Research                                                                                                                                                                                                                                                                                                                                                                                                                                                                                                                                                 |
| Date Submitted by the Author: | 30-Aug-2018                                                                                                                                                                                                                                                                                                                                                                                                                                                                                                                                              |
| Complete List of Authors:     | Ng, Ai Kah; University of Malaya Faculty of Medicine, Centre for Population Health and Dept of Social and Preventive Medicine; International Medical University School of Health Sciences, Nutrition and Dietetics<br>Hairi, Noran; University of Malaya, JCUM and Dept Social and Preventive Medicine<br>Jalaludin, Muhammad Yazid; University of Malaya, Department of Paediatrics<br>Majid, Hazreen; University of Malaya Faculty of Medicine, Dept of Social and Preventive Medicine; Harvard University T H Chan School of Public Health, Nutrition |
| Keywords:                     | Muscle strength, Hand grip strength, Dietary intake, Adolescents, Physical activity                                                                                                                                                                                                                                                                                                                                                                                                                                                                      |
|                               |                                                                                                                                                                                                                                                                                                                                                                                                                                                                                                                                                          |

SCHOLARONE™  
Manuscripts

1  
2  
3 *Research article*  
4  
5

6 **Dietary intake, physical activity and muscle strength among adolescents: the Malaysian**  
7  
8 **Health and Adolescents Longitudinal Research Team (MyHeART) study**  
9

10  
11  
12  
13  
14 AK Ng<sup>1</sup>, NN Hairi<sup>3</sup>, MY Jalaludin<sup>4</sup>, HA Majid<sup>1,2</sup>  
15  
16

17  
18  
19  
20 <sup>1</sup> Centre for Population Health (CePH), Department of Social and Preventive Medicine, Faculty  
21 of Medicine, University Malaya, 50603 Kuala Lumpur, Malaysia.  
22  
23

24  
25 <sup>2</sup> Department of Nutrition, Harvard Chan School of Public Health, 677 Huntington Avenue,  
26 Boston MA 02115 (present address)  
27  
28

29  
30 <sup>3</sup> Julius Centre University of Malaya (JCUM), Department of Social and Preventive Medicine  
31 Faculty of Medicine, University Malaya, 50603 Kuala Lumpur, Malaysia.  
32  
33

34  
35 <sup>4</sup> Department of Paediatrics, Faculty of Medicine, University Malaya, 50603 Kuala Lumpur,  
36 Malaysia.  
37  
38  
39  
40  
41  
42  
43  
44  
45  
46  
47  
48  
49  
50  
51  
52  
53  
54  
55  
56  
57  
58  
59  
60

1  
2  
3 **Contact number, email addresses and postal addresses for each author:**  
4  
5

6 Noran Naqiah Hairi:

7  
8  
9 Contact no: +603-79674762  
10

11  
12 Email address: [noran@ummc.edu.my](mailto:noran@ummc.edu.my)  
13

14  
15 Postal address: Department of Social and Preventive Medicine, Faculty of Medicine,  
16  
17 University of Malaya, 50603 Kuala Lumpur, Malaysia  
18  
19  
20  
21  
22

23 Muhammad Yazid Jalaludin:

24  
25  
26 Contact no: +603-79492417  
27

28  
29 Email address: [yazidj@ummc.edu.my](mailto:yazidj@ummc.edu.my)  
30

31  
32 Postal address: Department of Paediatrics, Faculty of Medicine, University of Malaya,  
33  
34 50603 Kuala Lumpur, Malaysia  
35  
36  
37  
38  
39

40 Ng Ai Kah:

41  
42  
43 Phd Candidate  
44

45  
46 Contact no: +6017-3846869  
47

48  
49 Email address: [ngaikah@siswa.um.edu.my](mailto:ngaikah@siswa.um.edu.my)  
50

51  
52 Postal address: Department of Social and Preventive Medicine, Faculty of Medicine,  
53  
54 University of Malaya, 50603 Kuala Lumpur, Malaysia  
55  
56  
57  
58  
59

**Corresponding author:**

Majid HA, Associate Professor, PhD, RD, Faculty of Medicine, Department of Social and Preventive Medicine, University of Malaya, Kuala Lumpur, Malaysia

E-mail: [hazreen@ummc.edu.my](mailto:hazreen@ummc.edu.my)

**Word Count**, excluding title page, abstract, references, figures and tables: 3379 words.

**Tables:** 3

**Funding Statement:** This study was supported by funding received from the University Malaya's Research Programme (UMRP022A-14HTM) and Postgraduate Research Fund (PG026-2016A).

**Funding**

University of Malaya Research Grant (UMRP022A-14HTM), UMSC grant cycle 1-2016 and all the school children who participated in this study. The funding bodies did not contribute to the design of the study, data collection, analysis, or interpretation of data.

**Disclosure:** The authors declare that they have no conflict of interests.

1  
2  
3  
4  
5  
6 **Author Contributions/ Statement of authorship:** AK Ng, HA Majid and NN Hairi carried out  
7  
8 the data analysis. AK Ng drafted the manuscript. HA Majid and MY Jalaludin contributed in the  
9  
10 design of the study and data collection. All authors contributed to the final manuscript write up.  
11  
12  
13  
14  
15

### 16 **Ethics approval and consent to participate**

17  
18  
19 Ethical approval was obtained from the Medical Ethics Committee, University Malaya Medical  
20  
21 Centre (MEC Ref. No: 896.34). The National Medical Research Register number is 14-376-  
22  
23 20486. Participation in the study was voluntary and written informed consent and ascent for  
24  
25 participation in the study was obtained from the parents or guardian as well as the participants.  
26  
27  
28  
29  
30  
31  
32  
33  
34  
35  
36  
37  
38  
39  
40  
41  
42  
43  
44  
45  
46  
47  
48  
49  
50  
51  
52  
53  
54  
55  
56  
57  
58  
59  
60

1  
2  
3  
4  
5  
6  
7 **Title: Dietary intake, physical activity and muscle strength among adolescents: the**  
8 **Malaysian Health and Adolescents Longitudinal Research Team (MyHeART) study**  
9

10  
11  
12 **ABSTRACT**  
13

14 **Objective:** To examine the role of dietary intake and physical activity in muscle strength among  
15 adolescents.  
16

17 **Design:** Cross-sectional analysis.  
18

19 **Setting:** The Malaysian Health and Adolescents Longitudinal Research Team (MyHeART)  
20 study.  
21

22 **Participants:** Fifteen-year-old secondary school children who have given consent and who  
23 participated in the MyHeART study in 2014.  
24

25 **Primary outcome measure:** Muscle strength was measured in relation to dietary intake (energy  
26 and macronutrients) and physical activity by using a hand grip dynamometer.  
27

28 **Results:** Among the 1012 participants (395 male; 617 female), the hand grip strength of the  
29 males was higher than that of the females (27.08 kg vs 18.63 kg;  $p<0.001$ ). Also, males were  
30 more active (2.43 vs 2.12;  $p<0.001$ ) and consumed a higher amount energy (2047 kcal vs 1738  
31 kcal,  $p<0.001$ ), carbohydrate (280.71 g vs 229.31 g;  $p<0.001$ ) and protein (75.69 g vs 66.07 g;  
32  $p<0.05$ ). After controlling for ethnicity, place of residency, body mass index (BMI), percentage  
33 body fat and waist circumference, there was a positive relationship between hand grip strength  
34 and the intake of energy ( $r=0.143$ ;  $p=0.005$ ), carbohydrate ( $r=0.158$ ;  $p=0.002$ ) and fat ( $r=0.124$ ;  
35  $p=0.014$ ) and the physical activity score ( $r=0.155$ ;  $p=0.003$ ) for males. However, this relationship  
36 was not observed among females.  
37  
38  
39

40 **Conclusions:** Energy, carbohydrate, fat intake and physical activity score were positively  
41 correlated with hand grip strength in males but not in females.  
42  
43  
44

45 **Keywords:** Muscle strength, Hand grip strength, Dietary intake, Physical activity, Adolescents  
46  
47  
48  
49  
50  
51  
52  
53  
54  
55  
56  
57  
58  
59  
60

## ARTICLE SUMMARY

### Article focus

- Muscle strength, as measured by hand grip strength, is an important indicator of health-related outcomes among adolescents.
- The potential effect of dietary intake on the muscle strength of adolescents is investigated.

### Key messages

- After controlling for ethnicity, place of residency, body mass index, percentage body fat and waist circumference, the results show that greater intake of energy carbohydrate and fat and a higher physical activity score are associated with greater hand grip strength for males. However, this was not observed for females.
- The results also show that energy intake and physical activity score have positive effects on male hand grip strength after controlling for body mass index.

### Strengths and limitations of this study

- The main strengths of this study are that it used a large sample of adolescents and the standardised measurement of muscle strength.
- This study is the first to investigate the association between dietary intake, physical activity and muscle strength among adolescents in Asia.
- The main limitations of this study are that the sample covers a limited age range and the cross-sectional design of the study does not allow any causality interpretations.



## INTRODUCTION

Recent research has paid much attention to poor muscles strength among adolescents and its association with adverse health-related outcomes, including cardiovascular disease,<sup>1</sup> poorer metabolic profile,<sup>2-4</sup> obesity<sup>5 6</sup> and musculoskeletal pain<sup>7</sup> as well as premature death from any cause.<sup>1</sup> A recent study suggested that improving muscular fitness and adhering to the Southern European Atlantic Diet (SEADiet) helps to minimise cardiovascular risk among Portuguese adolescents.<sup>8</sup> The study emphasised the importance of the synergistic effect of a healthy dietary intake on high muscle strength. Another study showed that healthy adolescents who are physically active and have higher cardiorespiratory and higher muscular fitness, have lower adipocytokines.<sup>9</sup> In contrast, a cohort study reported that the findings do not support the idea that low muscle strength is a risk factor for future musculoskeletal pain.<sup>7</sup>

Furthermore, a cross-sectional study among adolescents in a city of southern Brazil reported a prevalence of low muscle strength of 47% among the study population.<sup>10</sup> Moreover, most studies have suggested that there is a declining trend of muscle strength among adolescents over time<sup>11-14</sup> except a study from Columbia in South America<sup>15</sup> that indicated otherwise. The study from Columbia, a middle-income country, also found that, adolescents have a lower hand grip strength compared to those in high-income countries.<sup>15</sup> Similarly, a preliminary finding from the MyHeART study showed that Malaysian adolescents have a lower handgrip strength than those in other countries.<sup>11 16 17</sup> However, it was not possible to categorise hand grip strength of the Malaysian adolescents based on the cutoff values used<sup>10</sup> as there were no available normal values for Asian adolescents. Moreover, the published cutoff values should not be used as the reference standard for Asian populations because most Asian are not able to achieve the published cutoff values.<sup>18</sup>

Issues pertaining to unhealthy dietary intake<sup>19</sup> and low physical activity<sup>20</sup> among adolescents are well documented worldwide. In fact, recent studies have shown that unhealthy dietary intake and/or low physical activity is associated with poor muscle strength status among adolescents.<sup>8 21</sup> However, in respect of the effect of implementing changes to dietary intake and exercise, an experimental study on adolescents showed that milk supplementation together with resistance training does not change body composition.<sup>22</sup> Nevertheless, the study argued that energy intake play a role as a moderator in the relationship between body composition, resistance training and protein intake, which increases muscle mass and strength.<sup>22</sup> According to the result of a cohort study where balanced protein-energy supplementation was given to pregnant women and children less than six years of age and the offspring were later followed up at the adult stage, energy intake and physical activity are positively associated with muscle strength at the adult stage.<sup>23</sup> The cross-sectional study, which was conducted among European adolescents, found that specific amino acids are associated with muscle strength; however, these relationships disappear when carbohydrate is controlled for.<sup>17</sup> Besides studies on the effect of nutrients, some studies

1  
2  
3 have investigated the relationship between the Mediterranean diet and muscle strength. However,  
4 a study on Spanish adolescents found no significant association between muscle strength and  
5 adherence to the Mediterranean diet.<sup>24</sup> Nevertheless, the evidence on the association between the  
6 Mediterranean diet and muscle strength is scarce and inconclusive at this point of time.<sup>25</sup>  
7  
8

9 To date, the relationship between dietary intake, particularly energy and macronutrients, physical  
10 activity and muscle strength among adolescents is not well understood. Moreover, to the best of  
11 our knowledge, only a limited number of studies have investigated the association between  
12 muscle strength, dietary intake and physical activity among adolescents, particularly in Asia.  
13 Therefore, the purpose of this paper is to examine the association between hand grip strength,  
14 dietary intake and physical activity among adolescents in Malaysia.  
15  
16  
17  
18

## 19 **METHODS**

20  
21 This paper is based on secondary analysis of a cross-sectional study derived from the Malaysian  
22 Health and Adolescents Longitudinal Research Team (MyHeART) study. Details of the  
23 MyHeART study protocol have been published previously.<sup>26</sup> In 2014, 1230 adolescents were  
24 recruited for the MyHeART study. Out of the total participants in 2014, 1012 (82.3%) with valid  
25 data on gender, BMI, dietary intake (energy, carbohydrate, protein, fat), hand grip strength and  
26 physical activity score were involved in the analysis for this paper. The MyHeARTs study was  
27 originally approved by the Ethics Committee of the University Malaya Medical Centre (MEC  
28 Ref. No. 896.34).  
29  
30  
31  
32

### 33 **Muscle strength**

34  
35 Hand grip strength has been shown to have moderate to strong validity and high reliability in  
36 tests for upper body and lower body strength in adolescents.<sup>27</sup> Moreover, hand grip strength has  
37 been found to be valid, reliable and feasible for school setting.<sup>28</sup> Therefore muscle strength was  
38 assessed by using hand grip strength. A calibrated hand dynamometer (Jamar, Sammons Preston  
39 Rolyan, Illinois, US), whose unit of measurement is the kilogram, was used in the assessment of  
40 hand grip strength. The strength of the dominant and the non-dominant hand was recorded. Prior  
41 to the measurement, the dynamometer was calibrated. Then, it was adjusted for different hand  
42 sizes. All measurements were done by trained research assistants.  
43  
44  
45  
46  
47

### 48 **Dietary intakes**

49  
50 Dietary intake was assessed by using a 7-day diet history. The diet history is the best method by  
51 which to estimate adolescents' intakes because they can better recall what they have eaten and  
52 drunk and can thus reveal more about their overall intakes.<sup>29</sup> This method also shows less  
53 variation in dietary assessment from the epidemiological perspective<sup>30</sup> and is more representative  
54 of adolescents' habitual intakes than other methods.<sup>31 32</sup> The 7-day diet history was collected by a  
55 qualified dietitian. The *Nutrient Composition of Malaysian Food* (4th edition)<sup>33</sup> was used to  
56  
57  
58  
59  
60

1  
2  
3 calculate energy and macronutrient intakes and the values were entered into the Nutritionist  
4 ProTM database (Axxya Systems, US).<sup>33</sup> The intakes from food items and recipes that could not  
5 be found in the *Nutrient Composition of Malaysian Food* were calculated on the basis of the  
6 details provided by the food packaging and the recipe. These calculations were then entered into  
7 the database by adjusting them based on standard recipes (per serving size). After the diet history  
8 had been analysed, 10% of the data were randomly cross-checked by an independent qualified  
9 dietitian where the margin of error was set at less than 5%.  
10  
11  
12  
13

### 14 **Physical activity score**

15  
16 A Malay version of the validated physical activity questionnaire for older children (PAQ-C)  
17 consisting of 10 items was used to obtain the physical activity level of the adolescents over the  
18 past 7 days. The PAC-Q questionnaire has been shown to be valid and to have good internal  
19 consistency.<sup>34-36</sup> The first item was used to assess the type and frequency of sports and/or dance  
20 activities that the adolescents performed. The second to eighth were used to assess the activity of  
21 the adolescents during physical education classes, recess, lunchtime, immediately after school, in  
22 the evenings, at the weekend and leisure time. A five-point Likert scale [1 (lowest) to 5  
23 (highest)] was used for the second to eighth items. The ninth item was used to assess their  
24 physical activity frequency. The tenth item was used to gather information on any unusual  
25 activities that the adolescents undertook during those 7 days. The results obtained from the PAQ-  
26 C were categorised following Crocker et al into low (<2.33), moderate (2.33-3.66) and high  
27 (>3.66).<sup>37</sup>  
28  
29  
30  
31  
32  
33

### 34 **Anthropometric measures**

35  
36 Body weight was measured using a digital electronic weighing scale (Seca 813, Seca, UK) and  
37 recorded to the nearest 0.1 kg. Height was measured without socks and shoes by using a  
38 calibrated vertical stadiometer (Seca Portable 217, Seca, UK) and recorded to the nearest 0.1 cm.  
39 Body mass index was calculated as weight in kilograms divided by the square of height in  
40 metres. Waist circumference (midpoint between the lowest rib margin and the iliac crest) was  
41 measured by using a non-elastic measuring tape (Seca 201, Seca, UK) and recorded to the  
42 nearest 0.1 cm. Percentage body fat was measured by using a bioelectric impedance analyser  
43 (SC-240, Body Composition Analyser, Tanita Europe BV, The Netherlands).  
44  
45  
46  
47

### 48 **Sociodemographic measures**

49  
50 Sociodemographic measures were collected via parental and student questionnaires which  
51 included questions on age, ethnicity and place of residency.  
52  
53  
54

### 55 **Statistical analyses**

Analyses were performed using the Statistical Package for Social Sciences software for Windows (version 22.0 Chicago, IL, US) and the significance level was set at  $p < 0.05$ . The analyses were performed separately by gender. Normality and skewness tests were used to assess normal distribution. All variables showed a normal distribution, except for weight, waist circumference and BMI. Data were presented as means and standard deviations for normally distributed continuous variables, medians and interquartile ranges (IQRs) for non-normally distributed continuous variables and percentages for categorical variables. The independent t-test was used to examine gender differences for normally distributed variables and the Mann-Whitney U test was used for non-normally distributed variables. The association between hand grip strength and (i) energy intake, (ii) macronutrient intake and (iii) physical activity score were assessed by using Pearson's correlation coefficient. The hand grip strength of the dominant hand was entered as the dependent variable and (i) energy and macronutrient intake and (ii) physical activity score were entered as the independent variables while controlling for ethnicity, place of residency, BMI, percentage body fat and waist circumference. In addition, linear regression was used to investigate whether dietary intake and physical activity could predict hand grip strength when controlling for ethnicity, place of residency and BMI.

### **Patient and public involvement**

Information sheet and consent forms were given to the students and their parents/guardian prior to the recruitment. Participation into the study was based on a voluntarily basis. Feasibility study was done prior to the actual study and the findings had assisted in the flow of the actual study and data collection. Each participant was given a record book whereby the relevant results such as weight, height and hand grip strength were recorded.

## **RESULTS**

### **Descriptive analysis**

Of the 1012 participants, 395 were male and 617 were female. The study population was predominantly Malay (78.6%) followed by Indian (8.8%), Chinese (7.2%) and others (5.5%). At this stage of the MyHeART study, the majority of the participants had reached puberty (data not shown). The majority of the participants were right-hand dominant (90%) and the remainder were left-hand dominant (data not shown).

Table 1 provides the characteristics of the participants. It can be seen that males had significantly higher values than females in terms of weight, physical activity score, hand grip strength of both hands, energy, protein and carbohydrate intake per day, but not percentage body fat and BMI ( $p < 0.05$ ). Among the females, about two thirds (69.2%) had a low physical activity score, whereas almost two thirds of the males (65.2%) had a moderate to high physical activity score.

### Correlation and regression

Table 2 shows that a positive linear relationship was found between energy, carbohydrate, and fat intakes and physical activity score with hand grip strength ( $p < 0.001$ ) among males. This result is statistically significant. However, no such correlation was found for females.

To investigate whether dietary intake and physical activity could predict hand grip strength, a linear regression was computed when controlling for ethnicity, place of residency and BMI. Before running the regressions, the assumptions of linearity, normally distributed errors and non-correlated errors were checked and met. When BMI was entered alone, it was found to significantly predict hand grip strength:  $F(1, 393) = 58.09$ ,  $p < 0.001$ , adjusted  $R^2 = 0.127$ . Only 12.7% of the variance in hand grip strength could be predicted by knowing the adolescent's BMI. When the physical activity score and energy intakes were added, the prediction improved slightly:  $R^2 = 0.04$ ,  $F(2, 391) = 9.216$ ,  $p < 0.001$ . Moreover, the entire group of variables significantly predicted hand grip strength:  $F(3, 391) = 26.32$ ,  $p < 0.001$ , adjusted  $R^2 = 0.16$  (Table 3).

**Table 1: Characteristics of MyHeART participants**

|                                             | <b>Male</b><br><b>(n=395)</b> | <b>Female</b><br><b>(n=617)</b> | <b>All</b><br><b>(n=1012)</b> | <b><i>p</i></b> |
|---------------------------------------------|-------------------------------|---------------------------------|-------------------------------|-----------------|
| <b>Age (y)</b>                              | 15.04 (±0.198)                | 15.04 (±0.205)                  | 15.04 (±0.202)                | 0.384           |
| <b>Ethnicity</b>                            |                               |                                 |                               |                 |
| Malay                                       | 307 (77.7%)                   | 487 (78.9%)                     | 795 (78.6%)                   |                 |
| Chinese                                     | 26 (6.6%)                     | 47 (7.6%)                       | 73 (7.2%)                     |                 |
| Indian                                      | 35 (8.9%)                     | 54 (8.8%)                       | 89 (8.8%)                     |                 |
| Others                                      | 27 (6.8%)                     | 29 (4.7%)                       | 56 (5.5%)                     |                 |
| <b>Place of residency</b>                   |                               |                                 |                               |                 |
| Urban                                       | 216 (54.7%)                   | 367 (59.5%)                     | 583 (57.6%)                   |                 |
| Rural                                       | 179 (45.3%)                   | 250 (40.5%)                     | 429 (42.4%)                   |                 |
| <b>Weight<sup>a</sup> (kg)</b>              | <i>51.00 (17.00)</i>          | <i>48.50 (15.35)</i>            | <i>49.50 (15.60)</i>          | <0.001*         |
| <b>Height (cm)</b>                          | 163.20 (±6.76)                | 154.65 (±5.67)                  | 157.99 (±7.40)                | 0.052           |
| <b>BMI<sup>a</sup> (kg/m<sup>2</sup>)</b>   | <i>18.90 (5.49)</i>           | <i>20.25 (5.74)</i>             | <i>19.74 (5.73)</i>           | <0.001*         |
| <b>% body fat</b>                           | 15.50 (±11.02)                | 29.37 (±9.17)                   | 23.95 (±12.01)                | <0.001*         |
| <b>Waist circumference<sup>a</sup> (cm)</b> | <i>67.90 (15.50)</i>          | <i>69.00 (13.50)</i>            | <i>68.50 (14.00)</i>          | 0.514           |

Differences between male and female participants were determined using an independent t-test and the Mann-Whitney test. Data are presented as means  $\pm$  standard deviation or as n (%), unless otherwise stated.

\*Statistically significant at a level of significance of  $p < 0.05$ .

<sup>a</sup>Values are expressed as medians (IQRs).

**Table 1: Characteristics of MyHeART participants (cont...)**

|                                                 | <b>Male</b>           | <b>Female</b>         | <b>All</b>            | <b><i>p</i></b> |
|-------------------------------------------------|-----------------------|-----------------------|-----------------------|-----------------|
|                                                 | <b>(n=395)</b>        | <b>(n=617)</b>        | <b>(n=1012)</b>       |                 |
| <b>Physical activity score</b>                  | 2.43 ( $\pm$ 0.75)    | 2.12 ( $\pm$ 0.54)    | 2.24 ( $\pm$ 0.65)    | <0.001*         |
| <b>Physical activity level</b>                  |                       |                       |                       |                 |
| low (<2.33)                                     | 177 (44.8%)           | 427 (69.2%)           | 604 (59.7%)           |                 |
| moderate (2.33-3.66)                            | 199 (50.4%)           | 183 (29.7%)           | 382 (37.7%)           |                 |
| high (>3.66)                                    | 19 (4.8%)             | 7 (1.1%)              | 26 (2.6%)             |                 |
| <b>Hand grip strength (kg)</b>                  |                       |                       |                       |                 |
| Average hand grip strength (left) (kg)          | 25.95 ( $\pm$ 7.27)   | 17.54 ( $\pm$ 4.78)   | 20.82 ( $\pm$ 7.16)   | <0.001*         |
| Average hand grip strength (right) (kg)         | 27.08 ( $\pm$ 7.27)   | 18.63 ( $\pm$ 4.59)   | 21.93 ( $\pm$ 7.10)   | <0.001*         |
| Average hand grip strength (dominant hand) (kg) | 27.25 ( $\pm$ 7.16)   | 18.73 ( $\pm$ 4.63)   | 22.06 ( $\pm$ 7.09)   | <0.001*         |
| <b>Energy &amp; macronutrients intake</b>       |                       |                       |                       |                 |
| Energy (kcal)                                   | 2047 ( $\pm$ 583)     | 1738 ( $\pm$ 474)     | 1858 ( $\pm$ 540)     | 0.001*          |
| Protein (g)                                     | 75.69 ( $\pm$ 22.48)  | 66.07 ( $\pm$ 19.45)  | 69.82 ( $\pm$ 21.20)  | 0.04*           |
| Carbohydrate (g)                                | 280.71 ( $\pm$ 90.17) | 229.31 ( $\pm$ 67.79) | 249.37 ( $\pm$ 81.23) | <0.001*         |



Fat (g) 68.97 ( $\pm 21.74$ ) 61.60 ( $\pm 20.13$ ) 64.48 ( $\pm 21.07$ ) 0.16

Differences between male and female participants were determined using an independent t-test and the Mann-Whitney test. Data are presented as means  $\pm$  standard deviation or as n (%), unless otherwise stated.

\*Statistically significant at a level of significance of  $p < 0.05$ .

<sup>a</sup>Values are expressed as medians (IQRs).

**Table 2: Partial correlation (r) between dietary intake, physical activity score and hand grip strength in adolescents**

|                                         | Hand grip strength for males*<br>(n = 395) |         | Hand grip strength for females*<br>(n = 617) |       |
|-----------------------------------------|--------------------------------------------|---------|----------------------------------------------|-------|
|                                         | r                                          | P       | r                                            | p     |
| <b>Energy and macronutrients intake</b> |                                            |         |                                              |       |
| Energy (kcal)                           | 0.143                                      | 0.005** | 0.012                                        | 0.770 |
| Protein (g)                             | 0.041                                      | 0.420   | 0.027                                        | 0.512 |
| Carbohydrate (g)                        | 0.158                                      | 0.002** | 0.020                                        | 0.624 |
| Fat (g)                                 | 0.124                                      | 0.014** | -0.007                                       | 0.859 |
| <b>Physical activity score</b>          | 0.155                                      | 0.002** | 0.037                                        | 0.358 |

\*Controlled for ethnicity, place of residency, BMI, percentage body fat and waist circumference

\*\*Statistically significant at a level of significance of  $p < 0.05$ .

**Table 3: Multiple linear regression model for male adolescents**

|                                | Hand grip strength for male<br>(n = 395) |         |        |
|--------------------------------|------------------------------------------|---------|--------|
|                                | R <sup>2</sup>                           | $\beta$ | p      |
|                                | 0.166                                    |         |        |
| <b>Energy intake (kcal)</b>    |                                          | 0.120   | 0.011* |
| <b>Physical activity score</b> |                                          | 0.150   | 0.001* |

\*Controlled for ethnicity, place of residency and BMI



## DISCUSSION

### Hand grip strength, dietary intake and physical activity

Our study has shown that the muscle strength of Malaysian adolescent was much lower than their counterparts as reported by studies from Europe, United Kingdom and Columbia of South America.<sup>11 17 38</sup> In fact, our Malaysian female adolescents have lower muscle strength than those in Beijing, China.<sup>39</sup> Unfortunately, there is no large population based Asian male adolescents' data with which to compare with our results. Hence, this is the first documented muscle strength study among adolescents for both genders in Asia region. Nevertheless, this trend is similar to that reported in a study on the Malaysian adult population, which found the hand grip strength of Malaysian adults is 1.5 times lower than those in western countries.<sup>40</sup> Thus our finding may indicate that the muscle strength among the Malaysian population is relatively low from a young age. Indeed, the results of a longitudinal study conducted in Quebec, a province in eastern Canada, which tracked muscle strength from childhood to adulthood, suggested that low muscle strength can persist from childhood to adolescence.<sup>41</sup> Therefore, it is worth to have early detection of low muscle strength and build up muscle strength from a young age in which may have favourable health outcomes in later life.<sup>1</sup> Thus, it can be argued that low muscle strength among adolescents warrants particular attention in order to identify the root cause, and especially if there is an association with dietary intake and physical activity which are modifiable health-related behaviours.

Our results also showed that differences in hand grip strength, dietary intake and physical activity score varied between male and female adolescents. The males had higher muscle strength, consumed more energy, protein and carbohydrate and were more physically active than their female counterparts. These findings are consistent with those of previous studies conducted on study populations aged 13 years-old.<sup>16 42 43</sup>

### Association between dietary intake, physical activity and hand grip strength

In our study, energy, carbohydrate, and fat intakes and physical activity score were positively correlated with hand grip strength for males. However, protein was not found to be correlated with hand grip strength. This result is similar to that reported by Gracia-Marco et al. whereby the researchers used the German Food Code and Nutrition Data Base, which have the breakdown of amino acids profile in order to quantify the intake of amino acids.<sup>17</sup> The study showed that

1  
2  
3 tryptophan, histidine and methionine (amino acids) are positively correlated with lower limb  
4 muscular strength, however, these relationships disappeared when carbohydrate intakes is  
5 controlled for.<sup>17</sup> According to the study, specific macronutrients such as carbohydrate play a  
6 much more important role than protein or physical activity in muscle strength. One possible  
7 explanation for this is that higher carbohydrate intake increases intravenous infusion of insulin,  
8 which results in hyperinsulinemia, which, in turn, enhances the rate of muscle protein  
9 synthesis.<sup>44</sup>  
10  
11  
12  
13  
14  
15

16  
17 In addition, studies have also reported that energy plays as a moderating role in muscle  
18 strength.<sup>22 23</sup> Although a study that used milk supplementation and resistance training as an  
19 intervention did not improve muscle mass, the researchers argued that energy plays a mediator  
20 role in the relationship between muscle mass, protein intake and resistance training despite the  
21 finding showing otherwise.<sup>22</sup> Therefore, a sufficient intake of energy and/or carbohydrate to meet  
22 the daily requirement needs is required before protein can play a role in promoting muscle  
23 building and strength.  
24

25  
26 When the energy intake per day and physical activity score were put into the model while  
27 controlling for BMI, both predictors remained significantly associated with hand grip strength.  
28 We found that higher energy intake and higher physical activity score predicted higher hand grip  
29 strength. We also found that higher BMI predicted higher hand grip strength. The latter finding is  
30 consistent with that reported by a study on Southern Brazil adolescents, which found that the  
31 higher the BMI the greater the muscle strength.<sup>21</sup> The researchers stated that their study  
32 population had a higher body mass, particularly muscle. As our study did not include an  
33 objective measure for muscle mass, we considered body fat percentage and found that the male  
34 participants had a lower body fat percentage than the female. In addition, the average BMI of the  
35 male participants was below the overweight level using International Obesity Task Force (IOTF)  
36 reference. Nevertheless, BMI is not generally seen as a good indicator of body composition.<sup>45</sup> On  
37 the other hand, there is a general consensus that the higher the body fat, especially abdominal fat,  
38 the lower the hand grip strength.<sup>5</sup> This could be due to fat playing an inert role in muscle  
39 strength.<sup>46</sup> In contrast to the above-mentioned studies, a study conducted in Italy on a sample of  
40 2411 adolescents produced a neutral result, which suggested that obesity does not affect muscle  
41 strength among healthy schoolchildren.<sup>47</sup> Nonetheless, our predictive equation needs to be  
42 interpreted cautiously as it only explains about 16.6% variations in muscle strength are explained  
43 by energy intake and physical activity.  
44  
45  
46  
47  
48

49 In our study, no relationship was found between dietary intake, physical activity score and hand  
50 grip strength among female adolescents. Again, this result is similar to that reported by Gracia-  
51 Marco et al.<sup>17</sup> The study showed that proline (amino acids) is positively correlated with lower  
52 limb muscular strength, however, these relationships disappeared when carbohydrate intakes is  
53 controlled for.<sup>17</sup> On the other hand, a study conducted among Kenya adolescents suggested that  
54 female adolescents have greater muscle strength than their male counterparts because the females  
55  
56  
57  
58  
59  
60

1  
2  
3 undertake more house chores such as transferring water from deep wells and preparing meals,  
4 thus, have greater access to food than the males.<sup>48</sup> All these activities eventually help to build  
5 upper limb muscle strength. However, these conditions are not commonly found in Malaysia  
6 where most adolescents are school attendees. We would postulate that the reason for our finding  
7 that female adolescents have lower muscle strength than males is because almost 70% of the  
8 females had a low physical activity score due to a predominantly sedentary lifestyle as compared  
9 to males 65% of whom had a moderate to high physical activity score. It has also been found by  
10 a previous study that females already have a lower physical activity score at an earlier age  
11 compared to males<sup>42</sup> and that this continues as they age.  
12  
13  
14  
15  
16

17 Another possible reason for the significant result observed in males but not females could be due  
18 to changes with puberty stage, where the hand grip strength of males increases tremendously as  
19 compared to females. A study has reported that at 13 years old, the hand grip strength of males  
20 and females is 17.8 kg and 14.7 kg, respectively<sup>16</sup>. Muscle hypertrophy is commonly found in  
21 pre-adolescent males compared with females at the same growth stage because of increasing  
22 levels of circulating androgens.<sup>49</sup> Moreover, it has also been found that muscle strength increases  
23 when a male reaches puberty, which it has been argued is related to the growth spurt due to the  
24 direct action of testosterone, which has a direct anabolic effect on muscle fibers.<sup>50</sup> In our study  
25 population, the majority of the males had reached the puberty stage. Thus, in addition to the  
26 males being moderately to highly physically active, the presence of testosterone could explain  
27 the marked difference in muscle strength between the male and female participants.  
28  
29  
30  
31  
32

33 Although the role of protein in muscle strength was not statistically significant in our study, it is  
34 still crucial to explore the effect of dietary protein as it is known to play a role in ensuring  
35 appropriate growth during adolescence.<sup>17</sup> Furthermore, muscle building only occurs when a  
36 person is physically active because such activity triggers the digestion and better absorption of  
37 amino acids,<sup>51 52</sup> which eventually increases muscle strength. Moreover, it is crucial to ensure  
38 that energy and carbohydrate intake requirements are met before protein can even play a role in  
39 improving muscle strength. The above findings therefore indicate that there is a strong need to  
40 undertake a longitudinal study to explore whether changes in dietary intake have an impact on  
41 hand grip strength among adolescents, and that takes into account the variables of physical  
42 activity and weight status.  
43  
44  
45  
46  
47

### 48 **Strengths and limitations**

49

50 This study has a number of strengths. Firstly, it was conducted using a large sample of  
51 adolescents. Secondly, it used objective measurements with standard protocols for hand grip  
52 strength, dietary intake and physical activity, which ensured minimal measurement bias.  
53 Moreover, to the best of our knowledge, this study may be the first to investigate the association  
54 between hand grip strength, dietary intake and physical activity among adolescents in Asia.  
55  
56  
57  
58  
59  
60

1  
2  
3 However, it should be noted that this study is somewhat limited because it was cross-sectional in  
4 design, so the presence or otherwise of a causal relationship could not be established. In addition,  
5 the sample covered a narrow age range.  
6  
7  
8

## 9 CONCLUSION

10  
11 Our findings suggest that muscle strength is associated with energy intake and physical activity  
12 among males. However, this relationship was not found in females. This difference requires  
13 further investigation in order to gain a better understanding of the issues affecting muscle  
14 strength so as to improve the provision of nutritional and physical activity strategies for the  
15 adolescent muscular health of both genders.  
16  
17

## 18 ABBREVIATIONS

19  
20 **BMI**            Body Mass Index

21  
22 **IQR**            Interquartile range  
23  
24  
25

26 **Acknowledgments:** The authors would like to thank Associate Professor Dr. Mohd Nahar Azmi  
27 Mohamed and Dr. 'Abqariyah Binti Yahya for the support and guidance.  
28  
29  
30

31 **Contributors:** AK Ng, HA Majid and NN Hairi carried out the data analysis. AK Ng drafted the  
32 manuscript. HA Majid and MY Jalaludin contributed in the design of the study and data  
33 collection. All authors contributed to the final manuscript write up.  
34  
35  
36

37 **Funding:** This study was supported by funding received from the University Malaya's Research  
38 Programme (UMRP022A-14HTM) and Postgraduate Research Fund (PG026-2016A).  
39  
40  
41

42 **Competing interests:** None.  
43  
44  
45

46 **Ethical approval:** Ethics Committee of the University Malaya Medical Centre (MEC Ref. No.  
47 896.34).  
48  
49  
50

51 **Data sharing statement:** No additional data are available.  
52  
53  
54  
55  
56  
57  
58  
59  
60

## REFERENCES

1. Ortega FB, Silventoinen K, Tynelius P, et al. Muscular strength in male adolescents and premature death: cohort study of one million participants. *BMJ* 2012;345:e7279.
2. Cohen D, López-Jaramillo P, Fernández-Santos J, et al. Muscle strength is associated with lower diastolic blood pressure in schoolchildren. *Preventive medicine* 2017;95:1-6.
3. Steene-Johannessen J, Anderssen SA, Kolle E, et al. Low muscle fitness is associated with metabolic risk in youth. *Med Sci Sports Exerc* 2009;41(7):1361-7. doi: 10.1249/MSS.0b013e31819aaae5
4. Blakeley CE, Van Rompay MI, Schultz NS, et al. Relationship between muscle strength and dyslipidemia, serum 25 (OH) D, and weight status among diverse schoolchildren: a cross-sectional analysis. *BMC pediatrics* 2018;18(1):23.
5. Ruiz JR, Castro-Pinero J, Artero EG, et al. Predictive validity of health-related fitness in youth: a systematic review. *Br J Sports Med* 2009;43(12):909-23. doi: 10.1136/bjsm.2008.056499
6. Thivel D, Ring-Dimitriou S, Weghuber D, et al. Muscle Strength and Fitness in Pediatric Obesity: a Systematic Review from the European Childhood Obesity Group. *Obes Facts* 2016;9(1):52-63. doi: 10.1159/000443687
7. Timpka S, Petersson IF, Zhou C, et al. Muscle strength in adolescent men and future musculoskeletal pain: a cohort study with 17 years of follow-up. *BMJ Open* 2013;3(5) doi: 10.1136/bmjopen-2013-002656
8. Agostinis-Sobrinho C, Abreu S, Moreira C, et al. Muscular fitness, adherence to the Southern European Atlantic Diet and cardiometabolic risk factors in adolescents. *Nutrition, Metabolism and Cardiovascular Diseases* 2017;27(8):695-702.
9. Martinez-Gomez D, Eisenmann JC, Gomez-Martinez S, et al. Associations of physical activity and fitness with adipocytokines in adolescents: the AFINOS Study. *Nutrition, Metabolism and Cardiovascular Diseases* 2012;22(3):252-59.
10. Silva DAS, Pelegrini A, Chula de Castro JA, et al. Low handgrip strength levels among adolescents in a city in Southern Brazil. *Journal of Bodywork & Movement Therapies* 2017 doi: <http://dx.doi.org/10.1016/j.jbmt.2017.03.004>
11. Cohen DD, Voss C, Taylor MJ, et al. Ten-year secular changes in muscular fitness in English children. *Acta Paediatr* 2011;100(10):e175-7. doi: 10.1111/j.1651-2227.2011.02318.x
12. Dos Santos FK, Prista A, Gomes TN, et al. Secular trends in physical fitness of Mozambican school-aged children and adolescents. *Am J Hum Biol* 2015;27(2):201-6. doi: 10.1002/ajhb.22638
13. Huotari PR, Nupponen H, Laakso L, et al. Secular trends in muscular fitness among Finnish adolescents. *Scand J Public Health* 2010;38(7):739-47. doi: 10.1177/1403494810384425

14. Silverman IW. The secular trend for grip strength in Canada and the United States. *J Sports Sci* 2011;29(6):599-606. doi: 10.1080/02640414.2010.547209
15. Otero J, Cohen DD, Herrera VM, et al. Sociodemographic factors related to handgrip strength in children and adolescents in a middle income country: The SALUS study. *Am J Hum Biol* 2016;29(1) doi: 10.1002/ajhb.22896
16. Majid HA, Noran H, Jalaludin MY, et al. Poster Communications ICD Granada 2016. 17th International Congress of Dietetics 2016. Granada, Spain: Spanish Journal of Human Nutrition and Dietetics, 2016.
17. Gracia-Marco L, Bel-Serrat S, Cuenca-Garcia M, et al. Amino acids intake and physical fitness among adolescents. *Amino Acids* 2017;49(6):1041-52. doi: 10.1007/s00726-017-2393-6
18. Anjum SN, Choudary P, Dimri R, et al. Comparative evaluation of grip and pinch strength in an Asian and European population. *Hand Therapy* 2012;17(1):11-14. doi: 10.1258/ht.2011.011023
19. Keats E, C., Aviva I, Rappaport, Reena Jain, et al. Diet and Eating Practices among Adolescent Girls in Low- and Middle-Income Countries: A Systemic Review. Arlington, VA: Strengthening Partnerships, Results, and Innovations in Nutrition Globally (SPRING) project., 2017.
20. World Health Organization W. Prevalence of insufficient physical activity 2018 [cited 2018 13/7/2018]. Available from: [http://www.who.int/gho/ncd/risk\\_factors/physical\\_activity\\_text/en/](http://www.who.int/gho/ncd/risk_factors/physical_activity_text/en/) accessed 13/7/2018 2018.
21. Silva DAS, Martins PC. Impact of physical growth, body adiposity and lifestyle on muscular strength and cardiorespiratory fitness of adolescents. *Journal of Bodywork and Movement Therapies* 2017 doi: 10.1016/j.jbmt.2017.01.007
22. Lambourne K, Washburn R, Lee J, et al. A 6-month trial of resistance training with milk supplementation in adolescents: effects on body composition. *International journal of sport nutrition and exercise metabolism* 2013;23(4):344-56.
23. Kulkarni B, Kuper H, Radhakrishna KV, et al. The association of early life supplemental nutrition with lean body mass and grip strength in adulthood: evidence from APCAPS. *Am J Epidemiol* 2014;179(6):700-9. doi: 10.1093/aje/kwt332
24. Grao-Cruces A, Fernández-Martínez A, Nuviala A. Association of fitness with life satisfaction, health risk behaviors, and adherence to the Mediterranean diet in Spanish adolescents. *The Journal of Strength & Conditioning Research* 2014;28(8):2164-72.
25. Craig JV, Bunn DK, Hayhoe RP, et al. Relationship between the Mediterranean dietary pattern and musculoskeletal health in children, adolescents, and adults: systematic review and evidence map. *Nutrition reviews* 2017;75(10):830-57.
26. Hazreen MA, Su TT, Jalaludin MY, et al. An exploratory study on risk factors for chronic non-communicable diseases among adolescents in Malaysia: overview of the Malaysian Health and Adolescents Longitudinal Research Team study (The MyHeART study). *BMC Public Health* 2014;14 Suppl 3:S6. doi: 10.1186/1471-2458-14-S3-S6
27. Wind AE, Takken T, Helders PJ, et al. Is grip strength a predictor for total muscle strength in healthy children, adolescents, and young adults? *Eur J Pediatr* 2010;169(3):281-7. doi: 10.1007/s00431-009-1010-4
28. Pillsbury L, Oria M, Pate R. Fitness measures and health outcomes in youth: National Academies Press 2013.
29. Burrows TL, Martin RJ, Collins CE. A systematic review of the validity of dietary assessment methods in children when compared with the method of doubly labeled water. *J Am Diet Assoc* 2010;110(10):1501-10. doi: 10.1016/j.jada.2010.07.008
30. Willett W. Nutritional epidemiology: Oxford University Press 2012.



- 1
- 2
- 3
- 4 31. Livingstone MB, Prentice AM, Coward WA, et al. Validation of estimates of energy intake by weighed
- 5 dietary record and diet history in children and adolescents. *The American journal of clinical*
- 6 *nutrition* 1992;56(1):29-35.
- 7 32. Livingstone MBE, Robson PJ, Wallace JMW. Issues in dietary intake assessment of children and
- 8 adolescents. *British Journal of Nutrition* 2004;92(S2):S213-S22.
- 9 33. Tee ES, Noor MI, Azudin MN, et al. The Nutrient Composition of Malaysian Food (4th edition)1997.
- 10 34. Kowalski KC, Crocker PR, Faulkner RA. Validation of the physical activity questionnaire for older
- 11 children. *Pediatric exercise science* 1997;9(2):174-86.
- 12 35. Dan S, Mohd N, Zalilah M. Determination of factors associated with physical activity levels among
- 13 adolescents attending school in Kuantan, Malaysia. *Malays J Nutr* 2011;17(2):175-817.
- 14 36. Nor Aini J, Poh BK, Chee WSS. Validity of a children's physical activity questionnaire (cPAQ) for the
- 15 study of bone health. *Pediatrics International* 2013;55(2):223-28.
- 16 37. Crocker P, Bailey DA, Faulkner RA, et al. Measuring general levels of physical activity: preliminary
- 17 evidence for the Physical Activity Questionnaire for Older Children. *Medicine and science in*
- 18 *sports and exercise* 1997;29(10):1344-49.
- 19 38. Sandercock GR, Lobelo F, Correa-Bautista JE, et al. The relationship between socioeconomic status,
- 20 family income, and measures of muscular and cardiorespiratory fitness in Colombian
- 21 schoolchildren. *The Journal of pediatrics* 2017;185:81-87. e2.
- 22 39. Foo LH, Zhang Q, Zhu K, et al. Low vitamin D status has an adverse influence on bone mass, bone
- 23 turnover, and muscle strength in Chinese adolescent girls. *J Nutr* 2009;139(5):1002-7. doi:
- 24 10.3945/jn.108.102053
- 25 40. Kamarul T, Ahmad TS, Loh W. Hand grip strength in the adult Malaysian population. *Journal of*
- 26 *Orthopaedic Surgery* 2006;14(2):172-77.
- 27 41. Trudeau F, Shephard RJ, Arsenaault F, et al. Tracking of physical fitness from childhood to adulthood.
- 28 *Canadian Journal of Applied Physiology* 2003;28(2):257-71.
- 29 42. Su TT, Sim PY, Nahar AM, et al. Association between self-reported physical activity and indicators of
- 30 body composition in Malaysian adolescents. *Prev Med* 2014;67:100-5. doi:
- 31 10.1016/j.ypmed.2014.07.001
- 32 43. Abdul Majid H, Ramli L, Ying SP, et al. Dietary Intake among Adolescents in a Middle-Income Country:
- 33 An Outcome from the Malaysian Health and Adolescents Longitudinal Research Team Study (the
- 34 MyHeARTs Study). *PLoS One* 2016;11(5):e0155447. doi: 10.1371/journal.pone.0155447
- 35 44. Gower BA, Goss AM. A Lower-Carbohydrate, Higher-Fat Diet Reduces Abdominal and Intermuscular
- 36 Fat and Increases Insulin Sensitivity in Adults at Risk of Type 2 Diabetes-3. *The Journal of*
- 37 *nutrition* 2014;145(1):177S-83S.
- 38 45. Freedman DS, Sherry B. The validity of BMI as an indicator of body fatness and risk among children.
- 39 *Pediatrics* 2009;124(Supplement 1):S23-S34.
- 40 46. Tomlinson DJ, Erskine RM, Morse CI, et al. The impact of obesity on skeletal muscle strength and
- 41 structure through adolescence to old age. *Biogerontology* 2016;17(3):467-83. doi:
- 42 10.1007/s10522-015-9626-4
- 43 47. Ceschia A, Giacomini S, Santarossa S, et al. Deleterious effects of obesity on physical fitness in pre-
- 44 pubertal children. *European Journal of Sport Science* 2015;16:1-8. doi:
- 45 10.1080/17461391.2015.1030454
- 46 48. Little MA. Grip strength and body composition in Turkana pastoralist children and adolescents.
- 47 *American Journal of Human Biology* 2017;29(2):e22922. doi: doi:10.1002/ajhb.22922
- 48 49. Faigenbaum AD, Kraemer WJ, Blimkie CJ, et al. Youth resistance training: updated position statement
- 49 paper from the national strength and conditioning association. *The Journal of Strength &*
- 50 *Conditioning Research* 2009;23:S60-S79.
- 51
- 52
- 53
- 54
- 55
- 56
- 57
- 58
- 59
- 60

- 1  
2  
3 50. McComas A, Sica R, Petito F. Muscle strength in boys of different ages. *Journal of Neurology,*  
4 *Neurosurgery & Psychiatry* 1973;36(2):171-73.  
5 51. Wu G. Dietary protein intake and human health. *Food & function* 2016;7(3):1251-65.  
6 52. Strasser B, Volaklis K, Fuchs D, et al. Role of Dietary Protein and Muscular Fitness on Longevity and  
7 *Aging. Aging and Disease* 2018;9(1):119-32. doi: 10.14336/AD.2017.0202  
8  
9  
10  
11  
12  
13  
14  
15  
16  
17  
18  
19  
20  
21  
22  
23  
24  
25  
26  
27  
28  
29  
30  
31  
32  
33  
34  
35  
36  
37  
38  
39  
40  
41  
42  
43  
44  
45  
46  
47  
48  
49  
50  
51  
52  
53  
54  
55  
56  
57  
58  
59  
60

For peer review only



## PROCEEDINGS

## Open Access

# An exploratory study on risk factors for chronic non-communicable diseases among adolescents in Malaysia: overview of the Malaysian Health and Adolescents Longitudinal Research Team study (The MyHeART study)

Majid Abdul Hazreen<sup>1\*</sup>, Tin Tin Su<sup>1</sup>, Muhammad Yazid Jalaludin<sup>2</sup>, Maznah Dahlui<sup>1</sup>, Karuthan Chinna<sup>3</sup>, Maslinor Ismail<sup>1</sup>, Liam Murray<sup>4</sup>, Marie Cantwell<sup>4</sup>, Nabilla Al Sadat<sup>1</sup>, MyHeART Study Group<sup>1</sup>

From International Research Symposium on Population Health 2013  
Kuala Lumpur, Malaysia. 18-22 November 2013

## Abstract

**Background:** The National Health & Morbidity Survey (NHMS) IV (2011) observed that the prevalence of obese children aged less than 18 years in Malaysia is 6.1% compared to 5.4% overweight and obese in NHMS III (2006). As such, this observation is of public health importance as obesity is a forewarning risk factor for chronic diseases such as type-2 diabetes, cardiovascular diseases (CVD) and certain types of cancers. This MyHeART (Malaysian Health and Adolescents longitudinal Research Team) study aims to examine risk factors of non-communicable diseases (NCD) among adolescents.

**Methods/design:** The MyHeART study is longitudinal cohort study of 1361 schoolchildren (13-years old) attending 15 public secondary schools from the central (Kuala Lumpur and Selangor) and northern (Perak) regions of Peninsular Malaysia. The study used a stratified sampling design to select the study participants. Data collected at baseline included socio-economic, lifestyle (e.g. smoking, physical activity assessment, fitness assessment, seven-day diet history), and environmental information, anthropometric measurements, blood pressure, handgrip strength and bone mineral density. Blood samples for fasting blood glucose and lipid profiles, full blood count, renal profile, as well as bone profile and serum vitamin D were taken. This study cohort will be followed up again when participants turn 15, 17 and lastly, after a period of ten years (around the age of 27).

**Results:** Nine percent of the adolescents from this study were obese. More male participants smoked compared to female participants (15.4% vs. 4.7%). Adolescent males had higher fasting blood glucose but the female participants had lower high density lipoprotein (HDL-cholesterol) and higher low density lipoprotein (LDL-cholesterol). In addition, adolescents from the rural area had higher fasting blood glucose, diastolic blood pressure, total cholesterol and LDL-cholesterol.

**Discussion:** Our results demonstrated that adolescents from the rural area are at higher risk of NCDs compared to their urban counterpart. Tailor made public health interventions are highly recommended for adolescents as this may minimise the dreadful NCD burden in adulthood and health disparity between the rural and urban in the near future.

\* Correspondence: [hazreen.abdulmajid@gmail.com](mailto:hazreen.abdulmajid@gmail.com)

<sup>1</sup>Centre for Population Health (CePH) and Department of Social & Preventive Medicine, Faculty of Medicine, University Malaya, 50603 Kuala Lumpur, Malaysia

Full list of author information is available at the end of the article

## Background

Data from the World Health Organization (WHO) shows that non-communicable diseases (NCDs) caused approximately 63% of all deaths worldwide in 2008 [1] and almost 80% of deaths in 2008 from NCDs occurred in the low- and middle-income countries. Driven by the population growth and population ageing, deaths from the NCDs are projected to increase by 15% globally between 2010 and 2020, and will account for approximately 70% of global deaths by 2030 [1-3]. It is estimated that NCDs account for 67% of all deaths in Malaysia and there has been an increasing trend in recent decades [1,2]. Non-communicable diseases are largely attributed to modifiable and non-modifiable risk factors. The Malaysian National Health and Morbidity Survey (NHMS) 2011, demonstrated that the prevalence of obesity in less than 18 years old was 6.1% (CI: 5.6-6.8), with the highest prevalence among the Malay and Indian ethnic groups. A cross sectional study has identified unhealthy dietary intake and lack of physical activity level associated with higher body mass index among the Malaysian adolescents [4]. Behavioural risk factors such as unhealthy diet, insufficient physical activity, tobacco use, and excessive alcohol consumption, contribute to the development of various metabolic diseases such as hypertension, diabetes, hypercholesterolaemia, overweight and obesity. Alarmingly, these risk factors are also becoming rampant in adolescents and consequently, contribute to a higher cost to manage and treat NCDs in the future [3,5].

Despite various campaigns and programs undertaken to reduce the prevalence of risk factors of NCDs, these risk factors continue to be a major issue in both developed and developing countries in Asia [1]. The adolescent period encompasses several transitions whereby the family, environment and societal influences are strongly associated

with their health outcomes. In an attempt to address setbacks such as lack of data and poor understanding of NCDs and its risk factors in early life among the unique, multi-ethnic Malaysian population; the MyHeART study was developed as a cohort study targeting the rural and urban adolescent communities in Malaysia. The research goals include (a) identifying the prevalence and trends, of non-communicable diseases risk factors among adolescents in Peninsular Malaysia and (b) to evaluate how lifestyle factors (e.g. dietary intake and pattern, physical activities, smoking and alcohol consumption) of early adolescents influence the development of chronic NCD in their early adulthood. To the best of our knowledge, this is the first Malaysian adolescent cohort study with a representative sample size, comparable to adolescent cohort in high-income countries [7,8].

The objective of this study is to enable early detection and possible prevention of diseases by identifying predictors of NCDs. The outcome from this study will assist in the development of future pragmatic public health interventions to prevent NCDs in settings where resources are limited.

## Methods

### Study area and population

This prospective cohort study was designed to recruit 1500 secondary school students from the three states in the central and northern region of Peninsular Malaysia, namely Selangor, Federal Territory of Kuala Lumpur and Perak (Figure 1). Notably, Selangor is one of the most developed and populous states in Malaysia followed by Perak. The Federal Territory of Kuala Lumpur (KL), directly governed by the federal government of Malaysia comes in third rank in regards to population although its capital city is located within this territory.

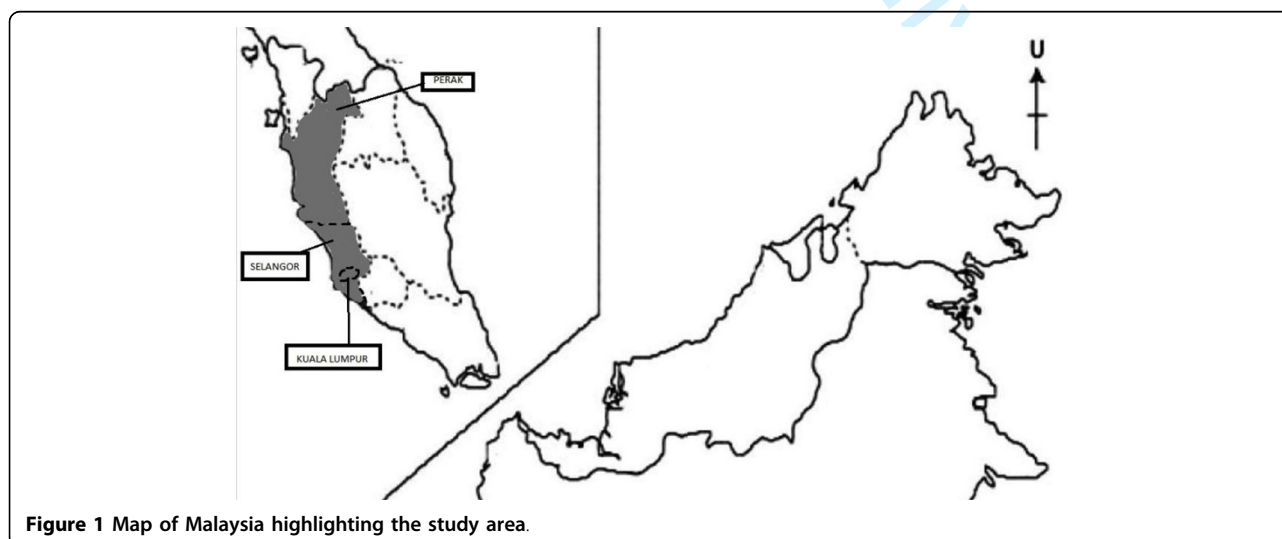

**Figure 1** Map of Malaysia highlighting the study area.

Interestingly, the Federal Territory of KL is a complete urban area, whereby the central zone is largely urban with several rural areas within the northern region.

The study population were 13 years old school children from public schools, i.e. in their first year (Form 1) of secondary school. Participants were required to be able to read Malay, the national language of Malaysia. Boarding, religious and vernacular schools were excluded, as majority of its students may encompass a single ethnic group.

### Sampling

The study followed a stratified sampling design. First, a complete list of the public secondary schools, located in the selected regions were obtained from the Ministry of Education Malaysia and used as the sampling frame. The schools were stratified into urban and rural based on the criteria provided by the Department of Statistics Malaysia. A number of schools from the urban and rural locations were randomly selected using computer-generated random number lists. All form one students (13 years old) who were able to speak and write in the national language were invited to participate in this study. Next, the participants and their parents/guardians received detailed written information about the study and consent forms. Finally, participants and their parents/guardians were required to submit completed consent forms to indicate their willingness to participate.

### Sample size calculation

The study used the stratified sampling where the following formula was applied for sample size calculation;  $n =$

$(z^2 \times p \times q / r \times e^2) \times \text{design effect}$  ( $z =$  the standard normal deviate set at 1.96 at 5% level for two-tailed test,  $p =$  estimated prevalence,  $q = 1 - p$ ,  $r =$  response rate and  $e =$  precision level). The sample size was calculated using the estimated prevalence of adolescent students aged 13-15 who smoked in school; 33% [7]. The total sample estimated was about 1500 participants.

### Data collection

#### Student and parental questionnaires

Two self-administered questionnaires were used (Table 1), a Parental Questionnaire and a Student Questionnaire. These questionnaires were adapted from the Young Hearts study, an adolescent cohort study conducted in Northern Ireland [9]. The parental questionnaire gathered information on the student's birth, health and lifestyle as a child, the parents' socioeconomic status and lifestyle, as well as personal and family history of NCDs. The student questionnaire on the other hand, collected information on demographics, lifestyle, pubertal staging, sleeping practices, satisfaction with life and behavioural factors. Detailed information was collected on smoking, alcohol consumption, online and electronic usage, as well as basic information on drug intakes and gambling. Health related information including breathing/airway and skin problems was also gathered. The Tanner Staging was referred in regards to the compilation of information on pubertal development [10]. Knowledge and awareness of sexual and reproductive health issues were also assessed.

**Table 1 Information gathered in the MyHEART study questionnaires.**

| Parental questionnaire                    | Data                                                                                                                                                                                                                                                                                                                                                                                                                                |
|-------------------------------------------|-------------------------------------------------------------------------------------------------------------------------------------------------------------------------------------------------------------------------------------------------------------------------------------------------------------------------------------------------------------------------------------------------------------------------------------|
| Questions relating to the child's mother  | Age, height, weight, current job, highest education, health problems during pregnancy/delivery, mode of delivery, age when delivered participant, number of children, smoking history including during pregnancy, consumption of alcoholic drinks, illnesses (obesity, high blood pressure, cholesterol, angina, heart attack, stroke, diabetes, asthma, bronchitis, osteoporosis, cancer), illness of close family members, income |
| Questions relating to the child's father  | Age, height, weight, current job, highest education, smoking history, consumption of alcoholic drinks, illnesses (obesity, high blood pressure, cholesterol, angina, heart attack, stroke, diabetes, asthma, bronchitis, osteoporosis, cancer), illness of close family members, income                                                                                                                                             |
| Questions relating to the child           | Birth weight, gestational age, infant feeding history, history of abnormal large appetite, excess weight gain, medical conditions or disabilities (congenital defects, cardiovascular problems, diabetes, asthma, allergies, mental health etc.), medication and supplement use                                                                                                                                                     |
| Student Questionnaire                     |                                                                                                                                                                                                                                                                                                                                                                                                                                     |
| Demographic and student's characteristics | Name, identification card number, home address, district, postcode, state, home telephone, mobile number, email, date of birth, ethnicity, religion, gender, nationality                                                                                                                                                                                                                                                            |
| Lifestyle                                 | Physical activity questionnaire (PAQ-c)[15], sleep duration and quality, satisfaction with life                                                                                                                                                                                                                                                                                                                                     |
| Health background                         | Eating habits, purging, dieting, breathing problems (wheezing, asthma, treatments), usage of inhalers, nose problems unrelated to flu (eg: sneezing, blocked nose), skin problems (rash, eczema)                                                                                                                                                                                                                                    |
| High risk behaviour                       | Smoking habits, alcohol consumption, drugs intake, online and electronic usage, gambling habits                                                                                                                                                                                                                                                                                                                                     |
| Female sexual and reproductive health     | Tanner staging system, menstrual periods, knowledge on sex                                                                                                                                                                                                                                                                                                                                                                          |
| Male sexual and reproductive health       | Tanner staging system, knowledge on sex                                                                                                                                                                                                                                                                                                                                                                                             |

In addition, these questionnaires were translated into Bahasa Melayu (the national language). Face and content validity were also evaluated in 30 subjects prior to the commencement of study. Self-administered parental questionnaires were completed by parents at home and submitted. Some missing information in the parental questionnaire was obtained with active follow-up, conducted via telephone interview, when required. The adolescents on the other hand completed their questionnaires at school (on the study day) under the supervision of the research team who ensured no required particulars were missing.

#### **Dietary assessment**

Generally, habitual dietary intake can be assessed using several methods such as diet histories (24-hour dietary recall or seven-days), food frequency, three days dietary records and duplicate food weighing to evaluate energy intake. However, the seven-days diet history was chosen for this study as this method has produced more valid estimates of energy intake in children and adolescents compared to other methods [11,12]. The tool was pre-tested on 40 participants from two different schools (one school each from urban and rural area respectively). For the actual study, seven qualified and trained dietitians used open-ended interviews with the students to collect information on the food and drinks that they consumed for breakfast, mid-morning snacks, lunch, afternoon tea, dinner and supper over the previous seven day period. Illustrated flip charts containing local food were used as supplementary tools to assist the study participants during the dietary evaluation and to help estimate the portion size of the foods that they consumed [13]. Nutrient intake was calculated using the Nutritionist Pro™ Diet Analysis (Axxya Systems, US) software.

#### **Physical activity**

Self-reported physical activity was assessed using validated physical activity questionnaire for older children (PAQ-C) based on a Malay version, which has good internal consistency and acceptable validity [14,15]. Ten items were assessed in PAQ-C to obtain physical activity level of the adolescents in the past seven days. The first item included the type and frequency of sports or/and dance the adolescents performed during the past seven days. The second to eighth items of the questionnaire assessed the activity of the adolescents during physical education (PE) classes, recess, lunch time, right after school, evenings, weekend and leisure periods. Five point Likert scale was used to answer items two to four. Item nine included the previous week physical activity frequency and item ten to report any unusual activities during the previous week. The categorisation of PAQ-C was based on a study by Crocker *et al.* [16].

#### **Physical evaluation**

Height was measured without socks and shoes using a calibrated vertical stadiometer (Seca Portable 217, Seca, UK), and was recorded to the nearest 0.1 cm. Weight was measured with light clothing, using a digital electronic weighing scale (Seca 813, Seca, UK) and was recorded to the nearest decimal fraction of kilogram (0.1 kg). Body mass index (BMI) was calculated as weight in kilograms divided by the square of height in meters. Body mass index z-score for age and gender was calculated using the World Health Organization (WHO) Anthro Software version 3.2.2 for the Statistical Package for the Social Sciences (SPSS) macro, based on WHO reference 2007 (WHO, Geneva, Switzerland). Body fat composition was measured using a portable body composition analyser (Tanita SC-240 MA, Body Composition Analyser, Tanita Europe B.V., The Netherlands). Both waist circumference (WC) and hip circumference (HC) were respectively measured with a non-elastic Seca measuring tape (Seca 201, Seca, UK), to the nearest millimetre.

A calibrated hand dynamometer (Jamar, Sammons Preston Rolyan, Illinois, US) was used to perform the hand grip strength test. Participants were asked to show their dominant hand. The first test was performed with dominant hand and next, with the non-dominant hand. Three sets of test were repeated alternately for both hands. The length of the hand span was also measured from the tip of the thumb to the tip of the small finger with the hand opened as wide as possible using a non-elastic Seca measuring tape (Seca 201, Seca, UK), to the nearest millimetre. Bone mineral density was measured using a portable broadband ultrasound bone densitometer (Hologic Sahara, Hologic Inc., USA).

Medically trained personnel, paediatricians, medical officers or staff nurses, measured the blood pressure and pulse rate of the participants after an interval of five minutes between each reading. The participants sat upright with his or her right upper arm positioned at the level of the heart with both feet flat on the floor. Systolic and diastolic arterial blood pressure were obtained using a stethoscope and a mercury sphygmomanometer (CK-101C, Spirit Medical Co., Taiwan). Three readings of blood pressure were taken with two minutes interval between each reading and the mean of the three readings were obtained.

#### **Exercise test**

An exercise test was performed under the close supervision of a sports physician. Participants with known medical conditions, musculoskeletal injuries, or who were acutely ill were excluded. The modified Harvard Step Test protocol (30 cm step) was used as it objectively categorises the performance level of children [17]. The participants get onto and off the step box at a pace of 30 cycles per



minute with a metronome set at 120 beat per minute (bpm), for a total of five minutes. A finger pulse oximeter (Baseline 12-1926 Fingertip Pulse Oximeter, Fabrication Enterprises Inc., USA) was attached to one of the student's fingers, and the pulse rate was then continuously monitored. The peak pulse rate of each student during each minute of the step box exercise was recorded. Those with a pulse rate of 200 bpm, and those who had difficulty in breathing, or were unable to finish, were directed to stop immediately.

#### **Blood profile**

Participants were asked to fast for at least ten hours before the study. A total of 15 ml of fasting blood was withdrawn from each participant at baseline and subsequently collected during the follow up cohort. Blood were sent to the certified International Organization for Standardization (ISO) hospital pathology lab for analysis. The samples were temporarily stored at four degrees Celsius in a cool box immediately after the blood had been withdrawn to preserve levels of markers that are sensitive to degradation due to increase in temperatures. All samples were processed in the field laboratories in the states. Samples were spun and stored as serum and divided into several aliquots of 0.5 ml of serum. The following tests were performed at the field laboratories: full blood count (Advia 2120 flow cytometry, Siemens, Germany), fasting blood glucose (Advia Chemistry, Siemens, Germany), renal, lipid and bone profiles (Advia Chemistry, Siemens, Germany), vitamin D and parathyroid hormone (Advia Centaur XP immunoassay, Siemens, Germany). All the aliquots for future lab analysis were stored at a temperature of 80 degree Celsius freezers at the field laboratories until they were ready to be transported back to the University of Malaya (UM) bio bank.

Additional blood sampling (three ml bloods for serum and preparation of buffy coats) will be collected in future cohorts to control errors that may arise from single sampling. All other blood measurements in this cohort will be repeated in the future cohorts.

#### **Proposed follow-up and outcome measurement**

The cohort will be followed up at two, four and 14 years post baseline data collection. Similar assessments will be performed including the questionnaires, seven-days diet recall, anthropometric measurement, blood pressure measurement, exercise test and blood sampling. In Malaysia, each citizen is provided with a national identification (ID) card that has a unique number sequence. This identification number will be used during follow-up to ensure correct matching of longitudinal data of each individual.

#### **Dissemination of results to the participants**

Results on full blood counts, renal profile, fasting blood glucose and lipid profile were verified by a paediatrician

and disseminated to the participants' parents. The participants were informed to have a clinic follow-up at the nearest government clinics or at our institution for further management or treatment if the results were beyond the clinical reference ranges and if they require urgent medical attention.

#### **Data management and data access**

Data entry of questionnaires and blood results were entered manually. The principal researchers had prepared the template for data entry. However, to minimise errors from manual data entry, two trained researchers cross-checked data entered by each other. Regular checking and data cleaning were implemented. Any discrepancies were notified to the data manager.

To ensure standardised data management, training was provided to field researchers who are involved in the data collection. Next, all questionnaires were checked by the field researchers for its completeness. Data are treated confidentially by removing any identification (names, addresses and national identification number) and specific ID was provided for data analysis. These confidential data are only accessible to the authorised research members. All the data are stored on the University of Malaya server. Requests for any data or information for the purpose of writing a manuscript can be made to the authorised research staff via email.

#### **Definitions**

Overweight and obesity was defined using the International Obesity Task Force criteria with extrapolation to adult BMI cut-offs of 25 kg/m<sup>2</sup> for overweight (21.91 kg/m<sup>2</sup> for males and 22.58 kg/m<sup>2</sup> for female) and 30 kg/m<sup>2</sup> for obesity (26.84 kg/m<sup>2</sup> for male and 27.76 kg/m<sup>2</sup> for female) [18]. The cut-off value used for waist circumference at 90<sup>th</sup> percentile was 83.8 cm for male and 78.8 cm for female [19]. The cut-off points for at risk of metabolic syndrome includes high density lipoprotein (HDL)-cholesterol <1.03 mmol/l, triglycerides ≥1.7 mmol/l and fasting plasma glucose ≥5.6 mmol/l or known type 2 diabetes mellitus [20]. Blood pressure is considered high if the systolic blood pressure ≥130 mmHg or diastolic blood pressure ≥85 mmHg [20].

#### **Data analysis and statistical methods**

For data analysis, the SPSS software for Windows (Version 20.0, Chicago, IL, US) was used. Qualitative variables were described as frequencies and percentages.

For baseline comparison, the chi-square tests were used to compare groups. To compare two groups for quantitative variable, the *t*-test was used if variances are equal and non-parametric Mann-Whitney-U test were used, otherwise.

For comparing more than two groups, the ANOVA procedure was used, and where necessary, the non-

parametric Kruskal-Wallis test was used. Multiple linear regressions were performed separately by gender to determine the relationship between body composition measurements and selected variables.

In analysing longitudinal data, repeated measures and generalised estimation procedures in SPSS will be used. Attempt will be made to analyse the data using latent growth models in the AMOS software.

### Ethical considerations

Ethical approval was obtained from the Medical Ethics Committee, University Malaya Medical Centre (MEC Ref. No: 896.34). The National Medical Research Register number is 14-376-20486. Participation in the study was voluntary and written informed consent and ascent for participation in the study was obtained from the parents or guardian as well as the participants.

### Results

In total, at the time of sampling, there were 238 secondary schools in the northern zone, 261 in the central zone and 96 in KL. Based on a feasibility study performed in 2011, and an estimate of recruitment of approximately 80-120 students per school, 15 schools were randomly selected for the study, five in Selangor, seven in Perak and three in KL; eight were urban schools and seven rural. There were 2694 eligible participants within the schools and 1361 voluntarily participated between March and May 2012, giving an overall response rate of 51%. Urban schools response rate ranges from 22%-53% whilst rural schools response rates range from 40%-84%.

The distribution of the participants in terms of gender, ethnicity and location (urban and rural) and key risk factors for chronic non-communicable diseases including hypertension, fasting blood glucose, hypercholesterolaemia, overweight/obesity and smoking are shown in Table 2.

Table 2 shows the breakdown of the participants in terms of age, sex, ethnicity, location (urban or rural) and the prevalence of cardiovascular risk factors. There were more female participants than male participants and higher number of participant were from the urban schools compared to rural. There were more Malay compared to the other two ethnic groups as Malay is the major ethnic group in Malaysia. The overall prevalence of reported smoking was 8.8%, out of which 15.4% represented male participants and 4.7% represented females participants. The overall overweight/obese prevalence among the adolescents in this study was 23.9%, with 8.5% of them obese and 15.4% overweight.

### Discussion

The baseline data collected in the MyHeART study showed the prevalence of overweight in Malaysian adolescents was around 15% for both males and females with the

prevalence of obesity in males recorded higher percentage than the females (10.7% vs. 7.2%). Furthermore, our studies have shown an increasing trend of overweight children aged 1-12 years from 20.7% in 2002 to 26.5% in 2008 within the Peninsular Malaysia (National Strategic Plan 2010) and a higher prevalence of 34.2% was reported for the prevalence of overweight and obese children in metropolitan Kuala Lumpur [21]. The prevalence of overweight and obese Malaysian adolescents is also higher than other South East Asian countries such as the Philippines' (4.8%) [22] and Thailand (16.6%) [23]. Hence, this is certainly alarming as the trend of overweight and obesity for developing country like Malaysia is mirroring countries like England i.e., following an increasing trend where 11% of male and 12% of female aged 2 until 15 years were obese [24]. In addition, the prevalence of overweight or obese adolescents in the United States for those aged 12 to 19 years was also high, 35% compared to 4.6 % in 1963 [25].

Evidences of childhood obesity leading to complications related to obesity in adulthood [25,26] remain consistent and urbanisation may contribute to the rise of overweight and obese population in Malaysia. Although the worldwide study (n = 19244) revealed that adult obesity in developed countries have slowed down, the prevalence of obesity among adults in developing countries is still disturbing, exceeding 50% [27]. The influence of urbanisation as a result of high economic growth has undoubtedly contributed to the prevalence of overweight and obese adolescents in China [28], India [29], Argentina [30] and Poland [31]. Similarly, the rapid economic growth and urbanisation may have played a crucial role in the increased prevalence of overweight and obesity in Malaysia.

The prevalence of cardiovascular risk factors (high fasting blood glucose and smoking) was found to be higher in male participants compared to female participants. However, female participants were noted to have lower HDL-cholesterol (a protective cardiovascular risk factor). Adolescents from the rural areas were found to have higher fasting blood glucose, diastolic blood pressure, total cholesterol and low-density lipoprotein (LDL)-cholesterol levels compared to their urban counterpart. Hence, it is vital to monitor and screen these adolescents especially those in rural areas since these markers of metabolic syndrome are strongly associated with early cardiac disease and type-2 diabetes mellitus [32-34].

On a positive note, there are several strengths that can be highlighted from this study. To our knowledge, this is the first adolescent cohort study to be conducted in Malaysia that has a comprehensive anthropometric assessment, complete fasting blood profile and dietary assessment. At present, there is one large adult cohort similar to this study that was conducted in Malaysia i.e. The Malaysian Cohort [35]. As such, our study may

**Table 2 Demographic Characteristics and prevalence of parameters for adolescent aged 13 years old by gender and Place of Residences**

| Baseline characteristic<br>(N = 1361)                                | Male<br>N = 525<br>No (%) | Female<br>N = 836<br>No (%) | Total (%)        | Chi square           |                |
|----------------------------------------------------------------------|---------------------------|-----------------------------|------------------|----------------------|----------------|
|                                                                      |                           |                             |                  | x <sup>2</sup>       | p-value        |
| <b>Place of residence</b>                                            |                           |                             |                  |                      |                |
| Urban                                                                | 240 (45.7)                | 483 (57.8)                  | 723 (53.1)       | 18.8                 | <0.001         |
| Rural                                                                | 285 (54.3)                | 353 (42.2)                  | 638 (46.9)       |                      |                |
| <b>Systolic Blood Pressure (mmHg)</b>                                |                           |                             |                  |                      |                |
| Normal (<130)                                                        | 497 (95.2)                | 795 (95.1)                  | 1292 (94.9)      | 0.5                  | 0.478          |
| Hypertensive (≥130)                                                  | 25 (4.8)                  | 33 (3.9)                    | 58 (4.3)         |                      |                |
| <b>Diastolic Blood Pressure (mmHg)</b>                               |                           |                             |                  |                      |                |
| Normal (<85)                                                         | 496(94.5)                 | 788 (94.3)                  | 1284 (94.3)      | 0.02                 | 0.901          |
| Hypertensive (≥85)                                                   | 26 (5.0)                  | 40 (4.8)                    | 66 (4.8)         |                      |                |
| <b>Fasting Blood Glucose (mmol/L)</b>                                |                           |                             |                  |                      |                |
| Normal (3.9-5.5)                                                     | 496 (94.5)                | 788 (94.3)                  | 1284 (94.1)      | 9.3                  | <0.05          |
| High (≥5.6)                                                          | 26 (5.0)                  | 27 (3.2)                    | 53 (3.9)         |                      |                |
| Low (<3.9)                                                           | 3 (0.6)                   | 21 (2.5)                    | 24 (1.8)         |                      |                |
| <b>Total Cholesterol (mmol/L)</b>                                    |                           |                             |                  |                      |                |
| Desirable (<5.2)                                                     | 415 (79.0)                | 624 (74.6)                  | 1039 (76.3)      | 3.5                  | 0.176          |
| Borderline (5.2-6.2)                                                 | 92 (17.5)                 | 178 (21.3)                  | 270 (19.8)       |                      |                |
| High Risk (>6.2)                                                     | 18 (3.4)                  | 34 (4.1)                    | 52 (3.8)         |                      |                |
| <b>HDL Cholesterol (mmol/L)</b>                                      |                           |                             |                  |                      |                |
| At risk (≤1.03)                                                      | 478 (91.0)                | 795 (95.1)                  | 1273 (93.5)      | 8.74                 | <0.05          |
| Normal (>1.03)                                                       | 47 (9.0)                  | 41 (4.9)                    | 88 (6.5)         |                      |                |
| <b>LDL Cholesterol (mmol/L)</b>                                      |                           |                             |                  |                      |                |
| Optimal (<2.58)                                                      | 252 (48.0)                | 334 (40.0)                  | 586 (43.1)       | 9.74                 | <0.05          |
| Near Optimal (2.58-3.34)                                             | 179 (34.1)                | 343 (41.0)                  | 522 (38.4)       |                      |                |
| Borderline (3.35-4.11)                                               | 73 (13.9)                 | 120 (14.4)                  | 193 (14.2)       |                      |                |
| High (4.12-4.89)                                                     | 15 (2.9)                  | 31 (3.7)                    | 46 (3.4)         |                      |                |
| Very high (>4.9)                                                     | 6 (1.1)                   | 8 (1.0)                     | 14 (1.0)         |                      |                |
| <b>Triglycerides (mmol/L)</b>                                        |                           |                             |                  |                      |                |
| Normal (<1.7)                                                        | 491 (93.5)                | 784 (93.8)                  | 1275 (93.7)      | 0.04                 | 0.850          |
| High (≥ 1.7)                                                         | 34 (6.5)                  | 52 (6.2)                    | 86 (6.3)         |                      |                |
| <b>BMI (IOTF standards kgm<sup>-2</sup>)</b>                         |                           |                             |                  |                      |                |
| Underweight (<15.8 <sup>m</sup> ; <16.3 <sup>f</sup> )               | 103 (20.0)                | 183 (23.0)                  | 286 (21.9)       | 5.8                  | 0.329          |
| Normal (15.8 - <21.9 <sup>m</sup> ; 16.3 - <22.6 <sup>f</sup> )      | 282 (53.7)                | 456 (54.5)                  | 738 (54.2)       |                      |                |
| Overweight (<21.9 - <26.8 <sup>m</sup> ; 22.6 - <27.8 <sup>f</sup> ) | 82 (15.6)                 | 128 (15.3)                  | 210 (15.4)       |                      |                |
| Obese (≥26.8 <sup>m</sup> ; ≥27.8 <sup>f</sup> )                     | 56(10.7)                  | 60 (7.2)                    | 116 (8.5)        |                      |                |
| <b>Smoking</b>                                                       |                           |                             |                  |                      |                |
| No                                                                   | 432 (82.3)                | 790 (94.5)                  | 1222 (89.8)      | 47.8                 | <0.001         |
| Yes                                                                  | 81 (15.4)                 | 39 (4.7)                    | 120 (8.8)        |                      |                |
|                                                                      | <b>Urban<br/>No (%)</b>   | <b>Rural<br/>No (%)</b>     | <b>Total (%)</b> | <b>Chi square</b>    |                |
|                                                                      |                           |                             |                  | <b>x<sup>2</sup></b> | <b>p-value</b> |
| <b>Ethnicity</b>                                                     |                           |                             |                  |                      |                |
| Malay                                                                | 521 (72.1)                | 570 (89.3)                  | 1091 (80.2)      | 118.5                | <0.001         |
| Chinese                                                              | 98 (13.6)                 | 7 (1.1)                     | 105 (7.7)        |                      |                |
| Indian                                                               | 83 (11.5)                 | 22 (3.4)                    | 105 (7.7)        |                      |                |
| Others                                                               | 12 (1.7)                  | 29 (4.5)                    | 41 (3.0)         |                      |                |
| <b>Systolic Blood Pressure (mmHg)</b>                                |                           |                             |                  |                      |                |
| Normal (<130)                                                        | 680 (94.1)                | 612 (95.9)                  | 1292 (94.9)      | 0.14                 | 0.705          |
| Hypertensive (≥130)                                                  | 32 (4.4)                  | 26 (4.1)                    | 58 (4.3)         |                      |                |

**Table 2 Demographic Characteristics and prevalence of parameters for adolescent aged 13 years old by gender and Place of Residences (Continued)**

|                                        |            |            |             |      |        |
|----------------------------------------|------------|------------|-------------|------|--------|
| <b>Diastolic Blood Pressure (mmHg)</b> |            |            |             |      |        |
| Normal (<85)                           | 687 (95.0) | 597 (93.6) | 1284 (94.3) |      |        |
| Hypertensive ( $\geq 85$ )             | 25 (3.5)   | 41 (6.4)   | 66 (4.8)    | 6.1  | <0.05  |
| <b>Fasting Blood Glucose (mmol/L)</b>  |            |            |             |      |        |
| Normal (3.9-5.5)                       | 692 (95.7) | 592 (92.8) | 1284 (94.1) | 10.7 | <0.05  |
| High ( $\geq 5.6$ )                    | 26 (3.6)   | 27 (4.2)   | 53 (3.9)    |      |        |
| Low (<3.9)                             | 5 (0.7)    | 19 (3.0)   | 24 (1.8)    |      |        |
| <b>Total Cholesterol (mmol/L)</b>      |            |            |             |      |        |
| Desirable (<5.2)                       | 579 (80.1) | 460 (72.1) | 1039 (76.3) |      |        |
| Borderline (5.2-6.2)                   | 127 (17.6) | 143 (22.4) | 270 (19.8)  | 15.6 | <0.001 |
| High Risk (>6.2)                       | 17 (2.4)   | 35 (5.5)   | 52 (3.8)    |      |        |
| <b>HDL Cholesterol (mmol/L)</b>        |            |            |             |      |        |
| At risk ( $\leq 1.03$ )                | 681 (94.2) | 592 (92.8) | 1273 (93.5) | 1.1  | 0.294  |
| Normal (>1.03)                         | 42 (5.8)   | 46 (7.2)   | 88 (6.5)    |      |        |
| <b>LDL Cholesterol (mmol/L)</b>        |            |            |             |      |        |
| Optimal (<2.58)                        | 343 (47.4) | 243 (38.1) | 586 (43.1)  |      |        |
| Near Optimal (2.58-3.34)               | 271 (37.5) | 251 (39.3) | 522 (38.4)  | 27.9 | <0.001 |
| Borderline (3.35-4.11)                 | 93 (12.9)  | 100 (15.7) | 193 (14.2)  |      |        |
| High (4.12-4.89)                       | 10 (1.4)   | 36 (5.6)   | 46 (3.4)    |      |        |
| Very high (>4.9)                       | 6 (0.8)    | 8 (1.3)    | 14 (1.0)    |      |        |
| <b>Triglycerides (mmol/l)</b>          |            |            |             |      |        |
| Normal (<1.7)                          | 670 (92.7) | 605 (94.8) | 1275 (93.7) | 2.67 | 0.102  |
| High ( $\geq 1.7$ )                    | 53 (7.3)   | 33 (5.2)   | 86 (6.3)    |      |        |
| <b>Smoking</b>                         |            |            |             |      |        |
| No                                     | 656 (90.7) | 566 (88.7) | 1222 (89.8) | 1.26 | 0.262  |
| Yes                                    | 58 (8.0)   | 62 (9.7)   | 120 (8.8)   |      |        |

m=male, f=female

contribute to the lack of knowledge in regards to the health status among the younger generation of Malaysians. Moreover, most studies conducted on school children in Malaysia were cross-sectional studies, as such previous analyses may not be able to capture the progression and variation of biomarkers, anthropometric measurements, nutritional status and diet among the adolescent cohort. Next, this study used stratified sampling to ensure adequate recruitment of participants from both urban and rural. As such, our study enabled us to investigate health disparity between rural and urban adolescents. Although seven-days diet history is the most reliable tool to assess energy intake for this group, its implementation requires a lot of resources and it is costly. By having a validated food frequency questionnaire (FFQ), resources can be minimised and simultaneously enable the dietary intake to be reported by the respondents independently. To date, there is only one validated FFQ for adolescents in Malaysia with subjects recruited exclusively from one state and were predominantly Malays [36]. The data that we gathered from this study using the seven-days diet history on the other hand will assist us in the development of a more robust FFQ

for adolescents. This new FFQ will be validated against the biomarkers.

On the contrary, despite all the advantages mentioned above, the first cohort has several limitations such as low representative of the Chinese and Indian ethnic groups. Thus for the next cohort, it is necessary to oversample the Chinese and Indian ethnic groups for further recruitment. Next, questionnaires were entered manually and therefore, for future cohorts, it would be beneficial to use software [37] that can classify paper forms and convert the required data into usable digital information, enabling researchers to extract information easily.

Results from this cohort may potentially help the stakeholders and researchers to conduct and evaluate appropriate intervention that may give an impact towards the improvement of adolescents' health status and consequently for their adulthood. This will also lead to the development of health policies that will influence the national strategic plan for better health outcome thus minimising the treatment cost of the chronic NCDs. To ensure this cohort study is a successful venture, careful considerations and appropriate strategies should be implemented. Few important considerations



to minimise the time that may affect participants study time were by conducting the recruitment systematically during physical education day and recruiting participants between February and June to ensure the recruitment period is far from the examination months. The school team involvement in planning and implementing future cohorts is important, and this is constantly being built up by building good rapport between researchers and the school team.

In conclusion, it appears that adolescents' male participants in this cohort have higher fasting blood glucose and reported smoking compared to female participants at a young age of 13 years old, with the females having lower HDL-cholesterol. This study also revealed that the adolescents from the rural area had more non-communicable diseases risk factors. The result of this study is hoped to gain the attention of the public health sector to develop more effective measures in schools to minimise this present health gap.

#### Competing interests

The authors declare that they have no competing interests.

#### Authors' contributions

All authors contribute to the study design; MAH, MYJ, NAS and TTS were involved in the field work and data collection. MAH was responsible for the drafting of this manuscript and all authors approved the final manuscript.

#### Acknowledgements

This study was supported by grants from University of Malaya Research Programme (RP022A-14HTM) and Vice Chancellor Research Grant (UMQUB3D-2011). The post-doctoral research fellow position for this project was jointly funded by University of Malaya and Queen's University of Belfast. The funders had no role in study design, collection, analysis and interpretation of data, writing of manuscript, or decision to submit for publication. We would like to thank all the enumerators who helped us throughout data collection. We are also grateful for the support and guidance provided by MyHeART study group members (Dr Nik Rubiah Nik Abdul Rashid and Dr Zariah Mohd Zain (Ministry of Health, Malaysia), Dr Maizurah Omar (USM), Dr Mohamad Haniki Nik Mohamed (UIA), Dr Khadijah Shamsuddin (UKM), Dr Rosnah Sutan (UKM), Dr Sim Pei Ying (University of Malaya) and Dr Nahar Mohd Azmi (University of Malaya).

This article has been published as part of *BMC Public Health* Volume 14 Supplement 3, 2014: Proceedings of the International Research Symposium on Population Health 2013. The full contents of the supplement are available online at <http://www.biomedcentral.com/bmcpublichealth/supplements/14/S3>. Publication charges for this supplement were funded by the University of Malaya.

#### Authors' details

<sup>1</sup>Centre for Population Health (CePH) and Department of Social & Preventive Medicine, Faculty of Medicine, University Malaya, 50603 Kuala Lumpur, Malaysia. <sup>2</sup>Department of Paediatrics, Faculty of Medicine, University Malaya, 50603 Kuala Lumpur, Malaysia. <sup>3</sup>Julius Centre University of Malaya (JCUM), Department of Social and Preventive Medicine Faculty of Medicine, University Malaya, 50603 Kuala Lumpur, Malaysia. <sup>4</sup>Centre of Public Health, Queen's University Belfast, Belfast, UK.

Published: 24 November 2014

#### References

1. Beaglehole R, Ebrahim S, Reddy S, Voûte J, on behalf of the Chronic Disease Action Group: **Prevention of Chronic Diseases: A Call to Action.** *The Lancet* 2007, **370**(9605):2152-2157.

2. World Health Organization: *Global status report on non-communicable diseases* Geneva: World Health Organization; 2011.
3. Mathers C, Loncar D: **Projections of Global Mortality and Burden of Disease from 2002 to 2030.** *PLoS Med* 2006, **3**(11):e442.
4. Zailiah MS, Khor GL, Minalini K, Norimah AK, Ang M: **Dietary intake, physical activity and energy expenditure of Malaysian adolescents.** *Singapore Med J* 2006, **47**(6):491-498.
5. Institute of Public Health (2011) the National Health and Morbidity Survey 2011 (NHMS 2011): Kuala Lumpur, Malaysia: Institute for Public Health, National Institutes of Health, Ministry of Health Malaysia; 188p.
6. Wijnstok NJ, Twisk JW, Young IS, Woodside JV, McFarlane C, McEneny J, Hoekstra T, Murray L, Boreham CA: **Inflammation markers are associated with cardiovascular diseases risk in adolescents: the Young Hearts project 2000.** *J Adolesc Health* 2010, **47**(4):346-351.
7. Newnham JP, Evans SF, Michael CA, et al: **Effects of frequent ultrasound during pregnancy: a randomised controlled trial.** *Lancet* 1993, **342**:887-891.
8. World Health Organization. Smoking report WPR. 2013 [<http://www.wpro.who.int/topics/tobacco/en>], Accessed February 12.
9. Watkins DC, Murray LJ, McCarron P, Boreham CA, Cran GW, Young IS, McGartland C, Robson PJ, Savage JM: **Ten-year trends for fatness in Northern Irish adolescents: the Young Hearts Projects—repeat cross-sectional study.** *Int J Obes* 2005, **29**(6):579-85.
10. Roloff L, Elfving M: **Evaluation of self-assessment of pubertal maturation in boys and girls using drawings and orchidometer.** *J Pediatr Endocrinol Metab* 2012, **25**(1):125-129.
11. Livingstone MB, Prentice AM, Coward WA, Strain JJ, Black AE, Davies PS, Stewart CM, McKenna PG, Whitehead R: **Validation of estimates of energy intake by weighed dietary record and diet history in children and adolescents.** *Am J Clin Nutr* 1992, **56**(1):29-35.
12. Livingstone MB, Robson PJ, Wallace JM: **Issues in dietary intake assessment of children and adolescents.** *Br J Nutr* 2004, **92**(Suppl 2): S213-222.
13. **Atlas of Food Exchanges and Portion Sizes.** MDC Publisher Sdn Bhd; 2009.
14. Kowalski KC, Crocker PRE, Faulkner RA: **Validation of the physical activity questionnaire for older children.** *Pediatric exercise science* 1997, **9**(2):174-186.
15. Dan SP, Mohd NM, Zailiah MS: **Determination of factors associated with physical activity levels among adolescents attending school in Kuantan, Malaysia.** *Malays J Nutr* 2011, **17**(2):175-817.
16. Crocker PR, Bailey DA, Faulkner RA, Kowalski KC, McGrath R: **Measuring general levels of physical activity: preliminary evidence for the Physical Activity Questionnaire for Older Children.** *Med Sci Sports Exerc* 1997, **29**(10):1344-1349.
17. Keen EN, Sloan AW: **Observations on the Harvard Step Test.** *J Appl Physiol* 1958, **13**(2):241-243.
18. Cole TJ, Bellizzi CMary, Flegal MKatherine, Dietz HWilliam: **Establishing a standard definition for child overweight and obesity worldwide: international survey.** *BMJ* 2000, **320**:1240-1243.
19. Poh BK, Jannah AN, Chong LK, Ruzita AT, Ismail MN, McCarthy D: **Waist circumference percentile curves for Malaysian children and adolescents aged 6.0-16.9 years.** *International Journal of Pediatric Obesity* 2011, **6**:229-235.
20. The IDF Consensus Definition of the Metabolic Syndrome In Children and Adolescents: International Diabetes Federation; 2007.
21. Ismail MN, Ruzita AN, Norimah AK, Poh BK, Nik Shanita S, Nik Mazlan M, Roslee R, Nurunnajihah N, Wong JE, Nur Zakiah MS, Raduan S: **Prevalence and trends of overweight and obesity in two cross-sectional studies of Malaysian children, 2002-2008. In MASO 2009 Scientific Conference on Obesity: obesity and our environment.** Kuala Lumpur; 2009.
22. Nutritional Status of Filipino Children and Selected Population groups: 2005 Update: **Philippine Nutrition Facts & Figures 2005.** Food and Nutrition Research Institute, Department of Science and Technology. 2008.
23. Jitnarin N, Kosulwat V, Rojroogwasingkul N, Boonpradern A, Haddock CK, Poston WS: **Prevalence of overweight and obesity in Thai population: results of the National Thai Food Consumption Survey.** *Eat Weight Disord* 2011, **16**(4):242-249.
24. Health and Social Care Information Centre (Lifestyles Statistics): *Statistics on obesity, Physical Activity and Diet: England* London (2013) The Health and Social Care Information Centre; 2014, (accessed 2nd August).

25. Ogden CL, Carroll MD, Kit BK, Flegal KM: **Prevalence of childhood and adult obesity in the United States, 2011-2012.** *JAMA* 2014, **311**(8):806-814.
26. Bluher S, Schwarz P: **Metabolically healthy obesity from childhood to adulthood - Does weight status alone matter?** *Metabolism* 2014, **63**(9):1084-1092, doi: 10.1016/j.metabol.2014.06.009.
27. Ng M, Fleming T, Robinson M, Thomson B, Graetz N, Margono C, et al: **Global, regional, and national prevalence of overweight and obesity in children and adults during 1980-2013: a systematic analysis for the Global Burden of Disease Study 2013.** *Lancet* 2014, doi:10.1016/S0140-6736(14)60460-8.
28. Zhang YX, Wang SR: **Prevalence and regional distribution of childhood overweight and obesity in Shandong Province, China.** *World J Pediatr* 2013, **9**(2):135-139.
29. Ebrahim S, Kinra S, Bowen L, Andersen E, Ben-Shlomo Y, Lyngdoh T, et al: **The effect of rural-to-urban migration on obesity and diabetes in India: a cross-sectional study.** *PLoS Med* 2010, **7**(4):e1000268.
30. Cesani MF, Garraza M, Bergel Sanchis ML, Luis MA, Torres MF, Quintero FA, et al: **A comparative study on nutritional status and body composition of urban and rural schoolchildren from Brandsen district (Argentina).** *PLoS One* 2013, **8**(1):e52792.
31. Machado-Rodrigues AM, Coelho-e-Silva MJ, Mota J, Padez C, Ronque E, Cumming SP, et al: **Cardiorespiratory fitness, weight status and objectively measured sedentary behaviour and physical activity in rural and urban Portuguese adolescents.** *J Child Health Care* 2012, **16**(2):166-77.
32. Ballantyne CM, Hoogeveen RC, McNeill AM, Heiss G, Schmidt ML, Duncan BB, Pankow JS: **Metabolic syndrome risk for cardiovascular disease and diabetes in the ARIC study.** *International Journal of Obesity* 2008, **32**(Suppl 2):21-24.
33. Mottillo S, Filion KB, Genest J, Joseph L, Pilote L, Poirier P, Rinfret S, Schiffrin EL, Eisenberg MJ: **The Metabolic Syndrome and Cardiovascular Risk: A Systematic Review and Meta-Analysis.** *Journal of the American College of Cardiology* 2010, **56**(14):1113-1132.
34. Wilson PW, D'Agostino RB, Parise H, Sullivan L, Meigs JB: **Metabolic Syndrome as a Precursor of Cardiovascular Disease and Type 2 Diabetes mellitus.** *Circulation* 2005, **112**:3066-3072.
35. Jamal R, Syed Zakaria SZ, Kamaruddin MA, Abd Jalal N, Ismail N, Mohd Kamil N, Abdullah N, Baharudin N, Hussin NH, Othman H, Mahadi NM: **The Malaysian Cohort Study Group: Cohort profile: The Malaysian Cohort (TMC) project: a prospective study of non-communicable diseases in a multi-ethnic population.** *Int J Epidemiol* 2014, Advance Access published April 11, 2014.
36. Nurul-Fadhilah A, Teo PS, Foo LH: **Validity and reproducibility of a food frequency questionnaire (FFQ) for dietary assessment in Malay adolescents in Malaysia.** *Asia Pac J Clin Nutr* 2012, **21**(1):97-103.
37. HP TeleForm. 2014 [<http://www.hpteleform.com>].

doi:10.1186/1471-2458-14-S3-S6

**Cite this article as:** Hazreen et al.: An exploratory study on risk factors for chronic non-communicable diseases among adolescents in Malaysia: overview of the Malaysian Health and Adolescents Longitudinal Research Team study (The MyHeART study). *BMC Public Health* 2014 **14**(Suppl 3):S6.

**Submit your next manuscript to BioMed Central  
and take full advantage of:**

- Convenient online submission
- Thorough peer review
- No space constraints or color figure charges
- Immediate publication on acceptance
- Inclusion in PubMed, CAS, Scopus and Google Scholar
- Research which is freely available for redistribution

Submit your manuscript at  
[www.biomedcentral.com/submit](http://www.biomedcentral.com/submit)

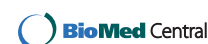

**STROBE 2007 (v4) checklist of items to be included in reports of observational studies in epidemiology\***  
**Checklist for cohort, case-control, and cross-sectional studies (combined)**

| Section/Topic             | Item # | Recommendation                                                                                                                                                                                                                                                                                                                                                                                                                                                         | Reported on page # |
|---------------------------|--------|------------------------------------------------------------------------------------------------------------------------------------------------------------------------------------------------------------------------------------------------------------------------------------------------------------------------------------------------------------------------------------------------------------------------------------------------------------------------|--------------------|
| Title and abstract        | 1      | (a) Indicate the study’s design with a commonly used term in the title or the abstract                                                                                                                                                                                                                                                                                                                                                                                 | 1                  |
|                           |        | (b) Provide in the abstract an informative and balanced summary of what was done and what was found                                                                                                                                                                                                                                                                                                                                                                    | 1                  |
| <b>Introduction</b>       |        |                                                                                                                                                                                                                                                                                                                                                                                                                                                                        |                    |
| Background/rationale      | 2      | Explain the scientific background and rationale for the investigation being reported                                                                                                                                                                                                                                                                                                                                                                                   | 3                  |
| Objectives                | 3      | State specific objectives, including any pre-specified hypotheses                                                                                                                                                                                                                                                                                                                                                                                                      | 3                  |
| <b>Methods</b>            |        |                                                                                                                                                                                                                                                                                                                                                                                                                                                                        |                    |
| Study design              | 4      | Present key elements of study design early in the paper                                                                                                                                                                                                                                                                                                                                                                                                                | 4                  |
| Setting                   | 5      | Describe the setting, locations, and relevant dates, including periods of recruitment, exposure, follow-up, and data collection                                                                                                                                                                                                                                                                                                                                        | 4                  |
| Participants              | 6      | (a) <i>Cohort study</i> —Give the eligibility criteria, and the sources and methods of selection of participants. Describe methods of follow-up<br><i>Case-control study</i> —Give the eligibility criteria, and the sources and methods of case ascertainment and control selection. Give the rationale for the choice of cases and controls<br><i>Cross-sectional study</i> —Give the eligibility criteria, and the sources and methods of selection of participants | 4                  |
|                           |        | (b) <i>Cohort study</i> —For matched studies, give matching criteria and number of exposed and unexposed<br><i>Case-control study</i> —For matched studies, give matching criteria and the number of controls per case                                                                                                                                                                                                                                                 | Not applicable     |
| Variables                 | 7      | Clearly define all outcomes, exposures, predictors, potential confounders, and effect modifiers. Give diagnostic criteria, if applicable                                                                                                                                                                                                                                                                                                                               | 4-5                |
| Data sources/ measurement | 8*     | For each variable of interest, give sources of data and details of methods of assessment (measurement). Describe comparability of assessment methods if there is more than one group                                                                                                                                                                                                                                                                                   | 4-5                |
| Bias                      | 9      | Describe any efforts to address potential sources of bias                                                                                                                                                                                                                                                                                                                                                                                                              | Not applicable     |
| Study size                | 10     | Explain how the study size was arrived at                                                                                                                                                                                                                                                                                                                                                                                                                              | 4                  |
| Quantitative variables    | 11     | Explain how quantitative variables were handled in the analyses. If applicable, describe which groupings were chosen and why                                                                                                                                                                                                                                                                                                                                           | 6                  |
| Statistical methods       | 12     | (a) Describe all statistical methods, including those used to control for confounding                                                                                                                                                                                                                                                                                                                                                                                  | 6                  |
|                           |        | (b) Describe any methods used to examine subgroups and interactions                                                                                                                                                                                                                                                                                                                                                                                                    | 6                  |
|                           |        | (c) Explain how missing data were addressed                                                                                                                                                                                                                                                                                                                                                                                                                            | Not applicable     |
|                           |        | (d) <i>Cohort study</i> —If applicable, explain how loss to follow-up was addressed<br><i>Case-control study</i> —If applicable, explain how matching of cases and controls was addressed                                                                                                                                                                                                                                                                              | Not applicable     |

|                          |     |                                                                                                                                                                                                              |                |
|--------------------------|-----|--------------------------------------------------------------------------------------------------------------------------------------------------------------------------------------------------------------|----------------|
|                          |     | <i>Cross-sectional study</i> —If applicable, describe analytical methods taking account of sampling strategy                                                                                                 |                |
|                          |     | (e) Describe any sensitivity analyses                                                                                                                                                                        | Not applicable |
| <b>Results</b>           |     |                                                                                                                                                                                                              |                |
| Participants             | 13* | (a) Report numbers of individuals at each stage of study—eg numbers potentially eligible, examined for eligibility, confirmed eligible, included in the study, completing follow-up, and analysed            | 6              |
|                          |     | (b) Give reasons for non-participation at each stage                                                                                                                                                         | 6              |
|                          |     | (c) Consider use of a flow diagram                                                                                                                                                                           | Not applicable |
| Descriptive data         | 14* | (a) Give characteristics of study participants (eg demographic, clinical, social) and information on exposures and potential confounders                                                                     | 6, 8-9         |
|                          |     | (b) Indicate number of participants with missing data for each variable of interest                                                                                                                          | 6              |
|                          |     | (c) <i>Cohort study</i> —Summarise follow-up time (eg, average and total amount)                                                                                                                             | Not applicable |
| Outcome data             | 15* | <i>Cohort study</i> —Report numbers of outcome events or summary measures over time                                                                                                                          | Not applicable |
|                          |     | <i>Case-control study</i> —Report numbers in each exposure category, or summary measures of exposure                                                                                                         | Not applicable |
|                          |     | <i>Cross-sectional study</i> —Report numbers of outcome events or summary measures                                                                                                                           | Not applicable |
| Main results             | 16  | (a) Give unadjusted estimates and, if applicable, confounder-adjusted estimates and their precision (eg, 95% confidence interval). Make clear which confounders were adjusted for and why they were included | 6-7, 10        |
|                          |     | (b) Report category boundaries when continuous variables were categorized                                                                                                                                    | Not applicable |
|                          |     | (c) If relevant, consider translating estimates of relative risk into absolute risk for a meaningful time period                                                                                             | Not applicable |
| Other analyses           | 17  | Report other analyses done—eg analyses of subgroups and interactions, and sensitivity analyses                                                                                                               | Not applicable |
| <b>Discussion</b>        |     |                                                                                                                                                                                                              |                |
| Key results              | 18  | Summarise key results with reference to study objectives                                                                                                                                                     | 11-13          |
| Limitations              | 19  | Discuss limitations of the study, taking into account sources of potential bias or imprecision. Discuss both direction and magnitude of any potential bias                                                   | 13             |
| Interpretation           | 20  | Give a cautious overall interpretation of results considering objectives, limitations, multiplicity of analyses, results from similar studies, and other relevant evidence                                   | 13             |
| Generalisability         | 21  | Discuss the generalisability (external validity) of the study results                                                                                                                                        | 13             |
| <b>Other information</b> |     |                                                                                                                                                                                                              |                |
| Funding                  | 22  | Give the source of funding and the role of the funders for the present study and, if applicable, for the original study on which the present article is based                                                | 14             |

\*Give information separately for cases and controls in case-control studies and, if applicable, for exposed and unexposed groups in cohort and cross-sectional studies.

**Note:** An Explanation and Elaboration article discusses each checklist item and gives methodological background and published examples of transparent reporting. The STROBE checklist is best used in conjunction with this article (freely available on the Web sites of PLoS Medicine at <http://www.plosmedicine.org/>, Annals of Internal Medicine at <http://www.annals.org/>, and Epidemiology at <http://www.epidem.com/>). Information on the STROBE Initiative is available at [www.strobe-statement.org](http://www.strobe-statement.org).

# BMJ Open

## Dietary intake, physical activity and muscle strength among adolescents: the Malaysian Health and Adolescents Longitudinal Research Team (MyHeART) study

|                                 |                                                                                                                                                                                                                                                                                                                                                                                                                                                                                                                                                  |
|---------------------------------|--------------------------------------------------------------------------------------------------------------------------------------------------------------------------------------------------------------------------------------------------------------------------------------------------------------------------------------------------------------------------------------------------------------------------------------------------------------------------------------------------------------------------------------------------|
| Journal:                        | <i>BMJ Open</i>                                                                                                                                                                                                                                                                                                                                                                                                                                                                                                                                  |
| Manuscript ID                   | bmjopen-2018-026275.R1                                                                                                                                                                                                                                                                                                                                                                                                                                                                                                                           |
| Article Type:                   | Research                                                                                                                                                                                                                                                                                                                                                                                                                                                                                                                                         |
| Date Submitted by the Author:   | 15-Jan-2019                                                                                                                                                                                                                                                                                                                                                                                                                                                                                                                                      |
| Complete List of Authors:       | Ng, Ai Kah; University of Malaya Faculty of Medicine, Centre for Population Health and Dept of Social and Preventive Medicine; International Medical University School of Health Sciences, Nutrition and Dietetics<br>Hairi, Noran; University of Malaya, JCUM and Dept Social and Preventive Medicine<br>Jalaludin, Muhammad Yazid; University of Malaya, Department of Paediatrics<br>Majid, Hazreen; University of Malaya Faculty of Medicine, Social and Preventive Medicine; Harvard University T H Chan School of Public Health, Nutrition |
| <b>Primary Subject Heading</b>: | Public health                                                                                                                                                                                                                                                                                                                                                                                                                                                                                                                                    |
| Secondary Subject Heading:      | Paediatrics, Nutrition and metabolism                                                                                                                                                                                                                                                                                                                                                                                                                                                                                                            |
| Keywords:                       | Hand grip strength, Dietary intake, Adolescents, Physical activity, muscle strength                                                                                                                                                                                                                                                                                                                                                                                                                                                              |
|                                 |                                                                                                                                                                                                                                                                                                                                                                                                                                                                                                                                                  |

SCHOLARONE™  
Manuscripts

1  
2  
3 *Research article*  
4  
5

6 **Dietary intake, physical activity and muscle strength among adolescents: the Malaysian**  
7 **Health and Adolescents Longitudinal Research Team (MyHeART) study**  
8  
9

10  
11  
12  
13  
14 AK Ng<sup>1</sup>, NN Hairi<sup>3</sup>, MY Jalaludin<sup>4</sup>, HA Majid<sup>1,2</sup>  
15  
16

17  
18  
19  
20 <sup>1</sup> Centre for Population Health (CePH), Department of Social and Preventive Medicine, Faculty of  
21 Medicine, University Malaya, 50603 Kuala Lumpur, Malaysia.  
22

23  
24  
25 <sup>2</sup> Department of Nutrition, Harvard Chan School of Public Health, 677 Huntington Avenue, Boston  
26 MA 02115 (present address)  
27  
28

29  
30  
31 <sup>3</sup> Julius Centre University of Malaya (JCUM), Department of Social and Preventive Medicine  
32 Faculty of Medicine, University Malaya, 50603 Kuala Lumpur, Malaysia.  
33  
34

35  
36 <sup>4</sup> Department of Paediatrics, Faculty of Medicine, University Malaya, 50603 Kuala Lumpur,  
37 Malaysia.  
38  
39  
40  
41  
42  
43  
44  
45  
46  
47  
48  
49  
50  
51  
52  
53  
54  
55  
56  
57  
58  
59  
60

1  
2  
3 **Contact number, email addresses and postal addresses for each author:**  
4  
5

6 Noran Naqiah Hairi:

7  
8  
9 Contact no: +603-79674762  
10

11  
12 Email address: [noran@ummc.edu.my](mailto:noran@ummc.edu.my)  
13

14  
15 Postal address: Department of Social and Preventive Medicine, Faculty of Medicine,  
16  
17 University of Malaya, 50603 Kuala Lumpur, Malaysia  
18  
19

20  
21  
22  
23 Muhammad Yazid Jalaludin:

24  
25  
26 Contact no: +603-79492417  
27

28  
29 Email address: [yazidj@ummc.edu.my](mailto:yazidj@ummc.edu.my)  
30

31  
32 Postal address: Department of Paediatrics, Faculty of Medicine, University of Malaya,  
33  
34 50603 Kuala Lumpur, Malaysia  
35  
36

37  
38  
39  
40 Ng Ai Kah:

41  
42  
43 Phd Candidate  
44

45  
46 Contact no: +6017-3846869  
47

48  
49 Email address: [ngaikah@siswa.um.edu.my](mailto:ngaikah@siswa.um.edu.my)  
50

51  
52 Postal address: Department of Social and Preventive Medicine, Faculty of Medicine,  
53  
54 University of Malaya, 50603 Kuala Lumpur, Malaysia  
55  
56

**Corresponding author:**

Majid HA, Associate Professor, PhD, RD, Faculty of Medicine, Department of Social and Preventive Medicine, University of Malaya, Kuala Lumpur, Malaysia

E-mail: [hazreen@ummc.edu.my](mailto:hazreen@ummc.edu.my)

[hazreen.abdulmajid@gmail.com](mailto:hazreen.abdulmajid@gmail.com)

**Word Count**, excluding title page, abstract, references, figures and tables: 4000 words.

**Tables:** 3

**Figure:** 1

**Funding Statement:** This study was supported by funding received from the University Malaya's Research Programme (UMRP022A-14HTM) and Postgraduate Research Fund (PG026-2016A).

**Funding**

University of Malaya Research Grant (UMRP022A-14HTM), UMSC grant cycle 1-2016 and all the school children who participated in this study. The funding bodies did not contribute to the design of the study, data collection, analysis, or interpretation of data.



1  
2  
3 **Disclosure:** The authors declare that they have no conflict of interests.  
4  
5

6 **Author Contributions/ Statement of authorship:** AK Ng, HA Majid and NN Hairi carried out  
7  
8 the data analysis. AK Ng drafted the manuscript. HA Majid and MY Jalaludin contributed in the  
9  
10 design of the study and data collection. All authors contributed to the final manuscript write up.  
11  
12  
13  
14  
15

### 16 **Ethics approval and consent to participate**

17  
18  
19 Ethical approval was obtained from the Medical Ethics Committee, University Malaya Medical  
20  
21 Centre (MEC Ref. No: 896.34). The National Medical Research Register number is 14-376-20486.  
22  
23  
24 Participation in the study was voluntary and written informed consent and ascent for participation  
25  
26 in the study was obtained from the parents or guardian as well as the participants.  
27  
28  
29  
30  
31  
32  
33  
34  
35  
36  
37  
38  
39  
40  
41  
42  
43  
44  
45  
46  
47  
48  
49  
50  
51  
52  
53  
54  
55  
56  
57  
58  
59  
60

1  
2  
3 **Title: Dietary intake, physical activity and muscle strength among adolescents: the**  
4 **Malaysian Health and Adolescents Longitudinal Research Team (MyHeART) study**  
5  
6  
7

8 **ABSTRACT**  
9

10 **Objective:** To examine the role of dietary intake and physical activity in muscle strength among  
11 adolescents.  
12

13 **Design:** Cross-sectional analysis.  
14

15 **Setting:** The Malaysian Health and Adolescents Longitudinal Research Team (MyHeART) study.  
16

17 **Participants:** Fifteen-year-old secondary school children who have given consent and who  
18 participated in the MyHeART study in 2014.  
19

20 **Primary outcome measure:** Muscle strength was measured in relation to dietary intake (energy  
21 and macronutrients) and physical activity by using a hand grip dynamometer.  
22

23 **Results:** Among the 1012 participants (395 male; 617 female), the hand grip strength of the males  
24 was higher than that of the females (27.08 kg vs 18.63 kg;  $p<0.001$ ). Also, males were more active  
25 (2.43 vs 2.12;  $p<0.001$ ) and consumed a higher amount energy (2047 kcal vs 1738 kcal,  $p<0.001$ ),  
26 carbohydrate (280.71 g vs 229.31 g;  $p<0.001$ ) and protein (1.46g/kgBW vs 1.35g/kgBW;  
27  $p<0.168$ ). After controlling for ethnicity, place of residency and body mass index (BMI), there was  
28 a positive relationship between hand grip strength and the intake of energy ( $r=0.14$ ;  $p=0.006$ ),  
29 carbohydrate ( $r=0.153$ ;  $p=0.002$ ) and fat ( $r=0.124$ ;  $p=0.014$ ) and the physical activity score  
30 ( $r=0.170$ ;  $p=0.001$ ) and a negative relationship between hand grip strength and the intake of  
31 protein ( $r=-0.134$ ;  $p=0.008$ ), for males. However, this was not observed among females.  
32  
33  
34

35 **Conclusions:** Energy, carbohydrate and fat intakes and physical activity score were positively  
36 correlated with hand grip strength while protein intake was negatively correlated with hand grip  
37 strength in males but not in females.  
38  
39  
40

41 **Keywords:** Muscle strength, Hand grip strength, Dietary intake, Physical activity, Adolescents  
42  
43  
44  
45  
46  
47  
48  
49  
50  
51  
52  
53  
54  
55  
56  
57  
58  
59  
60

## ARTICLE SUMMARY

### Article focus

- Muscle strength, as measured by hand grip strength, is an important indicator of health-related outcomes among adolescents.
- The potential effect of dietary intake on the muscle strength of adolescents is investigated.

### Key messages

- After controlling for ethnicity, place of residency and body mass index, the results show that greater intake of energy, carbohydrate and fat and a higher physical activity score are associated with greater hand grip strength in males. However, this was not observed in females.
- The results also show that energy intake and physical activity score have positive effects on male hand grip strength after controlling for body mass index.

### Strengths and limitations of this study

- The main strengths of this study are that it used a large sample of adolescents and the standardised measurement of muscle strength.
- This study is also the first to investigate the association between dietary intake, physical activity and muscle strength among adolescents in Asia.
- The main limitations of this study are that the sample covers a limited age range and the cross-sectional design of the study does not allow any causality interpretations.

## INTRODUCTION

Recent research has paid much attention to poor muscles strength among adolescents and its association with adverse health-related outcomes, including cardiovascular disease,<sup>1</sup> poorer metabolic profile,<sup>2-4</sup> obesity<sup>5 6</sup> and musculoskeletal pain<sup>7</sup> as well as premature death from any cause.<sup>1</sup> Furthermore, a cross-sectional study among adolescents in a city in southern Brazil reported a prevalence of low muscle strength of 47% among the study population.<sup>8</sup> Moreover, most studies have suggested that there is a declining trend of muscle strength among adolescents over time<sup>9-12</sup> except for a study conducted in Colombia<sup>13</sup> that indicated otherwise. The study in Colombia, a middle-income country, also found that, adolescents have a lower hand grip strength compared to those in high-income countries.<sup>13</sup> Similarly, a preliminary finding from the MyHeART study showed that Malaysian adolescents have a lower handgrip strength than those in other countries.<sup>9 14 15</sup> However, it was not possible to categorise the hand grip strength of Malaysian adolescents based on the cutoff values used<sup>8</sup> as there were no available normal values for Asian adolescents. Moreover, the published cutoff values should not be used as the reference standard for Asian populations because most Asians are not able to achieve the published cutoff values.<sup>16</sup>

Issues pertaining to unhealthy dietary intake<sup>17</sup> and low physical activity<sup>18</sup> among adolescents are well documented worldwide. In fact, dietary intake and/or low physical activity are increasingly recognised to be modifiable health-related behavioural determinants of muscle strength among adolescents.<sup>15 19-21</sup> the results reported by population-based cohort studies regarding the effect of energy and macronutrient intake are limited at this point in time.<sup>15 22</sup> For instance, a cross-sectional study that was conducted among European adolescents found that specific amino acids are associated with muscle strength; however, when carbohydrate is controlled for, these relationships disappear.<sup>15</sup> Another cohort study from India in which pregnant women and children were given a balanced protein-calorie supplementation and the children were followed up at adult stage, also emphasised the importance of an adequate energy intake in order to increase muscle strength. The cohort study also found that energy intake and physical activity are positively associated with muscle strength.<sup>22</sup> Furthermore, an experimental study on adolescents found that milk supplementation with resistance training does not change body composition.<sup>23</sup> However, the authors argued that it could be due to energy intake playing a vital role in the relationship between body composition, resistance training and the effect of these factors on both muscle mass and strength.<sup>23</sup>

In view of the changes that take place in the skeletal muscle in response to energy and macronutrient intake particularly carbohydrate and protein intake, in normal physiology<sup>24</sup>, it is worthwhile to further investigate the relationship between dietary intake, particularly energy and macronutrients, and muscle strength. While previous studies have provided some evidences to demonstrate that low level of physical activity level<sup>18 25</sup> and being overweight<sup>8</sup> are associated with low hand grip strength, it seems that no studies have evaluated the influence of dietary intake and physical activity on hand grip strength among adolescents specifically. Thus, the relationship between dietary intake, physical activity and muscle strength among adolescents is not yet well understood. Moreover, to the best of the authors' knowledge, only a limited number of studies have investigated the association between hand grip strength, dietary intake and/or physical

1  
2  
3 activity among adolescents, particularly in Asia. Therefore, the purpose of this paper is to examine  
4 the association between hand grip strength, dietary intake and physical activity among adolescents  
5 in Malaysia.  
6  
7  
8

## 9 10 **METHODS**

11 This cross-sectional study is a secondary analysis of data derived from the first follow-up of the  
12 Malaysian Health and Adolescents Longitudinal Research Team (MyHeART) study. The  
13 population for the current study was comprised of 15-year-old adolescents attending public  
14 secondary schools in the central and northern regions of Peninsular Malaysia. The sampling  
15 method used was multistage random sampling. The primary sampling units were the schools and  
16 the secondary sampling units were the students. In the first stage, the study frame was a complete  
17 list of public schools in the two above-mentioned regions from which total of 15 public secondary  
18 schools were selected. In the second stage, the defined study population was selected from a  
19 complete list of Form Three students in each of the selected school. Full details of the original  
20 MyHeART study protocol have been published elsewhere.<sup>26</sup>  
21  
22  
23  
24  
25

26 In 2014, 1230 adolescents were recruited for the MyHeART study. Out of the total participants in  
27 2014, 1012 (82.3%) were included in the analysis for this paper. A flowchart of the sampling  
28 procedure used to select the participants for this study is provided in Figure 1.  
29  
30  
31

32 The MyHeART study was approved by the Ethics Committee of the University Malaya Medical  
33 Centre (MEC Ref. No. 896.34). Subsequently, formal approval was obtained from the Ministry of  
34 Health and Ministry of Education and then approval was sought from the relevant state level  
35 administrative authorities before approaching the Headmasters and Headmistresses of the selected  
36 schools.  
37  
38  
39  
40

41 The data collection was conducted by the MyHeART team, which was led by the principal  
42 investigator. The team consisted of 20 research assistants (medical doctors, nurses and dietitians)  
43 who collected the data at various stations such as anthropometry, hand grip strength and dietary  
44 stations. The data was collected between March and May in 2014. Prior to conducting data  
45 collection, Principle Investigator provided orientation and training sessions for the research  
46 assistants in order to familiarise them with the objectives and methodology of the study as well as  
47 hands-on practice in measuring the anthropometrics and hand grip strength. In addition, the  
48 researcher assistants who were dietitians received training on how to conduct the seven-days diet  
49 history using standardised portion of food and how to translate the diet history into a coding sheet  
50 in order to ensure the consistency and quality of the collected data.  
51  
52  
53  
54  
55  
56  
57  
58  
59  
60

## Muscle strength

Hand grip strength has been shown to have moderate to strong validity and high reliability in tests for upper body and lower body strength in adolescents.<sup>27</sup> Moreover, hand grip strength has been found to be valid, reliable and feasible for school setting.<sup>28</sup> Therefore muscle strength was assessed by using hand grip strength. A calibrated hand dynamometer (Jamar, Sammons Preston Rolyan, Illinois, US), whose unit of measurement is the kilogram, was used in the assessment of hand grip strength. The strength of the dominant and the non-dominant hand was recorded. Prior to the measurements being taken, the dynamometer was calibrated. Then, it was adjusted for different hand sizes. The dominant and non-dominant hands of the participants were each tested three times and the readings were recorded to the nearest 0.1 kg. The average of the three readings for the dominant hand was used in analysis. All the measurements were done by trained research assistants.

## Dietary intakes

Dietary intake was assessed by using a 7-day diet history. The diet history is the best method by which to estimate adolescents' intakes because they can better recall what they have eaten and drunk and this history can thus reveal more accurate information about their overall intakes.<sup>29</sup> This method also shows less variation in dietary assessment from the epidemiological perspective<sup>30</sup> and is more representative of adolescents' habitual intakes than other methods.<sup>31 32</sup> The seven-day diet history was collected by trained research assistants who were qualified dietitians. The *Nutrient Composition of Malaysian Food* (4th edition)<sup>33</sup> was used to calculate energy and macronutrient intakes and the values were entered into the Nutritionist Pro™ database (Axxya Systems, USA).<sup>33</sup> The intakes from food items and recipes that could not be found in the *Nutrient Composition of Malaysian Food* were calculated on the basis of the details provided by the food packaging and the recipe. These calculations were then entered into the database by adjusting them based on standard recipes (per serving size). After the diet history had been analysed, 10% of the data was randomly cross-checked by an independent qualified dietitian who was not involved in analysing the dietary data. The margin of error was 4.4%. It was seemed acceptable as it has been stated that a 10% margin of error is acceptable.<sup>34</sup> Implausible energy intakes <500 kcal/day or >5000 kcal/day were excluded from this analysis.<sup>35</sup>

## Physical activity score

A Malay version of the validated physical activity questionnaire for older children (PAQ-C) consisting of 10 items was used to obtain the physical activity level of the adolescents over the past 7 days. The PAC-Q questionnaire has been shown to be valid and to have good internal consistency.<sup>36-38</sup> The translated version has been validated in a local setting, achieving an  $\alpha$ -Cronbach of 0.79.<sup>39</sup> The first item in the questionnaire was used to assess the type and frequency of sports and/or dance activities in which the adolescents took part. The second to eighth were used to assess the activity of the adolescents during physical education classes, recess, lunchtime,

1  
2  
3 immediately after school, in the evenings, at the weekend and during leisure time. A five-point  
4 Likert scale 1 [lowest] to 5 [highest] was used for the second to eighth items. The ninth item was  
5 used to assess their physical activity frequency. The tenth item was used to gather information on  
6 any unusual activities that the adolescents undertook during those 7 days. The results obtained  
7 from the PAQ-C were categorised following Crocker et al (1997) into low (<2.33), moderate (2.33-  
8 3.66) and high (>3.66).<sup>40</sup>  
9  
10

### 11 12 13 **Anthropometric measures**

14  
15 Body weight was measured by using a digital electronic weighing scale (Seca 813, Seca, UK) and  
16 recorded to the nearest 0.1 kg. Height was measured without socks and shoes by using a calibrated  
17 vertical stadiometer (Seca Portable 217, Seca, UK) and recorded to the nearest 0.1 cm. Body mass  
18 index was calculated as weight in kilograms divided by the square of height in metres. Waist  
19 circumference (midpoint between the lowest rib margin and the iliac crest) was measured by using  
20 a non-elastic measuring tape (Seca 201, Seca, UK) and recorded to the nearest 0.1 cm. Percentage  
21 body fat was measured by using a bioelectric impedance analyser (SC-240, Body Composition  
22 Analyser, Tanita Europe BV, The Netherlands).  
23  
24  
25  
26  
27

### 28 **Sociodemographic measures**

29 Sociodemographic measures were collected via parental and student questionnaires which  
30 included questions on age, ethnicity and place of residency.  
31  
32  
33  
34

### 35 **Statistical analyses**

36 Analyses were performed using the Statistical Package for Social Sciences software for Windows  
37 version 22.0 (IBM, Chicago, IL, USA) and the significance level was set at  $p < 0.05$ . The analyses  
38 were performed separately by gender. Normality and skewness tests were used to assess normal  
39 distribution. All variables showed a normal distribution, except for weight, waist circumference  
40 and BMI. Data was presented as means and standard deviations for normally distributed  
41 continuous variables, medians and interquartile ranges (IQRs) for non-normally distributed  
42 continuous variables and percentages for categorical variables. The independent t-test was used to  
43 examine gender differences for normally distributed variables and the Mann-Whitney U test was  
44 used for non-normally distributed variables. The association between hand grip strength and (i)  
45 energy intake, (ii) macronutrient intake and (iii) physical activity score was assessed by using  
46 Pearson's correlation coefficient. The hand grip strength of the dominant hand was entered as the  
47 dependent variable and (i) energy and macronutrient intake and (ii) physical activity score were  
48 entered as the independent variables while controlling for ethnicity, place of residency and BMI.  
49 Body mass index was chosen as the covariate despite there being several other indicators of obesity  
50 because BMI is able to discriminate body fatness in adolescents.<sup>41</sup> In addition, linear regression  
51  
52  
53  
54  
55  
56  
57  
58  
59  
60



was used to investigate whether dietary intake and physical activity could predict hand grip strength when controlling for ethnicity, place of residency and BMI.

### **Patient and public involvement**

An information sheet and consent forms were given to the students and their parents/guardian prior to recruitment. Participation in the study was on a voluntary basis. A feasibility study was done prior to the actual study and its findings assisted in ensuring the flow of the actual study and data collection. Each participant was given a record book in which the relevant results such as weight, height and hand grip strength were recorded.

## **RESULTS**

### **Descriptive analysis**

Table 1 provides the characteristics of the participants. It can be seen that males had significantly higher values than females in terms of weight, physical activity score, hand grip strength of both hands, and energy and carbohydrate intakes per day, but not in percentage body fat and BMI ( $p < 0.05$ ). About two thirds (69.2%) of the females had a low physical activity score, whereas almost two thirds of the males (65.2%) had a moderate to high physical activity score.

### **Correlation and regression**

Table 2 shows that a positive linear relationship was found between energy, carbohydrate, and fat intakes and physical activity score and the dependent variable hand grip strength ( $p < 0.001$ ) among males. However, no such correlation was found in females.

To investigate whether dietary intake and physical activity could predict hand grip strength, a linear regression was computed while controlling for ethnicity, place of residency and BMI. Before running the regressions, the assumptions of linearity, normally distributed errors and non-correlated errors were checked and met. When the physical activity score and energy intake were added, both variables significantly predicted hand grip strength:  $F(3, 391) = 26.318$ ,  $p < 0.001$ , adjusted  $R^2 = 0.162$  (Table 3). When physical factors (length of dominant hand span and height) were entered, the prediction improved with an adjusted  $R^2$  of 0.339.

**Table 1: Characteristics of MyHeART participants**

|                                             | <b>Male</b><br><b>(n=395)</b> | <b>Female</b><br><b>(n=617)</b> | <b>All</b><br><b>(n=1012)</b> | <b>p</b> |
|---------------------------------------------|-------------------------------|---------------------------------|-------------------------------|----------|
| <b>Age (y)</b>                              | 15.04 (±0.198)                | 15.04 (±0.205)                  | 15.04 (±0.202)                | 0.384    |
| <b>Ethnicity</b>                            |                               |                                 |                               |          |
| Malay                                       | 307 (77.7%)                   | 487 (78.9%)                     | 795 (78.6%)                   | 0.495    |
| Chinese                                     | 26 (6.6%)                     | 47 (7.6%)                       | 73 (7.2%)                     |          |
| Indian                                      | 35 (8.9%)                     | 54 (8.8%)                       | 89 (8.8%)                     |          |
| Others                                      | 27 (6.8%)                     | 29 (4.7%)                       | 56 (5.5%)                     |          |
| <b>Place of residency</b>                   |                               |                                 |                               |          |
| Urban                                       | 216 (54.7%)                   | 367 (59.5%)                     | 583 (57.6%)                   | 0.132    |
| Rural                                       | 179 (45.3%)                   | 250 (40.5%)                     | 429 (42.4%)                   |          |
| <b>Weight<sup>a</sup> (kg)</b>              | 51.00 (17.00)                 | 48.50 (15.35)                   | 49.50 (15.60)                 | <0.001*  |
| <b>Height (cm)</b>                          | 163.20 (±6.76)                | 154.65 (±5.67)                  | 157.99 (±7.40)                | 0.052    |
| <b>BMI<sup>a</sup> (kg/m<sup>2</sup>)</b>   | 18.90 (5.49)                  | 20.25 (5.74)                    | 19.74 (5.73)                  | <0.001*  |
| <b>% body fat</b>                           | 15.50 (±11.02)                | 29.37 (±9.17)                   | 23.95 (±12.01)                | <0.001*  |
| <b>Waist circumference<sup>a</sup> (cm)</b> | 67.90 (15.50)                 | 69.00 (13.50)                   | 68.50 (14.00)                 | 0.514    |

*Differences between male and female participants were determined using an independent t-test and the Mann-Whitney test. Data are presented as means ± standard deviation or as n (%), unless otherwise stated.*

*\*Statistically significant at p<0.05.*

*<sup>a</sup>Values are expressed as medians (IQRs).*

**Table 1: Characteristics of MyHeART participants (cont...)**

|                                                        | <b>Male</b><br><b>(n=395)</b> | <b>Female</b><br><b>(n=617)</b> | <b>All</b><br><b>(n=1012)</b> | <b>p</b> |
|--------------------------------------------------------|-------------------------------|---------------------------------|-------------------------------|----------|
| <b>Physical activity score</b>                         | 2.43 (±0.75)                  | 2.12 (±0.54)                    | 2.24 (±0.65)                  | <0.001*  |
| <b>Physical activity level</b>                         |                               |                                 |                               |          |
| low (<2.33)                                            | 177 (44.8%)                   | 427 (69.2%)                     | 604 (59.7%)                   | <0.001*  |
| moderate (2.33-3.66)                                   | 199 (50.4%)                   | 183 (29.7%)                     | 382 (37.7%)                   |          |
| high (>3.66)                                           | 19 (4.8%)                     | 7 (1.1%)                        | 26 (2.6%)                     |          |
| <b>Hand grip strength (kg)</b>                         |                               |                                 |                               |          |
| Average hand grip strength<br>(dominant hand) (kg)     | 27.25 (±7.16)                 | 18.73 (±4.63)                   | 22.06 (±7.09)                 | <0.001*  |
| Average hand grip strength<br>(non-dominant hand) (kg) | 25.77 (±7.34)                 | 17.44 (±4.72)                   | 20.69 (±7.15)                 |          |
| <b>Energy &amp; macronutrients intake</b>              |                               |                                 |                               |          |
| Energy (kcal)                                          | 2047 (±583)                   | 1738 (±474)                     | 1858 (±540)                   | 0.001*   |
| Protein (g)                                            | 75.69 (±22.48)                | 66.07 (±19.45)                  | 69.82 (±21.20)                | 0.04*    |
| Protein (g/kg)                                         | 1.46 (±0.58)                  | 1.35 (±0.53)                    | 1.40 (±0.55)                  | 0.168    |
| Carbohydrate (g)                                       | 280.71 (±90.17)               | 229.31 (±67.79)                 | 249.37 (±81.23)               | <0.001*  |
| Fat (g)                                                | 68.97 (±21.74)                | 61.60 (±20.13)                  | 64.48 (±21.07)                | 0.16     |

*Differences between male and female participants were determined using an independent t-test and the Mann-Whitney test. Data are presented as means ± standard deviation or as n (%), unless otherwise stated.*

*\*Statistically significant at p<0.05.*

*<sup>a</sup>Values are expressed as medians (IQRs).*

**Table 2: Partial correlation (r) between dietary intake, physical activity score and hand grip strength in adolescents**

|                                         | Hand grip strength for males*<br>(n = 395) |         | Hand grip strength for females*<br>(n = 617) |       |
|-----------------------------------------|--------------------------------------------|---------|----------------------------------------------|-------|
|                                         | r                                          | P       | r                                            | p     |
| <b>Energy and macronutrients intake</b> |                                            |         |                                              |       |
| <b>Energy (kcal)</b>                    | 0.140                                      | 0.006** | 0.018                                        | 0.651 |
| <b>Protein (g/kg)</b>                   | -0.134                                     | 0.008** | -0.021                                       | 0.610 |
| <b>Carbohydrate (g)</b>                 | 0.153                                      | 0.002** | 0.026                                        | 0.528 |
| <b>Fat (g)</b>                          | 0.124                                      | 0.014** | -0.002                                       | 0.962 |
| <b>Physical activity score</b>          | 0.170                                      | 0.001** | 0.042                                        | 0.298 |

\*Controlled for ethnicity, place of residency and BMI

\*\*Statistically significant at  $p < 0.05$ .

**Table 3: Multiple linear regression model for male adolescents**

|                                | Hand grip strength of male<br>(n = 395) |         |        |
|--------------------------------|-----------------------------------------|---------|--------|
|                                | R <sup>2</sup>                          | $\beta$ | p      |
| <b>Energy intake (kcal)</b>    | 0.162                                   | 0.143   | 0.002* |
| <b>Physical activity score</b> |                                         | 0.129   | 0.006* |

\*Controlled for ethnicity, place of residency and BMI

## DISCUSSION

### Hand grip strength, dietary intake and physical activity

This study showed that the muscle strength of Malaysian adolescents is much lower than that of their counterparts as reported by studies in Europe (males:35.9kg; females:26.2kg), the United Kingdom (males:25.7kg; females:21.8kg) and Colombia of South America (males:33.6kg; females:24.9kg).<sup>9 15 42</sup> Also, according to the results, female adolescents in Malaysia have lower muscle strength than those in Beijing, China.<sup>43</sup> Unfortunately, there is no large population based Asian male adolescent data with which to compare with the results of the current study. Hence, this study can be considered the first documented muscle strength study among adolescents of both genders in Asia. Nevertheless, despite the lack of comparable studies, the trend for adolescents is similar to that reported for Malaysian adult population, where it was found the hand grip strength of Malaysian adults is 1.5 times lower than that of adults in Western countries.<sup>44</sup> Thus together with the findings of the current study, this may indicate that the muscle strength of the Malaysian population is relatively low from a young age. Indeed, the results of a longitudinal study conducted in Quebec, a province in eastern Canada, which tracked muscle strength from childhood to adulthood, suggested that low muscle strength can persist from childhood through adolescence and into adulthood.<sup>45</sup> Therefore, it seems worthwhile to detect low muscle strength at a young age and build it up in order to foster favourable health outcomes in later life.<sup>1</sup> Thus, it can be argued that low muscle strength among adolescents warrants particular attention in order to identify the root cause, especially if it is associated with dietary intake and physical activity which are both modifiable health-related behaviours.

The results of this study also showed that there were differences in hand grip strength, dietary intake and physical activity score between male and female adolescents. Specifically, the males had higher muscle strength, consumed more energy, protein and carbohydrate and were more physically active than their female counterparts. These findings are consistent with those of previous studies conducted on study populations aged 13 years-old.<sup>14 46 47</sup>

### Association between dietary intake, physical activity and hand grip strength

In this study, in males, energy, carbohydrate, and fat intakes and physical activity score were positively correlated with hand grip strength, but protein was weakly correlated (table 2). Although it has been shown that protein helps muscle protein synthesis and thus eventually improves muscle strength<sup>48</sup>, the effect of protein was not observed in this study. One possible explanation for this finding could be due to quality of protein consumed.<sup>49</sup> Often, dietary protein is ingested as a whole so it includes high biological value and low biological value and this leads to difficulty in identifying how proteins derived from animal and plant sources differ in their capacity to improve muscle mass and strength. Empirical studies have shown that at least 25 g of high quality proteins (including at least 8-10 g essential amino acids and higher leucine content) promote muscle protein

1  
2  
3 synthesis and thus result in better muscle strength.<sup>48</sup> Therefore, the specific impact of high  
4 biological value protein is worth investigating in the future.  
5

6 In addition, studies have also reported that energy plays a moderating role in muscle strength.<sup>22 23</sup>  
7 Although a study that used milk supplementation and resistance training as an intervention did not  
8 see an improvement in muscle mass, the researchers argued that energy plays a mediator role in  
9 the relationship between muscle mass, protein intake and resistance training despite the finding  
10 showing otherwise.<sup>23</sup> Therefore, a sufficient intake of energy and/or carbohydrate to meet the daily  
11 requirement is needed before protein can play a role in promoting muscle building and strength.  
12  
13

14 In the current study, when the energy intake per day and physical activity score were added into  
15 the model while controlling for BMI, both of these predictors remained significantly associated  
16 with hand grip strength. In addition, a higher energy intake and a higher physical activity score  
17 predicted a higher hand grip strength. Moreover, a higher BMI predicted a higher hand grip  
18 strength. The latter finding is consistent with that reported by a study on Southern Brazil  
19 adolescents, which found that the higher the BMI the greater the muscle strength.<sup>21</sup> Also, the  
20 researchers stated that their study population had a higher body mass, particularly muscle. As the  
21 current study did not include an objective measure for muscle mass, we considered body fat  
22 percentage and it was found that the male participants had a lower body fat percentage than the  
23 female participants. In addition, the average BMI of the (15-year-old) male participants was below  
24 the overweight level using International Obesity Task Force reference. Nevertheless, BMI is not  
25 generally regarded as a good indicator of body composition.<sup>50</sup> On the other hand, there is a general  
26 consensus that the higher the body fat, especially abdominal fat, the lower the hand grip strength.<sup>5</sup>  
27 This could be due to fat playing an inert role in muscle strength.<sup>51</sup> However, in contrast to the  
28 above-mentioned studies, a study conducted in Italy on a sample of 2411 adolescents produced a  
29 neutral result, implying that obesity does not affect muscle strength among healthy  
30 schoolchildren.<sup>52</sup> Nonetheless, the predictive equation used in the current study needs to be  
31 interpreted with caution as energy intake and physical activity only explain about 16.2% of the  
32 variation in muscle strength.  
33  
34  
35  
36  
37  
38

39 In this study, no relationship was found between dietary intake, physical activity score and hand  
40 grip strength among female adolescents. This result is similar to that reported in a study on  
41 adolescents in Europe<sup>15</sup>, which showed that proline (amino acids) is positively correlated with  
42 lower limb muscular strength but that, when carbohydrate intake is controlled for, this relationship  
43 disappears.<sup>15</sup> On the other hand, a study conducted among Kenya adolescents found that female  
44 adolescents have greater muscle strength than their male counterparts and suggested that thi was  
45 because the females undertake more household chores such as transferring water from deep wells  
46 and preparing meals, and thus have greater access to food than the males.<sup>53</sup> All such activities  
47 eventually help to build upper limb muscle strength. However, these conditions are not commonly  
48 found in Malaysia where most adolescents are school attendees. It is therefore postulated that the  
49 reason that female adolescents in this study had lower muscle strength than the males is because  
50 almost 70% of the females had a low physical activity score due to a predominantly sedentary  
51 lifestyle as compared to the males, 65% of whom had a moderate to high physical activity score.  
52  
53  
54  
55  
56  
57  
58  
59  
60

1  
2  
3 It has also been found by a previous study that females already have a lower physical activity score  
4 at an earlier age compared to males<sup>46</sup> and that this continues as they age.  
5

6 Another possible reason for the significant result observed in males but not females could be due  
7 to changes with puberty stage, where the hand grip strength of males increases tremendously at  
8 this stage as compared to females. A study has reported that at 13 years old, the hand grip strength  
9 of males and females is 17.8 kg and 14.7 kg, respectively<sup>14</sup>. Greater muscle hypertrophy is  
10 commonly found in pre-adolescent males compared with females at the same growth stage because  
11 of increasing levels of circulating androgens in the males.<sup>54</sup> Moreover, it has also been found that  
12 muscle strength increases when a male reaches puberty, which it has been argued is related to the  
13 growth spurt due to the direct action of testosterone, which has a direct anabolic effect on muscle  
14 fibres.<sup>55</sup> In the population analysed in the current study, the majority (95%) of the males has  
15 reported that they had reached the puberty stage. Thus, in addition to the males being moderately  
16 to highly physically active, the presence of testosterone could explain the marked difference in  
17 muscle strength between the male and female participants.  
18  
19  
20  
21  
22  
23

24 Although a positive effect of protein on muscle strength was not seen in this study, it is still crucial  
25 to explore the effect of dietary protein as it is known to play a role in ensuring appropriate growth  
26 during adolescence.<sup>15</sup> Furthermore, muscle building only occurs when a person is physically  
27 active because such activity triggers the digestion and better absorption of amino acids,<sup>49 56</sup> which  
28 eventually increases muscle strength. Moreover, it is crucial to ensure that energy and carbohydrate  
29 intake requirements are met before protein can even play a role in improving muscle strength. The  
30 above findings therefore indicate that there is a strong need to undertake a longitudinal study to  
31 explore whether changes in dietary intake have an impact on hand grip strength among adolescents,  
32 and such a study also needs to take into account the variables of physical activity and weight  
33 status.  
34  
35  
36

37 It is also important to acknowledge that the type of physical activity may have an influence on the  
38 hand grip strength. A cross-sectional study has suggested different types of physical activity  
39 influence hand grip strength rather than the amount of time spent in physical activity per se.<sup>57</sup>  
40 Often, studies on muscle strength have included obesity parameters such as BMI and percentage  
41 body fat. Some of these studies have found that obese adolescents exhibit lower relative muscle  
42 strength to body mass as compared to their non-obese counterparts.<sup>6 51</sup> Some studies have found  
43 otherwise.<sup>8 52 58</sup> For instance, one such study reported that girls with normal BMI have a low hand  
44 grip strength as compared to overweight/obese girls,<sup>8</sup> and the author postulated that the  
45 overweight/obese females may have increased their muscle mass due to physical growth.  
46 However, this findings and postulation needs to be interpreted cautiously because BMI does not  
47 differentiate between fat mass and fat-free mass. Moreover, the finding of that study could be due  
48 to discrepancies when examining the absolute strength and muscle strength relative to muscle mass  
49 and muscle quality. Besides dietary and physical activity factors, the literature has also shown that  
50 physical factors such as height and length of hand span can influence hand grip strength.<sup>21 59 60</sup>  
51 Although assessing the influence of physical factors was not one of this study's objectives,  
52 physical factors were found to play a role in influencing hand grip strength.  
53  
54  
55  
56  
57  
58  
59  
60



### Strengths and limitations

This study has a number of strengths. Firstly, it was conducted using a large sample of adolescents. Secondly, it used the standard protocols for hand grip strength, dietary intake and physical activity assessment as well as data monitoring processes during data collection, data entry and data analysis in order to minimise the risk of bias. Moreover, to the best of the authors's knowledge, this study may be the first to investigate the association between hand grip strength, dietary intake and physical activity among adolescents in Asia. However, it should be noted that this study is somewhat limited because it was cross-sectional in design, so the presence or otherwise of a causal relationship could not be established. In addition, the sample covered a narrow age range. Also, several variables such as dietary intake, physical activity and maturity stages were collected via self-completed questionnaire, which may be a limitation due to the potential for misreporting. However, no method is without its limitations and this method was pilot tested on adolescents, it was expected that it would be a reasonable approach. First, seven-day dietary record seemed the most appropriate in view of adolescents memory processing capability<sup>29</sup> and because other approaches such as indirect calorimetry were not possible in this population-based study. Second, the translated PAQ-C had previously been validated in a local setting.<sup>39</sup> Third, the self-reported puberty stage has been found to be reliable in a school-based survey with a weighted kappa coefficient of 0.68 for males and females.<sup>61</sup>

### CONCLUSION

The findings of this study suggest that muscle strength is associated with energy intake and physical activity among males. However, this relationship was not found in females. This difference requires further investigation in order to gain a better understanding of the issues affecting muscle strength so as to improve the provision of nutritional and physical activity strategies for the adolescent muscular health of both genders.

## ABBREVIATIONS

**BMI**            Body Mass Index

**IQR**            Interquartile range

**Acknowledgments:** The authors would like to thank Associate Professor Dr. Mohd Nahar Azmi Mohamed and Dr. 'Abqariyah Binti Yahya for the support and guidance.

**Contributors:** AK Ng, HA Majid and NN Hairi carried out the data analysis. AK Ng drafted the manuscript. HA Majid and MY Jalaludin contributed in the design of the study and data collection. All authors contributed to the final manuscript write up.

**Funding:** This study was supported by funding received from the University Malaya's Research Programme (UMRP022A-14HTM) and Postgraduate Research Fund (PG026-2016A).

**Competing interests:** None.

**Ethical approval:** Ethics Committee of the University Malaya Medical Centre (MEC Ref. No. 896.34).

**Data availability statement:** All data relevant to the study are included in the article or uploaded as supplementary information.

## REFERENCES

1. Ortega FB, Silventoinen K, Tynelius P, et al. Muscular strength in male adolescents and premature death: cohort study of one million participants. *BMJ* 2012;345:e7279.
2. Cohen D, López-Jaramillo P, Fernández-Santos J, et al. Muscle strength is associated with lower diastolic blood pressure in schoolchildren. *Preventive medicine* 2017;95:1-6.
3. Steene-Johannessen J, Anderssen SA, Kolle E, et al. Low muscle fitness is associated with metabolic risk in youth. *Med Sci Sports Exerc* 2009;41(7):1361-7. doi: 10.1249/MSS.0b013e31819aaae5
4. Blakeley CE, Van Rompay MI, Schultz NS, et al. Relationship between muscle strength and dyslipidemia, serum 25 (OH) D, and weight status among diverse schoolchildren: a cross-sectional analysis. *BMC pediatrics* 2018;18(1):23.
5. Ruiz JR, Castro-Pinero J, Artero EG, et al. Predictive validity of health-related fitness in youth: a systematic review. *Br J Sports Med* 2009;43(12):909-23. doi: 10.1136/bjsm.2008.056499
6. Thivel D, Ring-Dimitriou S, Weghuber D, et al. Muscle Strength and Fitness in Pediatric Obesity: a Systematic Review from the European Childhood Obesity Group. *Obes Facts* 2016;9(1):52-63. doi: 10.1159/000443687
7. Timpka S, Petersson IF, Zhou C, et al. Muscle strength in adolescent men and future musculoskeletal pain: a cohort study with 17 years of follow-up. *BMJ Open* 2013;3(5) doi: 10.1136/bmjopen-2013-002656
8. Silva DAS, Pelegrini A, Chula de Castro JA, et al. Low handgrip strength levels among adolescents in a city in Southern Brazil. *Journal of Bodywork & Movement Therapies* 2017 doi: <http://dx.doi.org/10.1016/j.jbmt.2017.03.004>
9. Cohen DD, Voss C, Taylor MJ, et al. Ten-year secular changes in muscular fitness in English children. *Acta Paediatr* 2011;100(10):e175-7. doi: 10.1111/j.1651-2227.2011.02318.x
10. Dos Santos FK, Prista A, Gomes TN, et al. Secular trends in physical fitness of Mozambican school-aged children and adolescents. *Am J Hum Biol* 2015;27(2):201-6. doi: 10.1002/ajhb.22638
11. Huotari PR, Nupponen H, Laakso L, et al. Secular trends in muscular fitness among Finnish adolescents. *Scand J Public Health* 2010;38(7):739-47. doi: 10.1177/1403494810384425
12. Silverman IW. The secular trend for grip strength in Canada and the United States. *J Sports Sci* 2011;29(6):599-606. doi: 10.1080/02640414.2010.547209
13. Otero J, Cohen DD, Herrera VM, et al. Sociodemographic factors related to handgrip strength in children and adolescents in a middle income country: The SALUS study. *Am J Hum Biol* 2016;29(1) doi: 10.1002/ajhb.22896
14. Majid HA, Noran H, Jalaludin MY, et al. Poster Communications ICD Granada 2016. 17th International Congress of Dietetics 2016. Granada, Spain: Spanish Journal of Human Nutrition and Dietetics, 2016.
15. Gracia-Marco L, Bel-Serrat S, Cuenca-Garcia M, et al. Amino acids intake and physical fitness among adolescents. *Amino Acids* 2017;49(6):1041-52. doi: 10.1007/s00726-017-2393-6
16. Anjum SN, Choudary P, Dimri R, et al. Comparative evaluation of grip and pinch strength in an Asian and European population. *Hand Therapy* 2012;17(1):11-14. doi: 10.1258/ht.2011.011023
17. Keats E, C., Aviva I. Rappaport, Reena Jain, et al. Diet and Eating Practices among Adolescent Girls in Low- and Middle-Income Countries: A Systemic Review. Arlington, VA: Strengthening Partnerships, Results, and Innovations in Nutrition Globally (SPRING) project., 2017.
18. World Health Organization W. Prevalence of insufficient physical activity 2018 [cited 2018 13/7/2018]. Available from: [http://www.who.int/gho/ncd/risk\\_factors/physical\\_activity\\_text/en/](http://www.who.int/gho/ncd/risk_factors/physical_activity_text/en/) accessed 13/7/2018 2018.

19. Martinez-Gomez D, Eisenmann JC, Gomez-Martinez S, et al. Associations of physical activity and fitness with adipocytokines in adolescents: the AFINOS Study. *Nutrition, Metabolism and Cardiovascular Diseases* 2012;22(3):252-59.
20. Agostinis-Sobrinho C, Abreu S, Moreira C, et al. Muscular fitness, adherence to the Southern European Atlantic Diet and cardiometabolic risk factors in adolescents. *Nutr Metab Cardiovasc Dis* 2017;27(8):695-702. doi: 10.1016/j.numecd.2017.04.008 [published Online First: 2017/07/04]
21. Silva DAS, Martins PC. Impact of physical growth, body adiposity and lifestyle on muscular strength and cardiorespiratory fitness of adolescents. *Journal of Bodywork and Movement Therapies* 2017 doi: 10.1016/j.jbmt.2017.01.007
22. Kulkarni B, Kuper H, Radhakrishna KV, et al. The association of early life supplemental nutrition with lean body mass and grip strength in adulthood: evidence from APCAPS. *Am J Epidemiol* 2014;179(6):700-9. doi: 10.1093/aje/kwt332
23. Lambourne K, Washburn R, Lee J, et al. A 6-month trial of resistance training with milk supplementation in adolescents: effects on body composition. *International journal of sport nutrition and exercise metabolism* 2013;23(4):344-56.
24. Argilés JM, Campos N, Lopez-Pedrosa JM, et al. Skeletal muscle regulates metabolism via interorgan crosstalk: roles in health and disease. *Journal of the American Medical Directors Association* 2016;17(9):789-96.
25. Otero J, Cohen DD, Herrera VM, et al. Sociodemographic factors related to handgrip strength in children and adolescents in a middle income country: The SALUS study. *Am J Hum Biol* 2017;29(1) doi: 10.1002/ajhb.22896 [published Online First: 2016/07/19]
26. Hazreen MA, Su TT, Jalaludin MY, et al. An exploratory study on risk factors for chronic non-communicable diseases among adolescents in Malaysia: overview of the Malaysian Health and Adolescents Longitudinal Research Team study (The MyHeART study). *BMC Public Health* 2014;14 Suppl 3:S6. doi: 10.1186/1471-2458-14-S3-S6
27. Wind AE, Takken T, Helder PJ, et al. Is grip strength a predictor for total muscle strength in healthy children, adolescents, and young adults? *Eur J Pediatr* 2010;169(3):281-7. doi: 10.1007/s00431-009-1010-4
28. Pillsbury L, Oria M, Pate R. Fitness measures and health outcomes in youth: National Academies Press 2013.
29. Burrows TL, Martin RJ, Collins CE. A systematic review of the validity of dietary assessment methods in children when compared with the method of doubly labeled water. *J Am Diet Assoc* 2010;110(10):1501-10. doi: 10.1016/j.jada.2010.07.008
30. Willett W. Nutritional epidemiology: Oxford University Press 2012.
31. Livingstone MB, Prentice AM, Coward WA, et al. Validation of estimates of energy intake by weighed dietary record and diet history in children and adolescents. *The American journal of clinical nutrition* 1992;56(1):29-35.
32. Livingstone MBE, Robson PJ, Wallace JMW. Issues in dietary intake assessment of children and adolescents. *British Journal of Nutrition* 2004;92(S2):S213-S22.
33. Tee ES, Noor MI, Azudin MN, et al. The Nutrient Composition of Malaysian Food (4th edition)1997.
34. Day S, Fayers P, Harvey D. Double Data Entry: What Value, What Price? *Controlled Clinical Trials* 1998;19(1):15-24. doi: [https://doi.org/10.1016/S0197-2456\(97\)00096-2](https://doi.org/10.1016/S0197-2456(97)00096-2)
35. Berkey CS, Rockett HR, Field AE, et al. Activity, dietary intake, and weight changes in a longitudinal study of preadolescent and adolescent boys and girls. *Pediatrics* 2000;105(4):e56-e56.
36. Kowalski KC, Crocker PR, Faulkner RA. Validation of the physical activity questionnaire for older children. *Pediatric exercise science* 1997;9(2):174-86.

- 1
- 2
- 3
- 4 37. Dan S, Mohd N, Zalilah M. Determination of factors associated with physical activity levels among
- 5 adolescents attending school in Kuantan, Malaysia. *Malays J Nutr* 2011;17(2):175-817.
- 6 38. Nor Aini J, Poh BK, Chee WSS. Validity of a children's physical activity questionnaire (cPAQ) for the
- 7 study of bone health. *Pediatrics International* 2013;55(2):223-28.
- 8 39. Dan S, Zalilah M. Sex and ethnic differentials in physical activity levels of adolescents in Kuantan.
- 9 *Malaysian journal of nutrition* 2007;13(2):109-20.
- 10 40. Crocker P, Bailey DA, Faulkner RA, et al. Measuring general levels of physical activity: preliminary
- 11 evidence for the Physical Activity Questionnaire for Older Children. *Medicine and science in*
- 12 *sports and exercise* 1997;29(10):1344-49.
- 13 41. Pelegrini A, Silva DAS, de Lima Silva JMF, et al. Anthropometric indicators of obesity in the prediction
- 14 of high body fat in adolescents. *Revista Paulista de Pediatria (English Edition)* 2015;33(1):56-62.
- 15 doi: [https://doi.org/10.1016/S2359-3482\(15\)30031-2](https://doi.org/10.1016/S2359-3482(15)30031-2)
- 16 42. Sandercock GR, Lobelo F, Correa-Bautista JE, et al. The relationship between socioeconomic status,
- 17 family income, and measures of muscular and cardiorespiratory fitness in Colombian
- 18 schoolchildren. *The Journal of pediatrics* 2017;185:81-87. e2.
- 19 43. Foo LH, Zhang Q, Zhu K, et al. Low vitamin D status has an adverse influence on bone mass, bone
- 20 turnover, and muscle strength in Chinese adolescent girls. *J Nutr* 2009;139(5):1002-7. doi:
- 21 10.3945/jn.108.102053
- 22 44. Kamarul T, Ahmad TS, Loh W. Hand grip strength in the adult Malaysian population. *Journal of*
- 23 *Orthopaedic Surgery* 2006;14(2):172-77.
- 24 45. Trudeau F, Shephard RJ, Arseneault F, et al. Tracking of physical fitness from childhood to adulthood.
- 25 *Canadian Journal of Applied Physiology* 2003;28(2):257-71.
- 26 46. Su TT, Sim PY, Nahar AM, et al. Association between self-reported physical activity and indicators of
- 27 body composition in Malaysian adolescents. *Prev Med* 2014;67:100-5. doi:
- 28 10.1016/j.ypmed.2014.07.001
- 29 47. Majid HA, Ramli L, Ying SP, et al. Dietary Intake among Adolescents in a Middle-Income Country: An
- 30 Outcome from the Malaysian Health and Adolescents Longitudinal Research Team Study (the
- 31 MyHeARTs Study). *PLoS One* 2016;11(5):e0155447. doi: 10.1371/journal.pone.0155447
- 32 48. Breen L, Phillips SM. Interactions between exercise and nutrition to prevent muscle waste during
- 33 ageing. *Br J Clin Pharmacol* 2013;75(3):708-15. doi: 10.1111/j.1365-2125.2012.04456.x
- 34 49. Strasser B, Volaklis K, Fuchs D, et al. Role of Dietary Protein and Muscular Fitness on Longevity and
- 35 Aging. *Aging and Disease* 2018;9(1):119-32. doi: 10.14336/AD.2017.0202
- 36 50. Freedman DS, Sherry B. The validity of BMI as an indicator of body fatness and risk among children.
- 37 *Pediatrics* 2009;124(Supplement 1):S23-S34.
- 38 51. Tomlinson DJ, Erskine RM, Morse CI, et al. The impact of obesity on skeletal muscle strength and
- 39 structure through adolescence to old age. *Biogerontology* 2016;17(3):467-83. doi:
- 40 10.1007/s10522-015-9626-4
- 41 52. Ceschia A, Giacomini S, Santarossa S, et al. Deleterious effects of obesity on physical fitness in pre-
- 42 pubertal children. *European Journal of Sport Science* 2015;16:1-8. doi:
- 43 10.1080/17461391.2015.1030454
- 44 53. Little MA. Grip strength and body composition in Turkana pastoralist children and adolescents.
- 45 *American Journal of Human Biology* 2017;29(2):e22922. doi: doi:10.1002/ajhb.22922
- 46 54. Faigenbaum AD, Kraemer WJ, Blimkie CJ, et al. Youth resistance training: updated position statement
- 47 paper from the national strength and conditioning association. *The Journal of Strength &*
- 48 *Conditioning Research* 2009;23:S60-S79.
- 49 55. McComas A, Sica R, Petito F. Muscle strength in boys of different ages. *Journal of Neurology,*
- 50 *Neurosurgery & Psychiatry* 1973;36(2):171-73.
- 51 56. Wu G. Dietary protein intake and human health. *Food & function* 2016;7(3):1251-65.
- 52
- 53
- 54
- 55
- 56
- 57
- 58
- 59
- 60

- 1  
2  
3 57. Mattioli RÁ, Cavalli AS, Ribeiro JAB, et al. Association between handgrip strength and physical  
4 activity in hypertensive elderly individuals. *Revista Brasileira de Geriatria e Gerontologia*  
5 2015;18(4):881-91.  
6  
7 58. Ravisankar P, Udupa K, Prakash ES. Correlation between body mass index and blood pressure  
8 indices, handgrip strength and handgrip endurance in underweight, normal weight and  
9 overweight adolescents. *Indian journal of physiology and pharmacology* 2005;49(4):455.  
10  
11 59. Ploegmakers JJ, Hepping AM, Geertzen JH, et al. Grip strength is strongly associated with height,  
12 weight and gender in childhood: a cross sectional study of 2241 children and adolescents  
13 providing reference values. *Journal of physiotherapy* 2013;59(4):255-61.  
14  
15 60. Jurimae T, Hurbo T, Jurimae J. Relationship of handgrip strength with anthropometric and body  
16 composition variables in prepubertal children. *Homo* 2009;60(3):225-38. doi:  
17 10.1016/j.jchb.2008.05.004  
18  
19 61. Jaruratanasirikul S, Kreetapirom P, Tassanakijpanich N, et al. Reliability of pubertal maturation self-  
20 assessment in a school-based survey. *Journal of Pediatric Endocrinology and Metabolism*,  
21 2015:367.  
22  
23  
24  
25  
26  
27  
28  
29  
30  
31  
32  
33  
34  
35  
36  
37  
38  
39  
40  
41  
42  
43  
44  
45  
46  
47  
48  
49  
50  
51  
52  
53  
54  
55  
56  
57  
58  
59  
60

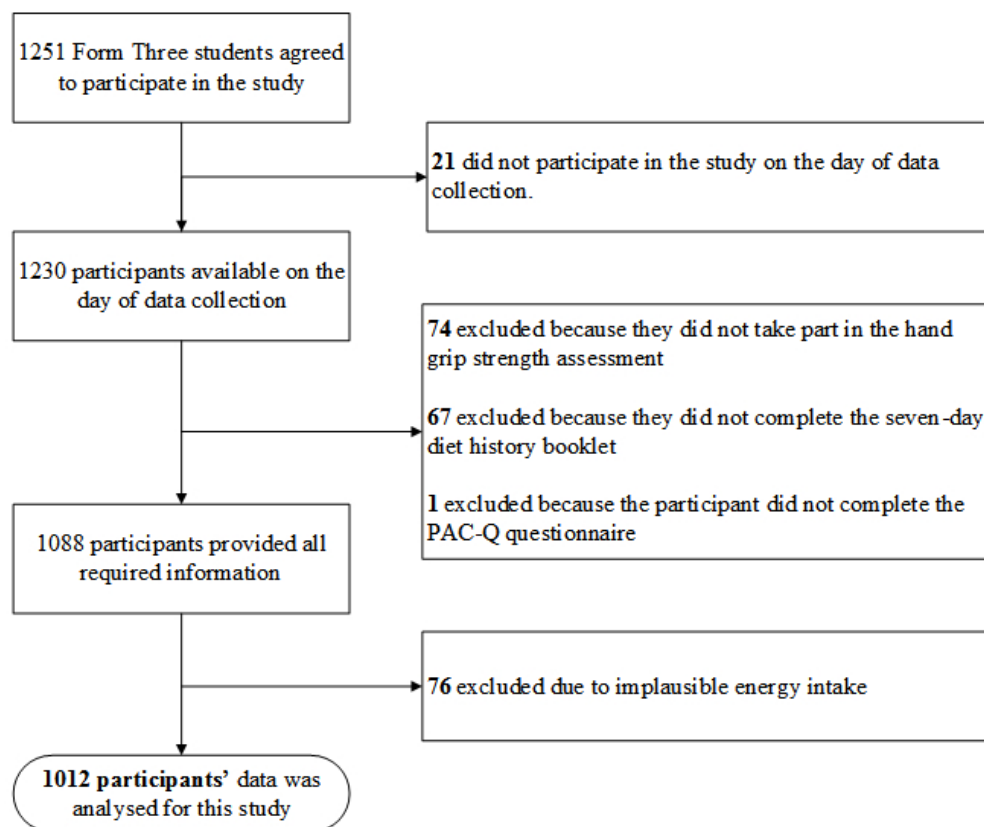

Flowchart of the participant sampling procedure

173x143mm (96 x 96 DPI)



**STROBE 2007 (v4) checklist of items to be included in reports of observational studies in epidemiology\***  
**Checklist for cohort, case-control, and cross-sectional studies (combined)**

| Section/Topic             | Item # | Recommendation                                                                                                                                                                                                                                                                                                                                                                                                                                                         | Reported on page # |
|---------------------------|--------|------------------------------------------------------------------------------------------------------------------------------------------------------------------------------------------------------------------------------------------------------------------------------------------------------------------------------------------------------------------------------------------------------------------------------------------------------------------------|--------------------|
| Title and abstract        | 1      | (a) Indicate the study’s design with a commonly used term in the title or the abstract                                                                                                                                                                                                                                                                                                                                                                                 | 1                  |
|                           |        | (b) Provide in the abstract an informative and balanced summary of what was done and what was found                                                                                                                                                                                                                                                                                                                                                                    | 1                  |
| <b>Introduction</b>       |        |                                                                                                                                                                                                                                                                                                                                                                                                                                                                        |                    |
| Background/rationale      | 2      | Explain the scientific background and rationale for the investigation being reported                                                                                                                                                                                                                                                                                                                                                                                   | 3                  |
| Objectives                | 3      | State specific objectives, including any pre-specified hypotheses                                                                                                                                                                                                                                                                                                                                                                                                      | 3                  |
| <b>Methods</b>            |        |                                                                                                                                                                                                                                                                                                                                                                                                                                                                        |                    |
| Study design              | 4      | Present key elements of study design early in the paper                                                                                                                                                                                                                                                                                                                                                                                                                | 4                  |
| Setting                   | 5      | Describe the setting, locations, and relevant dates, including periods of recruitment, exposure, follow-up, and data collection                                                                                                                                                                                                                                                                                                                                        | 4                  |
| Participants              | 6      | (a) <i>Cohort study</i> —Give the eligibility criteria, and the sources and methods of selection of participants. Describe methods of follow-up<br><i>Case-control study</i> —Give the eligibility criteria, and the sources and methods of case ascertainment and control selection. Give the rationale for the choice of cases and controls<br><i>Cross-sectional study</i> —Give the eligibility criteria, and the sources and methods of selection of participants | 4                  |
|                           |        | (b) <i>Cohort study</i> —For matched studies, give matching criteria and number of exposed and unexposed<br><i>Case-control study</i> —For matched studies, give matching criteria and the number of controls per case                                                                                                                                                                                                                                                 | Not applicable     |
| Variables                 | 7      | Clearly define all outcomes, exposures, predictors, potential confounders, and effect modifiers. Give diagnostic criteria, if applicable                                                                                                                                                                                                                                                                                                                               | 4-5                |
| Data sources/ measurement | 8*     | For each variable of interest, give sources of data and details of methods of assessment (measurement). Describe comparability of assessment methods if there is more than one group                                                                                                                                                                                                                                                                                   | 4-5                |
| Bias                      | 9      | Describe any efforts to address potential sources of bias                                                                                                                                                                                                                                                                                                                                                                                                              | Not applicable     |
| Study size                | 10     | Explain how the study size was arrived at                                                                                                                                                                                                                                                                                                                                                                                                                              | 4                  |
| Quantitative variables    | 11     | Explain how quantitative variables were handled in the analyses. If applicable, describe which groupings were chosen and why                                                                                                                                                                                                                                                                                                                                           | 6                  |
| Statistical methods       | 12     | (a) Describe all statistical methods, including those used to control for confounding                                                                                                                                                                                                                                                                                                                                                                                  | 6                  |
|                           |        | (b) Describe any methods used to examine subgroups and interactions                                                                                                                                                                                                                                                                                                                                                                                                    | 6                  |
|                           |        | (c) Explain how missing data were addressed                                                                                                                                                                                                                                                                                                                                                                                                                            | Not applicable     |
|                           |        | (d) <i>Cohort study</i> —If applicable, explain how loss to follow-up was addressed<br><i>Case-control study</i> —If applicable, explain how matching of cases and controls was addressed                                                                                                                                                                                                                                                                              | Not applicable     |

|                          |     |                                                                                                                                                                                                              |                |
|--------------------------|-----|--------------------------------------------------------------------------------------------------------------------------------------------------------------------------------------------------------------|----------------|
|                          |     | <i>Cross-sectional study</i> —If applicable, describe analytical methods taking account of sampling strategy                                                                                                 |                |
|                          |     | (e) Describe any sensitivity analyses                                                                                                                                                                        | Not applicable |
| <b>Results</b>           |     |                                                                                                                                                                                                              |                |
| Participants             | 13* | (a) Report numbers of individuals at each stage of study—eg numbers potentially eligible, examined for eligibility, confirmed eligible, included in the study, completing follow-up, and analysed            | 6              |
|                          |     | (b) Give reasons for non-participation at each stage                                                                                                                                                         | 6              |
|                          |     | (c) Consider use of a flow diagram                                                                                                                                                                           | Not applicable |
| Descriptive data         | 14* | (a) Give characteristics of study participants (eg demographic, clinical, social) and information on exposures and potential confounders                                                                     | 6, 8-9         |
|                          |     | (b) Indicate number of participants with missing data for each variable of interest                                                                                                                          | 6              |
|                          |     | (c) <i>Cohort study</i> —Summarise follow-up time (eg, average and total amount)                                                                                                                             | Not applicable |
| Outcome data             | 15* | <i>Cohort study</i> —Report numbers of outcome events or summary measures over time                                                                                                                          | Not applicable |
|                          |     | <i>Case-control study</i> —Report numbers in each exposure category, or summary measures of exposure                                                                                                         | Not applicable |
|                          |     | <i>Cross-sectional study</i> —Report numbers of outcome events or summary measures                                                                                                                           | Not applicable |
| Main results             | 16  | (a) Give unadjusted estimates and, if applicable, confounder-adjusted estimates and their precision (eg, 95% confidence interval). Make clear which confounders were adjusted for and why they were included | 6-7, 10        |
|                          |     | (b) Report category boundaries when continuous variables were categorized                                                                                                                                    | Not applicable |
|                          |     | (c) If relevant, consider translating estimates of relative risk into absolute risk for a meaningful time period                                                                                             | Not applicable |
| Other analyses           | 17  | Report other analyses done—eg analyses of subgroups and interactions, and sensitivity analyses                                                                                                               | Not applicable |
| <b>Discussion</b>        |     |                                                                                                                                                                                                              |                |
| Key results              | 18  | Summarise key results with reference to study objectives                                                                                                                                                     | 11-13          |
| Limitations              | 19  | Discuss limitations of the study, taking into account sources of potential bias or imprecision. Discuss both direction and magnitude of any potential bias                                                   | 13             |
| Interpretation           | 20  | Give a cautious overall interpretation of results considering objectives, limitations, multiplicity of analyses, results from similar studies, and other relevant evidence                                   | 13             |
| Generalisability         | 21  | Discuss the generalisability (external validity) of the study results                                                                                                                                        | 13             |
| <b>Other information</b> |     |                                                                                                                                                                                                              |                |
| Funding                  | 22  | Give the source of funding and the role of the funders for the present study and, if applicable, for the original study on which the present article is based                                                | 14             |

\*Give information separately for cases and controls in case-control studies and, if applicable, for exposed and unexposed groups in cohort and cross-sectional studies.

**Note:** An Explanation and Elaboration article discusses each checklist item and gives methodological background and published examples of transparent reporting. The STROBE checklist is best used in conjunction with this article (freely available on the Web sites of PLoS Medicine at <http://www.plosmedicine.org/>, Annals of Internal Medicine at <http://www.annals.org/>, and Epidemiology at <http://www.epidem.com/>). Information on the STROBE Initiative is available at [www.strobe-statement.org](http://www.strobe-statement.org).

# BMJ Open

## Dietary intake, physical activity and muscle strength among adolescents: the Malaysian Health and Adolescents Longitudinal Research Team (MyHeART) study

|                                 |                                                                                                                                                                                                                                                                                                                                                                                                                                                                                                                                                                                                                                                   |
|---------------------------------|---------------------------------------------------------------------------------------------------------------------------------------------------------------------------------------------------------------------------------------------------------------------------------------------------------------------------------------------------------------------------------------------------------------------------------------------------------------------------------------------------------------------------------------------------------------------------------------------------------------------------------------------------|
| Journal:                        | <i>BMJ Open</i>                                                                                                                                                                                                                                                                                                                                                                                                                                                                                                                                                                                                                                   |
| Manuscript ID                   | bmjopen-2018-026275.R2                                                                                                                                                                                                                                                                                                                                                                                                                                                                                                                                                                                                                            |
| Article Type:                   | Research                                                                                                                                                                                                                                                                                                                                                                                                                                                                                                                                                                                                                                          |
| Date Submitted by the Author:   | 17-Apr-2019                                                                                                                                                                                                                                                                                                                                                                                                                                                                                                                                                                                                                                       |
| Complete List of Authors:       | Ng, Ai Kah; University of Malaya, Faculty of Medicine, Department of Social and Preventive Medicine; International Medical University, School of Health Sciences, Nutrition and Dietetics Department<br>Hairi, Noran; University of Malaya, Faculty of Medicine, Centre for Epidemiology & Evidence-Based Practice and Department of Social and Preventive Medicine<br>Jalaludin, Muhammad Yazid; University of Malaya, Faculty of Medicine, Department of Paediatrics<br>Majid, Hazreen; University of Malaya, Faculty of Medicine, Department of Social and Preventive Medicine; Harvard University T H Chan School of Public Health, Nutrition |
| <b>Primary Subject Heading</b>: | Public health                                                                                                                                                                                                                                                                                                                                                                                                                                                                                                                                                                                                                                     |
| Secondary Subject Heading:      | Paediatrics, Nutrition and metabolism                                                                                                                                                                                                                                                                                                                                                                                                                                                                                                                                                                                                             |
| Keywords:                       | Hand grip strength, Dietary intake, Adolescents, Physical activity, muscle strength                                                                                                                                                                                                                                                                                                                                                                                                                                                                                                                                                               |
|                                 |                                                                                                                                                                                                                                                                                                                                                                                                                                                                                                                                                                                                                                                   |

SCHOLARONE™  
Manuscripts

1  
2  
3 *Research article*  
4  
5

6 **Dietary intake, physical activity and muscle strength among adolescents: the Malaysian**  
7  
8 **Health and Adolescents Longitudinal Research Team (MyHeART) study**  
9

10  
11  
12  
13  
14 AK Ng<sup>1</sup>, NN Hairi<sup>3</sup>, MY Jalaludin<sup>4</sup>, HA Majid<sup>1,2</sup>  
15  
16

17  
18  
19  
20 <sup>1</sup> Department of Social and Preventive Medicine, Faculty of Medicine, University Malaya, 50603  
21  
22 Kuala Lumpur, Malaysia.  
23

24  
25 <sup>2</sup> Department of Nutrition, Harvard Chan School of Public Health, 677 Huntington Avenue, Boston  
26  
27 MA 02115  
28

29  
30 <sup>3</sup> Centre for Epidemiology & Evidence-Based Practice, Department of Social and Preventive  
31  
32 Medicine, Faculty of Medicine, University Malaya, 50603 Kuala Lumpur, Malaysia.  
33  
34

35  
36 <sup>4</sup> Department of Paediatrics, Faculty of Medicine, University Malaya, 50603 Kuala Lumpur,  
37  
38 Malaysia.  
39  
40  
41  
42  
43  
44  
45  
46  
47  
48  
49  
50  
51  
52  
53  
54  
55  
56  
57  
58  
59  
60

1  
2  
3 **Contact number, email addresses and postal addresses for each author:**  
4  
5

6 Noran Naqiah Hairi:

7  
8  
9 Contact no: +603-79674762  
10

11  
12 Email address: [noran@ummc.edu.my](mailto:noran@ummc.edu.my)  
13

14  
15 Postal address: Department of Social and Preventive Medicine, Faculty of Medicine,  
16  
17 University of Malaya, 50603 Kuala Lumpur, Malaysia  
18  
19

20  
21  
22  
23 Muhammad Yazid Jalaludin:

24  
25  
26 Contact no: +603-79492417  
27

28  
29 Email address: [yazidj@ummc.edu.my](mailto:yazidj@ummc.edu.my)  
30

31  
32 Postal address: Department of Paediatrics, Faculty of Medicine, University of Malaya,  
33  
34 50603 Kuala Lumpur, Malaysia  
35  
36

37  
38  
39  
40 Ng Ai Kah:

41  
42  
43 Phd Candidate  
44

45  
46 Contact no: +6017-3846869  
47

48  
49 Email address: [ngaikah@siswa.um.edu.my](mailto:ngaikah@siswa.um.edu.my)  
50

51  
52 Postal address: Department of Social and Preventive Medicine, Faculty of Medicine,  
53  
54 University of Malaya, 50603 Kuala Lumpur, Malaysia  
55  
56

1  
2  
3 **Corresponding author:**  
4

5  
6 Majid HA, Associate Professor, PhD, RD, Faculty of Medicine, Department of Social and  
7 Preventive Medicine, University of Malaya, Kuala Lumpur, Malaysia  
8  
9

10  
11 E-mail: [hazreen@ummc.edu.my](mailto:hazreen@ummc.edu.my)  
12

13  
14 [hazreen.abdulmajid@gmail.com](mailto:hazreen.abdulmajid@gmail.com)  
15  
16  
17  
18  
19

20 **Word Count**, excluding title page, abstract, references, figures and tables: 4000 words.  
21  
22  
23  
24  
25

26 **Tables:** 3  
27  
28  
29  
30  
31

32 **Figure:** 1  
33  
34  
35  
36  
37

38 **Funding Statement:** This study was supported by funding received from the University Malaya's  
39 Research Programme (UMRP022A-14HTM) and Postgraduate Research Fund (PG026-2016A).  
40  
41  
42  
43  
44  
45

46 **Funding**  
47  
48

49 University of Malaya Research Grant (UMRP022A-14HTM), UMSC grant cycle 1-2016 and all  
50 the school children who participated in this study. The funding bodies did not contribute to the  
51 design of the study, data collection, analysis, or interpretation of data.  
52  
53  
54  
55  
56  
57  
58  
59  
60

1  
2  
3 **Disclosure:** The authors declare that they have no conflict of interests.  
4  
5

6 **Author Contributions/ Statement of authorship:** AK Ng, HA Majid and NN Hairi carried out  
7  
8 the data analysis. AK Ng drafted the manuscript. HA Majid and NN Hairi contributed in the design  
9  
10 of the study. HA Majid and MY Jalaludin involved with the data collection. All authors contributed  
11  
12 to the final manuscript write up.  
13  
14

### 15 16 17 18 **Ethics approval and consent to participate**

19  
20 Ethical approval was obtained from the Medical Ethics Committee, University Malaya Medical  
21  
22 Centre (MEC Ref. No: 896.34). The National Medical Research Register number is 14-376-20486.  
23  
24 Participation in the study was voluntary and written informed consent and ascent for participation  
25  
26 in the study was obtained from the parents or guardian as well as the participants.  
27  
28  
29  
30  
31  
32  
33  
34  
35  
36  
37  
38  
39  
40  
41  
42  
43  
44  
45  
46  
47  
48  
49  
50  
51  
52  
53  
54  
55  
56  
57  
58  
59  
60



1  
2  
3  
4  
5 **Title: Dietary intake, physical activity and muscle strength among adolescents: the**  
6 **Malaysian Health and Adolescents Longitudinal Research Team (MyHeART) study**  
7  
8  
9

10 **ABSTRACT**  
11

12 **Objective:** To examine the role of dietary intake and physical activity in muscle strength among  
13 adolescents.  
14

15 **Design:** Cross-sectional analysis.  
16

17 **Setting:** The Malaysian Health and Adolescents Longitudinal Research Team (MyHeART) study.  
18

19 **Participants:** Fifteen-year-old secondary school children who have given consent and who  
20 participated in the MyHeART study in 2014.  
21

22 **Primary outcome measure:** Muscle strength was measured in relation to dietary intake (energy  
23 and macronutrients) and physical activity by using a hand grip dynamometer.  
24

25 **Results:** Among the 1012 participants (395 male; 617 female), the hand grip strength of the males  
26 was higher than that of the females (27.08 kg vs 18.63 kg;  $p<0.001$ ). Also, males were more active  
27 (2.43 vs 2.12;  $p<0.001$ ) and consumed a higher amount energy (2047 kcal vs 1738 kcal,  $p<0.001$ ),  
28 carbohydrate (280.71 g vs 229.31 g;  $p<0.001$ ) and protein (1.46g/kgBW vs 1.35g/kgBW;  
29  $p<0.168$ ). After controlling for ethnicity, place of residency and body mass index (BMI), there was  
30 a positive relationship between hand grip strength and the intake of energy ( $r=0.14$ ;  $p=0.006$ ),  
31 carbohydrate ( $r=0.153$ ;  $p=0.002$ ) and fat ( $r=0.124$ ;  $p=0.014$ ) and the physical activity score  
32 ( $r=0.170$ ;  $p=0.001$ ) and a negative relationship between hand grip strength and the intake of  
33 protein ( $r=-0.134$ ;  $p=0.008$ ), for males. However, this was not observed among females.  
34  
35  
36

37 **Conclusions:** Energy, carbohydrate and fat intakes and physical activity score were positively  
38 correlated with hand grip strength while protein intake was negatively correlated with hand grip  
39 strength in males but not in females.  
40  
41  
42

43 **Keywords:** Muscle strength, Hand grip strength, Dietary intake, Physical activity, Adolescents  
44  
45  
46  
47  
48  
49  
50  
51  
52  
53  
54  
55  
56  
57  
58  
59  
60

## ARTICLE SUMMARY

### Strengths and limitations of this study

- The main strengths of this study are that it used a large sample of adolescents and the standardised measurement of muscle strength.
- This study is also the first to investigate the association between dietary intake, physical activity and muscle strength among adolescents in Asia.
- The main limitations of this study are that the sample covers a limited age range and the cross-sectional design of the study does not allow any causality interpretations.

For peer review only

## INTRODUCTION

Recent research has paid much attention to poor muscles strength among adolescents and its association with adverse health-related outcomes, including cardiovascular disease,<sup>1</sup> poorer metabolic profile,<sup>2-4</sup> obesity<sup>5 6</sup> and musculoskeletal pain<sup>7</sup> as well as premature death from any cause.<sup>1</sup> Furthermore, a cross-sectional study among adolescents in a city in southern Brazil reported a prevalence of low muscle strength of 47% among the study population.<sup>8</sup> Moreover, most studies have suggested that there is a declining trend of muscle strength among adolescents over time<sup>9-12</sup> except for a study conducted in Colombia<sup>13</sup> that indicated otherwise. The study in Colombia, a middle-income country, also found that, adolescents have a lower hand grip strength compared to those in high-income countries.<sup>13</sup> Similarly, a preliminary finding from the MyHeART study showed that Malaysian adolescents have a lower handgrip strength than those in other countries.<sup>9 14 15</sup> However, it was not possible to categorise the hand grip strength of Malaysian adolescents based on the cutoff values used<sup>8</sup> as there were no available normal values for Asian adolescents. Moreover, the published cutoff values should not be used as the reference standard for Asian populations because most Asians are not able to achieve the published cutoff values.<sup>16</sup>

Issues pertaining to unhealthy dietary intake<sup>17</sup> and low physical activity<sup>18</sup> among adolescents are well documented worldwide. In fact, dietary intake and/or low physical activity are increasingly recognised to be modifiable health-related behavioural determinants of muscle strength among adolescents.<sup>15 19-21</sup> the results reported by population-based cohort studies regarding the effect of energy and macronutrient intake are limited at this point in time.<sup>15 22</sup> For instance, a cross-sectional study that was conducted among European adolescents found that specific amino acids are associated with muscle strength; however, when carbohydrate is controlled for, these relationships disappear.<sup>15</sup> Another cohort study from India in which pregnant women and children were given a balanced protein-calorie supplementation and the children were followed up at adult stage, also emphasised the importance of an adequate energy intake in order to increase muscle strength. The cohort study also found that energy intake and physical activity are positively associated with muscle strength.<sup>22</sup> Furthermore, an experimental study on adolescents found that milk supplementation with resistance training does not change body composition.<sup>23</sup> However, the authors argued that it could be due to energy intake playing a vital role in the relationship between body composition, resistance training and the effect of these factors on both muscle mass and strength.<sup>23</sup>

In view of the changes that take place in the skeletal muscle in response to energy and macronutrient intake particularly carbohydrate and protein intake, in normal physiology<sup>24</sup>, it is worthwhile to further investigate the relationship between dietary intake, particularly energy and macronutrients, and muscle strength. While previous studies have provided some evidences to demonstrate that low level of physical activity<sup>8 25</sup> and being overweight<sup>8</sup> are associated with low hand grip strength, there was only a study by Gracia-Marco et al (2017) has evaluated the effect of amino acids (dietary protein) and physical activity on hand grip strength.<sup>15</sup> It seems that no study have evaluated the influence of dietary intake and physical activity on hand grip strength among adolescents specifically. Thus, the relationship between dietary intake, physical activity and muscle strength among adolescents is not yet well understood. Moreover, to the best of the

1  
2  
3 authors' knowledge, only a limited number of studies have investigated the association between  
4 hand grip strength, dietary intake and/or physical activity among adolescents, particularly in Asia.  
5 Therefore, the purpose of this paper is to examine the association between hand grip strength,  
6 dietary intake and physical activity among adolescents in Malaysia.  
7  
8  
9

## 10 **METHODS**

11  
12 This cross-sectional study is a secondary analysis of data derived from the first follow-up of the  
13 Malaysian Health and Adolescents Longitudinal Research Team (MyHeART) study. The  
14 population for the current study was comprised of 15-year-old adolescents attending public  
15 secondary schools in the central and northern regions of Peninsular Malaysia. The sampling  
16 method used was multistage random sampling. The primary sampling units were the schools and  
17 the secondary sampling units were the students. In the first stage, the study frame was a complete  
18 list of public schools in the two above-mentioned regions from which total of 15 public secondary  
19 schools were selected. In the second stage, the defined study population was selected from a  
20 complete list of Form Three students in each of the selected school. Full details of the original  
21 MyHeART study protocol have been published elsewhere.<sup>26</sup>  
22  
23  
24  
25  
26  
27

28 In 2014, 1230 adolescents were recruited for the MyHeART study. Out of the total participants in  
29 2014, 1012 (82.3%) were included in the analysis for this paper. A flowchart of the sampling  
30 procedure used to select the participants for this study is provided in Figure 1.  
31  
32  
33

34 The MyHeART study was approved by the Ethics Committee of the University Malaya Medical  
35 Centre (MEC Ref. No. 896.34). Subsequently, formal approval was obtained from the Ministry of  
36 Health and Ministry of Education and then approval was sought from the relevant state level  
37 administrative authorities before approaching the Headmasters and Headmistresses of the selected  
38 schools.  
39  
40  
41  
42

43 The data collection was conducted by the MyHeART team, which was led by the principal  
44 investigator. The team consisted of 20 research assistants (medical doctors, nurses and dietitians)  
45 who collected the data at various stations such as anthropometry, hand grip strength and dietary  
46 stations. The data was collected between March and May in 2014. Prior to conducting data  
47 collection, Principle Investigator provided orientation and training sessions for the research  
48 assistants in order to familiarise them with the objectives and methodology of the study as well as  
49 hands-on practice in measuring the anthropometrics and hand grip strength. In addition, the  
50 researcher assistants who were dietitians received training on how to conduct the seven-days diet  
51 history using standardised portion of food and how to translate the diet history into a coding sheet  
52 in order to ensure the consistency and quality of the collected data.  
53  
54  
55  
56  
57  
58  
59  
60

## Muscle strength

Hand grip strength has been shown to have moderate to strong validity and high reliability in tests for upper body and lower body strength in adolescents.<sup>27</sup> Moreover, hand grip strength has been found to be valid, reliable and feasible for school setting.<sup>28</sup> Therefore muscle strength was assessed by using hand grip strength. A calibrated hand dynamometer (Jamar, Sammons Preston Rolyan, Illinois, US), whose unit of measurement is the kilogram, was used in the assessment of hand grip strength. The strength of the dominant and the non-dominant hand was recorded. Prior to the measurements being taken, the dynamometer was calibrated. Then, it was adjusted for different hand sizes. Participants were gathered in a hall. Each participant was positioned in a straight back chair with both feet flat on the ground. The elbow was flexed to 90° with forearm and wrist were in neutral position. The measurement began with dominant hand once the dominant hand was identified. The measurement followed by the non-dominant hand. The dominant and non-dominant hands of the participants were each tested three times and the readings were recorded to the nearest 0.1 kg.<sup>29</sup> The average of the three readings for the dominant hand was used in analysis. All the measurements were done by trained research assistants.

## Dietary intakes

Dietary intake was assessed by using a 7-day diet history. The diet history is the best method by which to estimate adolescents' intakes because they can better recall what they have eaten and drunk and this history can thus reveal more accurate information about their overall intakes.<sup>30</sup> This method also shows less variation in dietary assessment from the epidemiological perspective<sup>31</sup> and is more representative of adolescents' habitual intakes than other methods.<sup>32,33</sup> The seven-day diet history was collected by trained research assistants who were qualified dietitians. The *Nutrient Composition of Malaysian Food* (4th edition)<sup>34</sup> was used to calculate energy and macronutrient intakes and the values were entered into the Nutritionist Pro™ database (Axxya Systems, USA).<sup>34</sup> The intakes from food items and recipes that could not be found in the *Nutrient Composition of Malaysian Food* were calculated on the basis of the details provided by the food packaging and the recipe. These calculations were then entered into the database by adjusting them based on standard recipes (per serving size). After the diet history had been analysed, 10% of the data was randomly cross-checked by an independent qualified dietitian who was not involved in analysing the dietary data. The margin of error was 4.4%. It was seemed acceptable as it has been stated that a 10% margin of error is acceptable.<sup>35</sup> Total of 76 participants with implausible energy intakes (<500 kcal/day or >5000 kcal/day) were excluded from this analysis.<sup>36</sup>

## Physical activity score

A Malay version of the validated physical activity questionnaire for older children (PAQ-C) consisting of 10 items was used to obtain the physical activity level of the adolescents over the past 7 days. The PAC-Q questionnaire has been shown to be valid and to have good internal consistency.<sup>37-39</sup> The translated version has been validated in a local setting.<sup>40</sup> The first item in the

questionnaire was used to assess the type and frequency of sports and/or dance activities in which the adolescents took part. The second to eighth were used to assess the activity of the adolescents during physical education classes, recess, lunchtime, immediately after school, in the evenings, at the weekend and during leisure time. A five-point Likert scale 1 [lowest] to 5 [highest] was used for the second to eighth items. The ninth item was used to assess their physical activity frequency. The tenth item was used to gather information on any unusual activities that the adolescents undertook during those 7 days. The results obtained from the PAQ-C were categorised following Crocker et al (1997) into low (<2.33), moderate (2.33-3.66) and high (>3.66).<sup>41</sup>

### **Anthropometric measures**

Body weight was measured by using a digital electronic weighing scale (Seca 813, Seca, UK) and recorded to the nearest 0.1 kg. Height was measured without socks and shoes by using a calibrated vertical stadiometer (Seca Portable 217, Seca, UK) and recorded to the nearest 0.1 cm. Body mass index was calculated as weight in kilograms divided by the square of height in metres. Waist circumference (midpoint between the lowest rib margin and the iliac crest) was measured by using a non-elastic measuring tape (Seca 201, Seca, UK) and recorded to the nearest 0.1 cm. Percentage body fat was measured by using a bioelectric impedance analyser (SC-240, Body Composition Analyser, Tanita Europe BV, The Netherlands).

### **Sociodemographic measures**

Sociodemographic measures were collected via parental and student questionnaires which included questions on age, ethnicity and place of residency.

### **Statistical analyses**

Analyses were performed using the Statistical Package for Social Sciences software for Windows version 22.0 (IBM, Chicago, IL, USA) and the significance level was set at  $p < 0.05$ . The analyses were performed separately by gender. Normality and skewness tests were used to assess normal distribution. All variables showed a normal distribution, except for weight, waist circumference and BMI. Data was presented as means and standard deviations for normally distributed continuous variables, medians and interquartile ranges (IQRs) for non-normally distributed continuous variables and percentages for categorical variables. The independent t-test was used to examine gender differences for normally distributed variables and the Mann-Whitney U test was used for non-normally distributed variables. The association between hand grip strength and (i) energy intake, (ii) macronutrient intake and (iii) physical activity score was assessed by using Pearson's correlation coefficient. The hand grip strength of the dominant hand was entered as the dependent variable and (i) energy and macronutrient intake and (ii) physical activity score were entered as the independent variables while controlling for ethnicity, place of residency and BMI. Body mass index was chosen as the covariate despite there being several other indicators of obesity



1  
2  
3 because BMI is able to discriminate body fatness in adolescents.<sup>42</sup> In addition, linear regression  
4 was used to investigate whether dietary intake and physical activity could predict hand grip  
5 strength when controlling for ethnicity, place of residency and BMI.  
6  
7  
8

### 9 **Patient and public involvement**

10  
11 An information sheet and consent forms were given to the students and their parents/guardian prior  
12 to recruitment. Participation in the study was on a voluntary basis. A feasibility study was done  
13 prior to the actual study and its findings assisted in ensuring the flow of the actual study and data  
14 collection. Each participant was given a record book in which the relevant results such as weight,  
15 height and hand grip strength were recorded.  
16  
17  
18

## 19 **RESULTS**

### 20 **Descriptive analysis**

21  
22 Table 1 provides the characteristics of the participants. It can be seen that males had significantly  
23 higher values than females in terms of weight, physical activity score, hand grip strength of both  
24 hands, and energy and carbohydrate intakes per day, but not in percentage body fat and BMI  
25 ( $p < 0.05$ ). About two thirds (69.2%) of the females had a low physical activity score, whereas  
26 almost two thirds of the males (65.2%) had a moderate to high physical activity score.  
27  
28  
29  
30  
31

### 32 **Correlation and regression**

33  
34 Table 2 illustrates the main result and the number of participants used for the analysis which was  
35 as described in Figure 1. A positive linear relationship was found between energy, carbohydrate,  
36 and fat intakes and physical activity score and the dependent variable hand grip strength ( $p < 0.01$ )  
37 among males. Meanwhile, protein (g/kg body weight) was found to be negatively correlated with  
38 hand grip strength among males ( $p < 0.01$ ). However, no such correlation was found in females.  
39  
40  
41  
42

43  
44 To investigate whether dietary intake and physical activity could predict hand grip strength, a  
45 linear regression was computed while controlling for ethnicity, place of residency and BMI. Before  
46 running the regressions, the assumptions of linearity, normally distributed errors and non-  
47 correlated errors were checked and met. Protein, carbohydrate and fat intakes were not used in the  
48 regression due to multicollinearity. When the physical activity score and energy intake were added,  
49 both variables significantly predicted hand grip strength:  $F(3, 391) = 26.318$ ,  $p < 0.001$ , adjusted  
50  $R^2 = 0.162$  (Table 3). When physical factors (length of dominant hand span and height) were  
51 entered, the prediction improved with an adjusted  $R^2$  of 0.339.  
52  
53  
54  
55  
56  
57  
58  
59  
60



**Table 1: Characteristics of MyHeART participants**

|                                             | <b>Male</b>    | <b>Female</b>  | <b>All</b>      | <b><i>p</i></b> |
|---------------------------------------------|----------------|----------------|-----------------|-----------------|
|                                             | <b>(n=395)</b> | <b>(n=617)</b> | <b>(n=1012)</b> |                 |
| <b>Age (y)</b>                              | 15.04 (±0.198) | 15.04 (±0.205) | 15.04 (±0.202)  | 0.384           |
| <b>Ethnicity</b>                            |                |                |                 |                 |
| Malay                                       | 307 (77.7%)    | 487 (78.9%)    | 795 (78.6%)     | 0.495           |
| Chinese                                     | 26 (6.6%)      | 47 (7.6%)      | 73 (7.2%)       |                 |
| Indian                                      | 35 (8.9%)      | 54 (8.8%)      | 89 (8.8%)       |                 |
| Others                                      | 27 (6.8%)      | 29 (4.7%)      | 56 (5.5%)       |                 |
| <b>Place of residency</b>                   |                |                |                 |                 |
| Urban                                       | 216 (54.7%)    | 367 (59.5%)    | 583 (57.6%)     | 0.132           |
| Rural                                       | 179 (45.3%)    | 250 (40.5%)    | 429 (42.4%)     |                 |
| <b>Weight<sup>a</sup> (kg)</b>              | 51.00 (17.00)  | 48.50 (15.35)  | 49.50 (15.60)   | <0.001*         |
| <b>Height (cm)</b>                          | 163.20 (±6.76) | 154.65 (±5.67) | 157.99 (±7.40)  | 0.052           |
| <b>BMI<sup>a</sup> (kg/m<sup>2</sup>)</b>   | 18.90 (5.49)   | 20.25 (5.74)   | 19.74 (5.73)    | <0.001*         |
| <b>BMI category</b>                         |                |                |                 | <0.001*         |
| <b>Underweight</b>                          | 86 (21.8%)     | 108 (17.5%)    | 194 (19.2%)     |                 |
| <b>Normal</b>                               | 222 (56.2%)    | 355 (57.5%)    | 577 (57.0%)     |                 |
| <b>Overweight</b>                           | 51 (12.9%)     | 101 (16.4%)    | 152 (15.0%)     |                 |
| <b>Obesity</b>                              | 36 (9.1%)      | 53 (8.6%)      | 89 (8.8%)       |                 |
| <b>% body fat</b>                           | 15.50 (±11.02) | 29.37 (±9.17)  | 23.95 (±12.01)  | <0.001*         |
| <b>Waist circumference<sup>a</sup> (cm)</b> | 67.90 (15.50)  | 69.00 (13.50)  | 68.50 (14.00)   | 0.514           |

Differences between male and female participants were determined using an independent *t*-test and the Mann-Whitney test. Data are presented as means ± standard deviation or as n (%), unless otherwise stated.

\*Statistically significant at  $p < 0.05$ .

<sup>a</sup>Values are expressed as medians (IQRs).

**Table 1: Characteristics of MyHeART participants (cont...)**

|                                                        | <b>Male</b><br><b>(n=395)</b> | <b>Female</b><br><b>(n=617)</b> | <b>All</b><br><b>(n=1012)</b> | <b>p</b> |
|--------------------------------------------------------|-------------------------------|---------------------------------|-------------------------------|----------|
| <b>Physical activity score</b>                         | 2.43 (±0.75)                  | 2.12 (±0.54)                    | 2.24 (±0.65)                  | <0.001*  |
| <b>Physical activity level</b>                         |                               |                                 |                               |          |
| low (<2.33)                                            | 177 (44.8%)                   | 427 (69.2%)                     | 604 (59.7%)                   | <0.001*  |
| moderate (2.33-3.66)                                   | 199 (50.4%)                   | 183 (29.7%)                     | 382 (37.7%)                   |          |
| high (>3.66)                                           | 19 (4.8%)                     | 7 (1.1%)                        | 26 (2.6%)                     |          |
| <b>Hand grip strength (kg)</b>                         |                               |                                 |                               |          |
| Average hand grip strength<br>(dominant hand) (kg)     | 27.25 (±7.16)                 | 18.73 (±4.63)                   | 22.06 (±7.09)                 | <0.001*  |
| Average hand grip strength<br>(non-dominant hand) (kg) | 25.77 (±7.34)                 | 17.44 (±4.72)                   | 20.69 (±7.15)                 | <0.001*  |
| <b>Energy &amp; macronutrients<br/>intake</b>          |                               |                                 |                               |          |
| Energy (kcal)                                          | 2047 (±583)                   | 1738 (±474)                     | 1858 (±540)                   | 0.001*   |
| Protein (g)                                            | 75.69 (±22.48)                | 66.07 (±19.45)                  | 69.82 (±21.20)                | 0.04*    |
| Protein (g/kg)                                         | 1.46 (±0.58)                  | 1.35 (±0.53)                    | 1.40 (±0.55)                  | 0.168    |
| Carbohydrate (g)                                       | 280.71 (±90.17)               | 229.31 (±67.79)                 | 249.37 (±81.23)               | <0.001*  |
| Fat (g)                                                | 68.97 (±21.74)                | 61.60 (±20.13)                  | 64.48 (±21.07)                | 0.16     |

*Differences between male and female participants were determined using an independent t-test and the Mann-Whitney test. Data are presented as means ± standard deviation or as n (%), unless otherwise stated.*

*\*Statistically significant at p<0.05.*

*<sup>a</sup>Values are expressed as medians (IQRs).*

**Table 2: Partial correlation (r) between dietary intake, physical activity score and hand grip strength in adolescents**

|                                         | Hand grip strength for males*<br>(n = 395) |         | Hand grip strength for females*<br>(n = 617) |       |
|-----------------------------------------|--------------------------------------------|---------|----------------------------------------------|-------|
|                                         | r                                          | P       | r                                            | p     |
| <b>Energy and macronutrients intake</b> |                                            |         |                                              |       |
| <b>Energy (kcal)</b>                    | 0.140                                      | 0.006** | 0.018                                        | 0.651 |
| <b>Protein (g/kg)</b>                   | -0.134                                     | 0.008** | -0.021                                       | 0.610 |
| <b>Carbohydrate (g)</b>                 | 0.153                                      | 0.002** | 0.026                                        | 0.528 |
| <b>Fat (g)</b>                          | 0.124                                      | 0.014** | -0.002                                       | 0.962 |
| <b>Physical activity score</b>          | 0.170                                      | 0.001** | 0.042                                        | 0.298 |

\*Controlled for ethnicity, place of residency and BMI

\*\*Statistically significant at  $p < 0.05$ .

**Table 3: Multiple linear regression model for male adolescents**

|                                | Hand grip strength of male<br>(n = 395) |         |        |
|--------------------------------|-----------------------------------------|---------|--------|
|                                | R <sup>2</sup>                          | $\beta$ | p      |
| <b>Energy intake (kcal)</b>    | 0.162                                   | 0.143   | 0.002* |
| <b>Physical activity score</b> |                                         | 0.129   | 0.006* |

\*Controlled for ethnicity, place of residency and BMI

## DISCUSSION

### Hand grip strength, dietary intake and physical activity

This study showed that the muscle strength of Malaysian adolescents is much lower than that of their counterparts as reported by studies in Europe (males: 35.9±9.3kg; females: 26.2±4.9kg), the United Kingdom (males: 25.7±kg; females: 21.8±5.8kg) and Colombia of South America (males: 33.6±6.85kg; females: 24.9±4.29kg).<sup>2 15 43</sup> Also, according to the results, female adolescents in Malaysia have lower muscle strength than those in Beijing, China.<sup>44</sup> Unfortunately, there is no large population based Asian male adolescent data with which to compare with the results of the current study. Hence, this study can be considered the first documented muscle strength study among adolescents of both genders in Asia. Nevertheless, despite the lack of comparable studies, the trend for adolescents is similar to that reported for Malaysian adult population, where it was found the hand grip strength of Malaysian adults is 1.5 times lower than that of adults in Western countries.<sup>45</sup> Thus together with the findings of the current study, this may indicate that the muscle strength of the Malaysian population is relatively low from a young age. Indeed, the results of a longitudinal study conducted in Quebec, a province in eastern Canada, which tracked muscle strength from childhood to adulthood, suggested that low muscle strength can persist from childhood through adolescence and into adulthood.<sup>46</sup> Therefore, it seems worthwhile to detect low muscle strength at a young age and build it up in order to foster favourable health outcomes in later life.<sup>1</sup> Thus, it can be argued that low muscle strength among adolescents warrants particular attention in order to identify the root cause, especially if it is associated with dietary intake and physical activity which are both modifiable health-related behaviours.

The results of this study also showed that there were differences in hand grip strength, dietary intake and physical activity score between male and female adolescents. Specifically, the males had higher muscle strength, consumed more energy, protein and carbohydrate and were more physically active than their female counterparts. These findings are consistent with those of previous studies conducted on study populations aged 13 years-old.<sup>14 47 48</sup>

### Association between dietary intake, physical activity and hand grip strength

In this study, in males, energy, carbohydrate, and fat intakes and physical activity score were positively correlated with hand grip strength, but protein was negatively weak correlated (table 2). Although it has been shown that protein helps muscle protein synthesis and thus eventually improves muscle strength<sup>49</sup>, the effect of protein was not observed in this study. One possible explanation for this finding could be due to quality of protein consumed.<sup>50</sup> Often, dietary protein is ingested as a whole so it includes high biological value and low biological value and this leads to difficulty in identifying how proteins derived from animal and plant sources differ in their capacity to improve muscle mass and strength. Empirical studies have shown that at least 25 g of high quality proteins (including at least 8-10 g essential amino acids and higher leucine content)

1  
2  
3 promote muscle protein synthesis and thus result in better muscle strength.<sup>49</sup> Therefore, the specific  
4 impact of high biological value protein is worth investigating in the future.  
5  
6  
7

8 In addition, studies have also reported that energy plays a moderating role in muscle strength.<sup>22 23</sup>  
9 Although a study that used milk supplementation and resistance training as an intervention did not  
10 see an improvement in muscle mass, the researchers argued that energy plays a mediator role in  
11 the relationship between muscle mass, protein intake and resistance training despite the finding  
12 showing otherwise.<sup>23</sup> Therefore, a sufficient intake of energy and/or carbohydrate to meet the daily  
13 requirement is needed before protein can play a role in promoting muscle building and strength.  
14  
15  
16

17  
18 In the current study, when the energy intake per day and physical activity score were added into  
19 the model while controlling for BMI, both of these predictors remained significantly associated  
20 with hand grip strength. In addition, a higher energy intake and a higher physical activity score  
21 predicted a higher hand grip strength. Moreover, a higher BMI predicted a higher hand grip  
22 strength. The latter finding is consistent with that reported by a study on Southern Brazil  
23 adolescents, which found that the higher the BMI the greater the muscle strength.<sup>21</sup> Also, the  
24 researchers stated that their study population had a higher body mass, particularly muscle. As the  
25 current study did not include an objective measure for muscle mass, we considered body fat  
26 percentage and it was found that the male participants had a lower body fat percentage than the  
27 female participants. In addition, the average BMI of the (15-year-old) male participants was below  
28 the overweight level using International Obesity Task Force reference. Nevertheless, BMI is not  
29 generally regarded as a good indicator of body composition.<sup>51</sup> On the other hand, there is a general  
30 consensus that the higher the body fat, especially abdominal fat, the lower the hand grip strength.<sup>5</sup>  
31 This could be due to fat playing an inert role in muscle strength.<sup>52</sup> However, in contrast to the  
32 above-mentioned studies, a study conducted in Italy on a sample of 2411 adolescents produced a  
33 neutral result, implying that obesity does not affect muscle strength among healthy  
34 schoolchildren.<sup>53</sup> Nonetheless, the predictive equation used in the current study needs to be  
35 interpreted with caution as energy intake and physical activity only explain about 16.2% of the  
36 variation in muscle strength.  
37  
38  
39  
40  
41  
42  
43

44 In this study, no relationship was found between dietary intake, physical activity score and hand  
45 grip strength among female adolescents. This result is similar to that reported in a study on  
46 adolescents in Europe<sup>15</sup>, which showed that proline (amino acids) is positively correlated with  
47 lower limb muscular strength but that, when carbohydrate intake is controlled for, this relationship  
48 disappears.<sup>15</sup> On the other hand, a study conducted among Kenya adolescents found that female  
49 adolescents have greater muscle strength than their male counterparts and suggested that thi was  
50 because the females undertake more household chores such as transferring water from deep wells  
51 and preparing meals, and thus have greater access to food than the males.<sup>54</sup> All such activities  
52 eventually help to build upper limb muscle strength. However, these conditions are not commonly  
53 found in Malaysia where most adolescents are school attendees. It is therefore postulated that the  
54  
55  
56  
57

1  
2  
3 reason that female adolescents in this study had lower muscle strength than the males is because  
4 almost 70% of the females had a low physical activity score due to a predominantly sedentary  
5 lifestyle as compared to the males, 65% of whom had a moderate to high physical activity score.  
6 It has also been found by a previous study that females already have a lower physical activity score  
7 at an earlier age compared to males<sup>47</sup> and that this continues as they age.  
8  
9

10  
11  
12 Another possible reason for the significant result observed in males but not females could be due  
13 to changes with puberty stage, where the hand grip strength of males increases tremendously at  
14 this stage as compared to females. A study has reported that at 13 years old, the hand grip strength  
15 of males and females is 17.8 kg and 14.7 kg, respectively<sup>14</sup>. Greater muscle hypertrophy is  
16 commonly found in pre-adolescent males compared with females at the same growth stage because  
17 of increasing levels of circulating androgens in the males.<sup>55</sup> Moreover, it has also been found that  
18 muscle strength increases when a male reaches puberty, which it has been argued is related to the  
19 growth spurt due to the direct action of testosterone, which has a direct anabolic effect on muscle  
20 fibres.<sup>56</sup> In the population analysed in the current study, the majority (95%) of the males has  
21 reported that they had reached the puberty stage. Thus, in addition to the males being moderately  
22 to highly physically active, the presence of testosterone could explain the marked difference in  
23 muscle strength between the male and female participants.  
24  
25  
26  
27  
28

29  
30 Although a positive effect of protein on muscle strength was not seen in this study, it is still crucial  
31 to explore the effect of dietary protein as it is known to play a role in ensuring appropriate growth  
32 during adolescence.<sup>15</sup> Furthermore, muscle building only occurs when a person is physically  
33 active because such activity triggers the digestion and better absorption of amino acids,<sup>50 57</sup> which  
34 eventually increases muscle strength. Moreover, it is crucial to ensure that energy and carbohydrate  
35 intake requirements are met before protein can even play a role in improving muscle strength. The  
36 above findings therefore indicate that there is a strong need to undertake a longitudinal study to  
37 explore whether changes in dietary intake have an impact on hand grip strength among adolescents,  
38 and such a study also needs to take into account the variables of physical activity and weight  
39 status.  
40  
41  
42  
43

44  
45 It is also important to acknowledge that the type of physical activity can affect the hand grip  
46 strength. A cross-sectional study has suggested different types of physical activity influence hand  
47 grip strength and not the amount of time spent on physical activity.<sup>58</sup> Often, studies on muscle  
48 strength have included obesity parameters such as BMI and percentage body fat. Some of these  
49 studies have found that obese adolescents exhibit lower relative muscle strength to body mass as  
50 compared to their non-obese counterparts.<sup>6 52</sup> Some studies have found otherwise.<sup>8 53 59</sup> For  
51 instance, one such study reported that girls with normal BMI have a low hand grip strength as  
52 compared to overweight/obese girls,<sup>8</sup> and the author postulated that the overweight/obese females  
53 may have increased their muscle mass due to physical growth. However, this findings and  
54 postulation needs to be interpreted cautiously because BMI does not differentiate between fat mass  
55  
56  
57  
58  
59  
60

1  
2  
3 and fat-free mass. Moreover, the finding of that study could be due to discrepancies when  
4 examining the absolute strength and muscle strength relative to muscle mass and muscle quality.  
5 Besides dietary and physical activity factors, the literature has also shown that physical factors  
6 such as height and length of hand span can influence hand grip strength.<sup>21 60 61</sup> Although assessing  
7 the influence of physical factors was not one of this study's objectives, physical factors were found  
8 to play a role in influencing hand grip strength.  
9  
10  
11  
12

### 13 **Strengths and limitations**

14  
15 This study has a number of strengths. Firstly, it was conducted using a large sample of adolescents.  
16 Secondly, it used the standard protocols for hand grip strength, dietary intake and physical activity  
17 assessment as well as data monitoring processes during data collection, data entry and data analysis  
18 in order to minimise the risk of bias. Moreover, to the best of the authors's knowledge, this study  
19 may be the first to investigate the association between hand grip strength, dietary intake and  
20 physical activity among adolescents in Asia. However, it should be noted that this study is  
21 somewhat limited because it was cross-sectional in design, so the presence or otherwise of a causal  
22 relationship could not be established. In addition, the sample covered a narrow age range. Also,  
23 several variables such as dietary intake, physical activity and maturity stages were collected via  
24 self-completed questionnaire, which may be a limitation due to the potential for misreporting.  
25 However, no method is without its limitations and this method was pilot tested on adolescents, it  
26 was expected that it would be a reasonable approach. First, seven-day dietary record seemed the  
27 most appropriate in view of adolescents memory processing capability<sup>30</sup> and because other  
28 approaches such as indirect calorimetry were not possible in this population-based study. Second,  
29 the translated PAQ-C had previously been validated in a local setting.<sup>40</sup> Third, the self-reported  
30 puberty stage has been found to be reliable in a school-based survey with a weighted kappa  
31 coefficient of 0.68 for males and females.<sup>62</sup>  
32  
33  
34  
35  
36  
37  
38

### 39 **CONCLUSION**

40  
41 The findings of this study suggest that muscle strength is associated with energy intake and  
42 physical activity among males. However, this relationship was not found in females. This  
43 difference requires further investigation in order to gain better understanding of the issues affecting  
44 muscle strength so as to improve the provision of nutritional and physical activity strategies for  
45 the adolescent muscular health of both genders.  
46  
47  
48  
49  
50  
51  
52  
53  
54  
55  
56  
57  
58  
59  
60



## ABBREVIATIONS

**BMI**            Body Mass Index

**IQR**            Interquartile range

**Acknowledgments:** The authors would like to thank Associate Professor Dr. Mohd Nahar Azmi Mohamed, Professor Dr. Tin Tin Su and Dr. 'Abqariyah Binti Yahya for the support and guidance.

**Contributors:** AK Ng, HA Majid and NN Hairi carried out the data analysis. AK Ng drafted the manuscript. HA Majid and MY Jalaludin contributed in the design of the study and data collection. All authors contributed to the final manuscript write up.

**Funding:** This study was supported by funding received from the University Malaya's Research Programme (UMRP022A-14HTM) and Postgraduate Research Fund (PG026-2016A).

**Competing interests:** None.

**Ethical approval:** Ethics Committee of the University Malaya Medical Centre (MEC Ref. No. 896.34).

**Data availability statement:** All data relevant to the study are included in the article or uploaded as supplementary information.

## REFERENCES

1. Ortega FB, Silventoinen K, Tynelius P, et al. Muscular strength in male adolescents and premature death: cohort study of one million participants. *BMJ* 2012;345:e7279.
2. Cohen D, López-Jaramillo P, Fernández-Santos J, et al. Muscle strength is associated with lower diastolic blood pressure in schoolchildren. *Preventive medicine* 2017;95:1-6.
3. Steene-Johannessen J, Anderssen SA, Kolle E, et al. Low muscle fitness is associated with metabolic risk in youth. *Med Sci Sports Exerc* 2009;41(7):1361-7. doi: 10.1249/MSS.0b013e31819aaae5
4. Blakeley CE, Van Rompay MI, Schultz NS, et al. Relationship between muscle strength and dyslipidemia, serum 25 (OH) D, and weight status among diverse schoolchildren: a cross-sectional analysis. *BMC pediatrics* 2018;18(1):23.
5. Ruiz JR, Castro-Pinero J, Artero EG, et al. Predictive validity of health-related fitness in youth: a systematic review. *Br J Sports Med* 2009;43(12):909-23. doi: 10.1136/bjsm.2008.056499
6. Thivel D, Ring-Dimitriou S, Weghuber D, et al. Muscle Strength and Fitness in Pediatric Obesity: a Systematic Review from the European Childhood Obesity Group. *Obes Facts* 2016;9(1):52-63. doi: 10.1159/000443687
7. Timpka S, Petersson IF, Zhou C, et al. Muscle strength in adolescent men and future musculoskeletal pain: a cohort study with 17 years of follow-up. *BMJ Open* 2013;3(5) doi: 10.1136/bmjopen-2013-002656
8. Silva DAS, Pelegrini A, Chula de Castro JA, et al. Low handgrip strength levels among adolescents in a city in Southern Brazil. *Journal of Bodywork & Movement Therapies* 2017 doi: <http://dx.doi.org/10.1016/j.jbmt.2017.03.004>
9. Cohen DD, Voss C, Taylor MJ, et al. Ten-year secular changes in muscular fitness in English children. *Acta Paediatr* 2011;100(10):e175-7. doi: 10.1111/j.1651-2227.2011.02318.x
10. Dos Santos FK, Prista A, Gomes TN, et al. Secular trends in physical fitness of Mozambican school-aged children and adolescents. *Am J Hum Biol* 2015;27(2):201-6. doi: 10.1002/ajhb.22638
11. Huotari PR, Nupponen H, Laakso L, et al. Secular trends in muscular fitness among Finnish adolescents. *Scand J Public Health* 2010;38(7):739-47. doi: 10.1177/1403494810384425
12. Silverman IW. The secular trend for grip strength in Canada and the United States. *J Sports Sci* 2011;29(6):599-606. doi: 10.1080/02640414.2010.547209
13. Otero J, Cohen DD, Herrera VM, et al. Sociodemographic factors related to handgrip strength in children and adolescents in a middle income country: The SALUS study. *Am J Hum Biol* 2016;29(1) doi: 10.1002/ajhb.22896
14. Majid HA, Noran H, Jalaludin MY, et al. Poster Communications ICD Granada 2016. 17th International Congress of Dietetics 2016. Granada, Spain: Spanish Journal of Human Nutrition and Dietetics, 2016.
15. Gracia-Marco L, Bel-Serrat S, Cuenca-Garcia M, et al. Amino acids intake and physical fitness among adolescents. *Amino Acids* 2017;49(6):1041-52. doi: 10.1007/s00726-017-2393-6
16. Anjum SN, Choudary P, Dimri R, et al. Comparative evaluation of grip and pinch strength in an Asian and European population. *Hand Therapy* 2012;17(1):11-14. doi: 10.1258/ht.2011.011023
17. Keats E, C., Aviva I. Rappaport, Reena Jain, et al. Diet and Eating Practices among Adolescent Girls in Low- and Middle-Income Countries: A Systemic Review. Arlington, VA: Strengthening Partnerships, Results, and Innovations in Nutrition Globally (SPRING) project., 2017.
18. World Health Organization W. Prevalence of insufficient physical activity 2018 [cited 2018 13/7/2018]. Available from: [http://www.who.int/gho/ncd/risk\\_factors/physical\\_activity\\_text/en/](http://www.who.int/gho/ncd/risk_factors/physical_activity_text/en/) accessed 13/7/2018 2018.

19. Martinez-Gomez D, Eisenmann JC, Gomez-Martinez S, et al. Associations of physical activity and fitness with adipocytokines in adolescents: the AFINOS Study. *Nutrition, Metabolism and Cardiovascular Diseases* 2012;22(3):252-59.
20. Agostinis-Sobrinho C, Abreu S, Moreira C, et al. Muscular fitness, adherence to the Southern European Atlantic Diet and cardiometabolic risk factors in adolescents. *Nutr Metab Cardiovasc Dis* 2017;27(8):695-702. doi: 10.1016/j.numecd.2017.04.008 [published Online First: 2017/07/04]
21. Silva DAS, Martins PC. Impact of physical growth, body adiposity and lifestyle on muscular strength and cardiorespiratory fitness of adolescents. *Journal of Bodywork and Movement Therapies* 2017 doi: 10.1016/j.jbmt.2017.01.007
22. Kulkarni B, Kuper H, Radhakrishna KV, et al. The association of early life supplemental nutrition with lean body mass and grip strength in adulthood: evidence from APCAPS. *Am J Epidemiol* 2014;179(6):700-9. doi: 10.1093/aje/kwt332
23. Lambourne K, Washburn R, Lee J, et al. A 6-month trial of resistance training with milk supplementation in adolescents: effects on body composition. *International journal of sport nutrition and exercise metabolism* 2013;23(4):344-56.
24. Argilés JM, Campos N, Lopez-Pedrosa JM, et al. Skeletal muscle regulates metabolism via interorgan crosstalk: roles in health and disease. *Journal of the American Medical Directors Association* 2016;17(9):789-96.
25. Otero J, Cohen DD, Herrera VM, et al. Sociodemographic factors related to handgrip strength in children and adolescents in a middle income country: The SALUS study. *Am J Hum Biol* 2017;29(1) doi: 10.1002/ajhb.22896 [published Online First: 2016/07/19]
26. Hazreen MA, Su TT, Jalaludin MY, et al. An exploratory study on risk factors for chronic non-communicable diseases among adolescents in Malaysia: overview of the Malaysian Health and Adolescents Longitudinal Research Team study (The MyHeART study). *BMC Public Health* 2014;14 Suppl 3:S6. doi: 10.1186/1471-2458-14-S3-S6
27. Wind AE, Takken T, Helder PJ, et al. Is grip strength a predictor for total muscle strength in healthy children, adolescents, and young adults? *Eur J Pediatr* 2010;169(3):281-7. doi: 10.1007/s00431-009-1010-4
28. Pillsbury L, Oria M, Pate R. Fitness measures and health outcomes in youth: National Academies Press 2013.
29. Malaysian Health and Adolescents Longitudinal Research Team (MyHeART) Study Handbook. Kuala Lumpur: University of Malaya Press 2019.
30. Burrows TL, Martin RJ, Collins CE. A systematic review of the validity of dietary assessment methods in children when compared with the method of doubly labeled water. *J Am Diet Assoc* 2010;110(10):1501-10. doi: 10.1016/j.jada.2010.07.008
31. Willett W. Nutritional epidemiology: Oxford University Press 2012.
32. Livingstone MB, Prentice AM, Coward WA, et al. Validation of estimates of energy intake by weighed dietary record and diet history in children and adolescents. *The American journal of clinical nutrition* 1992;56(1):29-35.
33. Livingstone MBE, Robson PJ, Wallace JMW. Issues in dietary intake assessment of children and adolescents. *British Journal of Nutrition* 2004;92(S2):S213-S22.
34. Tee ES, Noor MI, Azudin MN, et al. The Nutrient Composition of Malaysian Food (4th edition)1997.
35. Day S, Fayers P, Harvey D. Double Data Entry: What Value, What Price? *Controlled Clinical Trials* 1998;19(1):15-24. doi: [https://doi.org/10.1016/S0197-2456\(97\)00096-2](https://doi.org/10.1016/S0197-2456(97)00096-2)
36. Berkey CS, Rockett HR, Field AE, et al. Activity, dietary intake, and weight changes in a longitudinal study of preadolescent and adolescent boys and girls. *Pediatrics* 2000;105(4):e56-e56.

- 1
- 2
- 3
- 4 37. Kowalski KC, Crocker PR, Faulkner RA. Validation of the physical activity questionnaire for older
- 5 children. *Pediatric exercise science* 1997;9(2):174-86.
- 6 38. Dan S, Mohd N, Zalilah M. Determination of factors associated with physical activity levels among
- 7 adolescents attending school in Kuantan, Malaysia. *Malays J Nutr* 2011;17(2):175-817.
- 8 39. Nor Aini J, Poh BK, Chee WSS. Validity of a children's physical activity questionnaire (cPAQ) for the
- 9 study of bone health. *Pediatrics International* 2013;55(2):223-28.
- 10 40. Dan S, Zalilah M. Sex and ethnic differentials in physical activity levels of adolescents in Kuantan.
- 11 *Malaysian journal of nutrition* 2007;13(2):109-20.
- 12 41. Crocker P, Bailey DA, Faulkner RA, et al. Measuring general levels of physical activity: preliminary
- 13 evidence for the Physical Activity Questionnaire for Older Children. *Medicine and science in*
- 14 *sports and exercise* 1997;29(10):1344-49.
- 15 42. Pelegrini A, Silva DAS, de Lima Silva JMF, et al. Anthropometric indicators of obesity in the prediction
- 16 of high body fat in adolescents. *Revista Paulista de Pediatria (English Edition)* 2015;33(1):56-62.
- 17 doi: [https://doi.org/10.1016/S2359-3482\(15\)30031-2](https://doi.org/10.1016/S2359-3482(15)30031-2)
- 18 43. Sandercock GR, Lobelo F, Correa-Bautista JE, et al. The relationship between socioeconomic status,
- 19 family income, and measures of muscular and cardiorespiratory fitness in Colombian
- 20 schoolchildren. *The Journal of pediatrics* 2017;185:81-87. e2.
- 21 44. Foo LH, Zhang Q, Zhu K, et al. Low vitamin D status has an adverse influence on bone mass, bone
- 22 turnover, and muscle strength in Chinese adolescent girls. *J Nutr* 2009;139(5):1002-7. doi:
- 23 10.3945/jn.108.102053
- 24 45. Kamarul T, Ahmad TS, Loh W. Hand grip strength in the adult Malaysian population. *Journal of*
- 25 *Orthopaedic Surgery* 2006;14(2):172-77.
- 26 46. Trudeau F, Shephard RJ, Arsenaault F, et al. Tracking of physical fitness from childhood to adulthood.
- 27 *Canadian Journal of Applied Physiology* 2003;28(2):257-71.
- 28 47. Su TT, Sim PY, Nahar AM, et al. Association between self-reported physical activity and indicators of
- 29 body composition in Malaysian adolescents. *Prev Med* 2014;67:100-5. doi:
- 30 10.1016/j.ypmed.2014.07.001
- 31 48. Majid HA, Ramli L, Ying SP, et al. Dietary Intake among Adolescents in a Middle-Income Country: An
- 32 Outcome from the Malaysian Health and Adolescents Longitudinal Research Team Study (the
- 33 MyHeARTs Study). *PLoS One* 2016;11(5):e0155447. doi: 10.1371/journal.pone.0155447
- 34 49. Breen L, Phillips SM. Interactions between exercise and nutrition to prevent muscle waste during
- 35 ageing. *Br J Clin Pharmacol* 2013;75(3):708-15. doi: 10.1111/j.1365-2125.2012.04456.x
- 36 50. Strasser B, Volaklis K, Fuchs D, et al. Role of Dietary Protein and Muscular Fitness on Longevity and
- 37 Aging. *Aging and Disease* 2018;9(1):119-32. doi: 10.14336/AD.2017.0202
- 38 51. Freedman DS, Sherry B. The validity of BMI as an indicator of body fatness and risk among children.
- 39 *Pediatrics* 2009;124(Supplement 1):S23-S34.
- 40 52. Tomlinson DJ, Erskine RM, Morse CI, et al. The impact of obesity on skeletal muscle strength and
- 41 structure through adolescence to old age. *Biogerontology* 2016;17(3):467-83. doi:
- 42 10.1007/s10522-015-9626-4
- 43 53. Ceschia A, Giacomini S, Santarossa S, et al. Deleterious effects of obesity on physical fitness in pre-
- 44 pubertal children. *European Journal of Sport Science* 2015;16:1-8. doi:
- 45 10.1080/17461391.2015.1030454
- 46 54. Little MA. Grip strength and body composition in Turkana pastoralist children and adolescents.
- 47 *American Journal of Human Biology* 2017;29(2):e22922. doi: doi:10.1002/ajhb.22922
- 48 55. Faigenbaum AD, Kraemer WJ, Blimkie CJ, et al. Youth resistance training: updated position statement
- 49 paper from the national strength and conditioning association. *The Journal of Strength &*
- 50 *Conditioning Research* 2009;23:S60-S79.
- 51
- 52
- 53
- 54
- 55
- 56
- 57
- 58
- 59
- 60

- 1  
2  
3 56. McComas A, Sica R, Petito F. Muscle strength in boys of different ages. *Journal of Neurology, Neurosurgery & Psychiatry* 1973;36(2):171-73.  
4  
5 57. Wu G. Dietary protein intake and human health. *Food & function* 2016;7(3):1251-65.  
6  
7 58. Mattioli RÁ, Cavalli AS, Ribeiro JAB, et al. Association between handgrip strength and physical  
8 activity in hypertensive elderly individuals. *Revista Brasileira de Geriatria e Gerontologia*  
9 2015;18(4):881-91.  
10 59. Ravisankar P, Udupa K, Prakash ES. Correlation between body mass index and blood pressure  
11 indices, handgrip strength and handgrip endurance in underweight, normal weight and  
12 overweight adolescents. *Indian journal of physiology and pharmacology* 2005;49(4):455.  
13 60. Ploegmakers JJ, Hepping AM, Geertzen JH, et al. Grip strength is strongly associated with height,  
14 weight and gender in childhood: a cross sectional study of 2241 children and adolescents  
15 providing reference values. *Journal of physiotherapy* 2013;59(4):255-61.  
16 61. Jurimae T, Hurbo T, Jurimae J. Relationship of handgrip strength with anthropometric and body  
17 composition variables in prepubertal children. *Homo* 2009;60(3):225-38. doi:  
18 10.1016/j.jchb.2008.05.004  
19  
20 62. Jaruratanasirikul S, Kreetapirom P, Tassanakijpanich N, et al. Reliability of pubertal maturation self-  
21 assessment in a school-based survey. *Journal of Pediatric Endocrinology and Metabolism*,  
22 2015:367.  
23  
24  
25  
26  
27  
28  
29  
30  
31  
32  
33  
34  
35  
36  
37  
38  
39  
40  
41  
42  
43  
44  
45  
46  
47  
48  
49  
50  
51  
52  
53  
54  
55  
56  
57  
58  
59  
60



Flowchart of the participant sampling procedure

173x143mm (96 x 96 DPI)

**STROBE 2007 (v4) checklist of items to be included in reports of observational studies in epidemiology\***  
**Checklist for cohort, case-control, and cross-sectional studies (combined)**

| Section/Topic             | Item # | Recommendation                                                                                                                                                                                                                                                                                                                                                                                                                                                         | Reported on page # |
|---------------------------|--------|------------------------------------------------------------------------------------------------------------------------------------------------------------------------------------------------------------------------------------------------------------------------------------------------------------------------------------------------------------------------------------------------------------------------------------------------------------------------|--------------------|
| Title and abstract        | 1      | (a) Indicate the study's design with a commonly used term in the title or the abstract                                                                                                                                                                                                                                                                                                                                                                                 | 1                  |
|                           |        | (b) Provide in the abstract an informative and balanced summary of what was done and what was found                                                                                                                                                                                                                                                                                                                                                                    | 1                  |
| <b>Introduction</b>       |        |                                                                                                                                                                                                                                                                                                                                                                                                                                                                        |                    |
| Background/rationale      | 2      | Explain the scientific background and rationale for the investigation being reported                                                                                                                                                                                                                                                                                                                                                                                   | 3                  |
| Objectives                | 3      | State specific objectives, including any pre-specified hypotheses                                                                                                                                                                                                                                                                                                                                                                                                      | 3                  |
| <b>Methods</b>            |        |                                                                                                                                                                                                                                                                                                                                                                                                                                                                        |                    |
| Study design              | 4      | Present key elements of study design early in the paper                                                                                                                                                                                                                                                                                                                                                                                                                | 4                  |
| Setting                   | 5      | Describe the setting, locations, and relevant dates, including periods of recruitment, exposure, follow-up, and data collection                                                                                                                                                                                                                                                                                                                                        | 4                  |
| Participants              | 6      | (a) <i>Cohort study</i> —Give the eligibility criteria, and the sources and methods of selection of participants. Describe methods of follow-up<br><i>Case-control study</i> —Give the eligibility criteria, and the sources and methods of case ascertainment and control selection. Give the rationale for the choice of cases and controls<br><i>Cross-sectional study</i> —Give the eligibility criteria, and the sources and methods of selection of participants | 4                  |
|                           |        | (b) <i>Cohort study</i> —For matched studies, give matching criteria and number of exposed and unexposed<br><i>Case-control study</i> —For matched studies, give matching criteria and the number of controls per case                                                                                                                                                                                                                                                 | Not applicable     |
| Variables                 | 7      | Clearly define all outcomes, exposures, predictors, potential confounders, and effect modifiers. Give diagnostic criteria, if applicable                                                                                                                                                                                                                                                                                                                               | 4-5                |
| Data sources/ measurement | 8*     | For each variable of interest, give sources of data and details of methods of assessment (measurement). Describe comparability of assessment methods if there is more than one group                                                                                                                                                                                                                                                                                   | 4-5                |
| Bias                      | 9      | Describe any efforts to address potential sources of bias                                                                                                                                                                                                                                                                                                                                                                                                              | Not applicable     |
| Study size                | 10     | Explain how the study size was arrived at                                                                                                                                                                                                                                                                                                                                                                                                                              | 4                  |
| Quantitative variables    | 11     | Explain how quantitative variables were handled in the analyses. If applicable, describe which groupings were chosen and why                                                                                                                                                                                                                                                                                                                                           | 6                  |
| Statistical methods       | 12     | (a) Describe all statistical methods, including those used to control for confounding                                                                                                                                                                                                                                                                                                                                                                                  | 6                  |
|                           |        | (b) Describe any methods used to examine subgroups and interactions                                                                                                                                                                                                                                                                                                                                                                                                    | 6                  |
|                           |        | (c) Explain how missing data were addressed                                                                                                                                                                                                                                                                                                                                                                                                                            | Not applicable     |
|                           |        | (d) <i>Cohort study</i> —If applicable, explain how loss to follow-up was addressed<br><i>Case-control study</i> —If applicable, explain how matching of cases and controls was addressed                                                                                                                                                                                                                                                                              | Not applicable     |



|                          |     |                                                                                                                                                                                                              |                |
|--------------------------|-----|--------------------------------------------------------------------------------------------------------------------------------------------------------------------------------------------------------------|----------------|
|                          |     | <i>Cross-sectional study</i> —If applicable, describe analytical methods taking account of sampling strategy                                                                                                 |                |
|                          |     | (e) Describe any sensitivity analyses                                                                                                                                                                        | Not applicable |
| <b>Results</b>           |     |                                                                                                                                                                                                              |                |
| Participants             | 13* | (a) Report numbers of individuals at each stage of study—eg numbers potentially eligible, examined for eligibility, confirmed eligible, included in the study, completing follow-up, and analysed            | 6              |
|                          |     | (b) Give reasons for non-participation at each stage                                                                                                                                                         | 6              |
|                          |     | (c) Consider use of a flow diagram                                                                                                                                                                           | Not applicable |
| Descriptive data         | 14* | (a) Give characteristics of study participants (eg demographic, clinical, social) and information on exposures and potential confounders                                                                     | 6, 8-9         |
|                          |     | (b) Indicate number of participants with missing data for each variable of interest                                                                                                                          | 6              |
|                          |     | (c) <i>Cohort study</i> —Summarise follow-up time (eg, average and total amount)                                                                                                                             | Not applicable |
| Outcome data             | 15* | <i>Cohort study</i> —Report numbers of outcome events or summary measures over time                                                                                                                          | Not applicable |
|                          |     | <i>Case-control study</i> —Report numbers in each exposure category, or summary measures of exposure                                                                                                         | Not applicable |
|                          |     | <i>Cross-sectional study</i> —Report numbers of outcome events or summary measures                                                                                                                           | Not applicable |
| Main results             | 16  | (a) Give unadjusted estimates and, if applicable, confounder-adjusted estimates and their precision (eg, 95% confidence interval). Make clear which confounders were adjusted for and why they were included | 6-7, 10        |
|                          |     | (b) Report category boundaries when continuous variables were categorized                                                                                                                                    | Not applicable |
|                          |     | (c) If relevant, consider translating estimates of relative risk into absolute risk for a meaningful time period                                                                                             | Not applicable |
| Other analyses           | 17  | Report other analyses done—eg analyses of subgroups and interactions, and sensitivity analyses                                                                                                               | Not applicable |
| <b>Discussion</b>        |     |                                                                                                                                                                                                              |                |
| Key results              | 18  | Summarise key results with reference to study objectives                                                                                                                                                     | 11-13          |
| Limitations              | 19  | Discuss limitations of the study, taking into account sources of potential bias or imprecision. Discuss both direction and magnitude of any potential bias                                                   | 13             |
| Interpretation           | 20  | Give a cautious overall interpretation of results considering objectives, limitations, multiplicity of analyses, results from similar studies, and other relevant evidence                                   | 13             |
| Generalisability         | 21  | Discuss the generalisability (external validity) of the study results                                                                                                                                        | 13             |
| <b>Other information</b> |     |                                                                                                                                                                                                              |                |
| Funding                  | 22  | Give the source of funding and the role of the funders for the present study and, if applicable, for the original study on which the present article is based                                                | 14             |

\*Give information separately for cases and controls in case-control studies and, if applicable, for exposed and unexposed groups in cohort and cross-sectional studies.

**Note:** An Explanation and Elaboration article discusses each checklist item and gives methodological background and published examples of transparent reporting. The STROBE checklist is best used in conjunction with this article (freely available on the Web sites of PLoS Medicine at <http://www.plosmedicine.org/>, Annals of Internal Medicine at <http://www.annals.org/>, and Epidemiology at <http://www.epidem.com/>). Information on the STROBE Initiative is available at [www.strobe-statement.org](http://www.strobe-statement.org).

# BMJ Open

## Dietary intake, physical activity and muscle strength among adolescents: the Malaysian Health and Adolescents Longitudinal Research Team (MyHeART) study

|                                 |                                                                                                                                                                                                                                                                                                                                                                                                                                                                                                                                                                                                                                                   |
|---------------------------------|---------------------------------------------------------------------------------------------------------------------------------------------------------------------------------------------------------------------------------------------------------------------------------------------------------------------------------------------------------------------------------------------------------------------------------------------------------------------------------------------------------------------------------------------------------------------------------------------------------------------------------------------------|
| Journal:                        | <i>BMJ Open</i>                                                                                                                                                                                                                                                                                                                                                                                                                                                                                                                                                                                                                                   |
| Manuscript ID                   | bmjopen-2018-026275.R3                                                                                                                                                                                                                                                                                                                                                                                                                                                                                                                                                                                                                            |
| Article Type:                   | Research                                                                                                                                                                                                                                                                                                                                                                                                                                                                                                                                                                                                                                          |
| Date Submitted by the Author:   | 31-May-2019                                                                                                                                                                                                                                                                                                                                                                                                                                                                                                                                                                                                                                       |
| Complete List of Authors:       | Ng, Ai Kah; University of Malaya, Faculty of Medicine, Department of Social and Preventive Medicine; International Medical University, School of Health Sciences, Nutrition and Dietetics Department<br>Hairi, Noran; University of Malaya, Faculty of Medicine, Centre for Epidemiology & Evidence-Based Practice and Department of Social and Preventive Medicine<br>Jalaludin, Muhammad Yazid; University of Malaya, Faculty of Medicine, Department of Paediatrics<br>Majid, Hazreen; University of Malaya, Faculty of Medicine, Department of Social and Preventive Medicine; Harvard University T H Chan School of Public Health, Nutrition |
| <b>Primary Subject Heading</b>: | Public health                                                                                                                                                                                                                                                                                                                                                                                                                                                                                                                                                                                                                                     |
| Secondary Subject Heading:      | Paediatrics, Nutrition and metabolism                                                                                                                                                                                                                                                                                                                                                                                                                                                                                                                                                                                                             |
| Keywords:                       | Hand grip strength, Dietary intake, Adolescents, Physical activity, muscle strength                                                                                                                                                                                                                                                                                                                                                                                                                                                                                                                                                               |
|                                 |                                                                                                                                                                                                                                                                                                                                                                                                                                                                                                                                                                                                                                                   |

SCHOLARONE™  
Manuscripts

1  
2  
3 *Research article*  
4  
5

6 **Dietary intake, physical activity and muscle strength among adolescents: the Malaysian**  
7 **Health and Adolescents Longitudinal Research Team (MyHeART) study**  
8  
9

10  
11  
12  
13  
14 AK Ng<sup>1</sup>, NN Hairi<sup>3</sup>, MY Jalaludin<sup>4</sup>, HA Majid<sup>1,2,5</sup>  
15  
16

17  
18  
19  
20 <sup>1</sup> Centre for Population Health, Department of Social and Preventive Medicine, Faculty of  
21 Medicine, University Malaya, 50603 Kuala Lumpur, Malaysia.  
22

23  
24  
25 <sup>2</sup> Department of Nutrition, Harvard Chan School of Public Health, 677 Huntington Avenue, Boston  
26 MA 02115  
27

28  
29  
30 <sup>3</sup> Centre for Epidemiology & Evidence-Based Practice, Department of Social and Preventive  
31 Medicine, Faculty of Medicine, University Malaya, 50603 Kuala Lumpur, Malaysia.  
32

33  
34  
35 <sup>4</sup> Department of Paediatrics, Faculty of Medicine, University Malaya, 50603 Kuala Lumpur,  
36 Malaysia.  
37

38  
39  
40 <sup>5</sup> Department of Nutrition, Faculty of Public Health, Universitas Airlangga, Jawa Timur 60115,  
41 Indonesia.  
42  
43  
44  
45  
46  
47  
48  
49  
50  
51  
52  
53  
54  
55  
56  
57  
58  
59  
60

1  
2  
3  
4  
5  
6  
7  
8  
9  
10  
11  
12 **Contact number, email addresses and postal addresses for each author:**  
13

14  
15 Noran Naqiah Hairi:

16  
17  
18 Contact no: +603-79674762  
19

20  
21 Email address: [noran@ummc.edu.my](mailto:noran@ummc.edu.my)  
22

23  
24 Postal address: Department of Social and Preventive Medicine, Faculty of Medicine,  
25  
26 University of Malaya, 50603 Kuala Lumpur, Malaysia  
27  
28  
29  
30  
31

32 Muhammad Yazid Jalaludin:

33  
34  
35 Contact no: +603-79492417  
36

37  
38 Email address: [yazidj@ummc.edu.my](mailto:yazidj@ummc.edu.my)  
39

40  
41 Postal address: Department of Paediatrics, Faculty of Medicine, University of Malaya,  
42  
43 50603 Kuala Lumpur, Malaysia  
44  
45  
46  
47  
48

49 Ng Ai Kah:

50  
51  
52 Phd Candidate  
53

54  
55 Contact no: +6017-3846869  
56  
57  
58  
59  
60

1  
2  
3 Email address: [ngaikah@siswa.um.edu.my](mailto:ngaikah@siswa.um.edu.my)  
4  
5

6 Postal address: Department of Social and Preventive Medicine, Faculty of Medicine,  
7  
8 University of Malaya, 50603 Kuala Lumpur, Malaysia  
9

10  
11 **Corresponding author:**  
12

13  
14 Majid HA, Associate Professor, PhD, RD, Faculty of Medicine, Department of Social and  
15 Preventive Medicine, University of Malaya, Kuala Lumpur, Malaysia  
16

17 E-mail: [hazreen@ummc.edu.my](mailto:hazreen@ummc.edu.my)  
18

19  
20  
21  
22 [hazreen.abdulmajid@gmail.com](mailto:hazreen.abdulmajid@gmail.com)  
23  
24  
25  
26  
27

28 **Word Count**, excluding title page, abstract, references, figures and tables: 4000 words.  
29  
30

31  
32  
33  
34 **Tables:** 3  
35  
36  
37  
38  
39

40 **Figure:** 1  
41  
42  
43  
44  
45

46 **Funding Statement:** This study was supported by funding received from the University Malaya's  
47 Research Programme (UMRP022A-14HTM) and Postgraduate Research Fund (PG026-2016A).  
48  
49  
50

51  
52  
53  
54 **Funding**  
55  
56  
57

1  
2  
3 University of Malaya Research Grant (UMRP022A-14HTM), UMSC grant cycle 1-2016 and all  
4 the school children who participated in this study. The funding bodies did not contribute to the  
5 design of the study, data collection, analysis, or interpretation of data.  
6  
7  
8

9  
10 **Disclosure:** The authors declare that they have no conflict of interests.  
11  
12

13 **Author Contributions/ Statement of authorship:** AK Ng, HA Majid and NN Hairi carried out  
14 the data analysis. AK Ng drafted the manuscript. HA Majid and NN Hairi contributed in the design  
15 of the study. HA Majid and MY Jalaludin involved with the data collection. All authors contributed  
16 to the final manuscript write up.  
17  
18  
19  
20  
21  
22  
23  
24  
25  
26

### 27 **Ethics approval and consent to participate**

28  
29 Ethical approval was obtained from the Medical Ethics Committee, University Malaya Medical  
30 Centre (MEC Ref. No: 896.34). The National Medical Research Register number is 14-376-20486.  
31  
32 Participation in the study was voluntary and written informed consent and ascent for participation  
33 in the study was obtained from the parents or guardian as well as the participants.  
34  
35  
36  
37  
38  
39  
40  
41  
42  
43  
44  
45  
46  
47  
48  
49  
50  
51  
52  
53  
54  
55  
56  
57  
58  
59  
60

1  
2  
3  
4  
5  
6  
7  
8  
9  
10  
11  
12  
13 **Title: Dietary intake, physical activity and muscle strength among adolescents: the**  
14 **Malaysian Health and Adolescents Longitudinal Research Team (MyHeART) study**  
15

16  
17  
18 **ABSTRACT**

19  
20 **Objective:** To examine the role of dietary intake and physical activity in muscle strength among  
21 adolescents.  
22

23 **Design:** Cross-sectional analysis.  
24

25 **Setting:** The Malaysian Health and Adolescents Longitudinal Research Team (MyHeART) study.  
26

27 **Participants:** Fifteen-year-old secondary school children who have given consent and who  
28 participated in the MyHeART study in 2014.  
29

30 **Primary outcome measure:** Muscle strength was measured in relation to dietary intake (energy  
31 and macronutrients) and physical activity by using a hand grip dynamometer.  
32

33 **Results:** Among the 1012 participants (395 male; 617 female), the hand grip strength of the males  
34 was higher than that of the females (27.08 kg vs 18.63 kg;  $p<0.001$ ). Also, males were more active  
35 (2.43 vs 2.12;  $p<0.001$ ) and consumed a higher amount energy (2047 kcal vs 1738 kcal,  $p<0.001$ ),  
36 carbohydrate (280.71 g vs 229.31 g;  $p<0.001$ ) and protein (1.46g/kgBW vs 1.35g/kgBW;  
37  $p<0.168$ ). After controlling for ethnicity, place of residency and body mass index (BMI), there was  
38 a positive relationship between hand grip strength and the intake of energy ( $r=0.14$ ;  $p=0.006$ ),  
39 carbohydrate ( $r=0.153$ ;  $p=0.002$ ) and fat ( $r=0.124$ ;  $p=0.014$ ) and the physical activity score  
40 ( $r=0.170$ ;  $p=0.001$ ) and a negative relationship between hand grip strength and the intake of  
41 protein ( $r=-0.134$ ;  $p=0.008$ ), for males. However, this was not observed among females.  
42  
43  
44

45 **Conclusions:** Energy, carbohydrate and fat intakes and physical activity score were positively  
46 correlated with hand grip strength while protein intake was negatively correlated with hand grip  
47 strength in males but not in females.  
48  
49  
50

51 **Keywords:** Muscle strength, Hand grip strength, Dietary intake, Physical activity, Adolescents  
52  
53  
54  
55  
56  
57  
58  
59  
60



## ARTICLE SUMMARY

### Strengths and limitations of this study

- The main strengths of this study are that it used a large sample of adolescents and the standardised measurement of muscle strength.
- This study is also the first to investigate the association between dietary intake, physical activity and muscle strength among adolescents in Asia.
- The main limitations of this study are that the sample covers a limited age range and the cross-sectional design of the study does not allow any causality interpretations.

## INTRODUCTION

Recent research has paid much attention to poor muscles strength among adolescents and its association with adverse health-related outcomes, including cardiovascular disease,<sup>1</sup> poorer metabolic profile,<sup>2-4</sup> obesity<sup>5 6</sup> and musculoskeletal pain<sup>7</sup> as well as premature death from any cause.<sup>1</sup> Furthermore, a cross-sectional study among adolescents in a city in southern Brazil reported a prevalence of low muscle strength of 47% among the study population.<sup>8</sup> Moreover, most studies have suggested that there is a declining trend of muscle strength among adolescents over time<sup>9-12</sup> except for a study conducted in Colombia<sup>13</sup> that indicated otherwise. The study in Colombia, a middle-income country, also found that, adolescents have a lower hand grip strength compared to those in high-income countries.<sup>13</sup> Similarly, a preliminary finding from the MyHeART study showed that Malaysian adolescents have a lower handgrip strength than those in other countries.<sup>9 14 15</sup> However, it was not possible to categorise the hand grip strength of Malaysian adolescents based on the cutoff values used<sup>8</sup> as there were no available normal values for Asian adolescents. Moreover, the published cutoff values should not be used as the reference standard for Asian populations because most Asians are not able to achieve the published cutoff values.<sup>16</sup>

Issues pertaining to unhealthy dietary intake<sup>17</sup> and low physical activity<sup>18</sup> among adolescents are well documented worldwide,. In fact, dietary intake and/or low physical activity are increasingly recognised to be modifiable health-related behavioural determinants of muscle strength among adolescents.<sup>15 19-21</sup> the results reported by population-based cohort studies regarding the effect of energy and macronutrient intake are limited at this point in time.<sup>15 22</sup> For instance, a cross-sectional study that was conducted among European adolescents found that specific amino acids are associated with muscle strength; however, when carbohydrate is controlled for, these relationships disappear.<sup>15</sup> Another cohort study from India in which pregnant women and children were given a balanced protein-calorie supplementation and the children were followed up at adult stage, also emphasised the importance of an adequate energy intake in order to increase muscle strength. The cohort study also found that energy intake and physical activity are positively associated with muscle strength.<sup>22</sup> Furthermore, an experimental study on adolescents found that milk supplementation with resistance training does not change body composition.<sup>23</sup> However, the authors argued that it could be due to energy intake playing a vital role in the relationship between body composition, resistance training and the effect of these factors on both muscle mass and strength.<sup>23</sup>

In view of the changes that take place in the skeletal muscle in response to energy and macronutrient intake particularly carbohydrate and protein intake, in normal physiology<sup>24</sup>, it is worthwhile to further investigate the relationship between dietary intake, particularly energy and macronutrients, and muscle strength. While previous studies have provided some evidences to

1  
2  
3 demonstrate that low level of physical activity<sup>8 25</sup> and being overweight<sup>8</sup> are associated with low  
4 hand grip strength, there was only a study by Gracia-Marco et al (2017) has evaluated the effect  
5 of amino acids (dietary protein) and physical activity on hand grip strength.<sup>15</sup> It seems that no  
6 study have evaluated the influence of dietary intake and physical activity on hand grip strength  
7 among adolescents specifically. Thus, the relationship between dietary intake, physical activity  
8 and muscle strength among adolescents is not yet well understood. Moreover, to the best of the  
9 authors' knowledge, only a limited number of studies have investigated the association between  
10 hand grip strength, dietary intake and/or physical activity among adolescents, particularly in Asia.  
11 Therefore, the purpose of this paper is to examine the association between hand grip strength,  
12 dietary intake and physical activity among adolescents in Malaysia.  
13  
14  
15  
16  
17

## 18 **METHODS**

19  
20 This cross-sectional study is a secondary analysis of data derived from the first follow-up of the  
21 Malaysian Health and Adolescents Longitudinal Research Team (MyHeART) study. The  
22 population for the current study was comprised of 15-year-old adolescents attending public  
23 secondary schools in the central and northern regions of Peninsular Malaysia. The sampling  
24 method used was multistage random sampling. The primary sampling units were the schools and  
25 the secondary sampling units were the students. In the first stage, the study frame was a complete  
26 list of public schools in the two above-mentioned regions from which total of 15 public secondary  
27 schools were selected. In the second stage, the defined study population was selected from a  
28 complete list of Form Three students in each of the selected school. Full details of the original  
29 MyHeART study protocol have been published elsewhere.<sup>26</sup>  
30  
31  
32  
33  
34

35 An information sheet and consent forms were given to the students and their parents/guardian prior  
36 to recruitment. Participation in the study was on a voluntary basis. In 2014, 1230 adolescents were  
37 recruited for the MyHeART study. Out of the total participants in 2014, 1012 (82.3%) were  
38 included in the analysis for this paper. A flowchart of the sampling procedure used to select the  
39 participants for this study is provided in Figure 1.  
40  
41  
42  
43

44 The MyHeART study was approved by the Ethics Committee of the University Malaya Medical  
45 Centre (MEC Ref. No. 896.34). Subsequently, formal approval was obtained from the Ministry of  
46 Health and Ministry of Education and then approval was sought from the relevant state level  
47 administrative authorities before approaching the Headmasters and Headmistresses of the selected  
48 schools.  
49  
50  
51

52 The data collection was conducted by the MyHeART team, which was led by the principal  
53 investigator. The team consisted of 20 research assistants (medical doctors, nurses and dietitians)  
54 who collected the data at various stations such as anthropometry, hand grip strength and dietary  
55  
56  
57  
58  
59  
60

1  
2  
3 stations. The data was collected between March and May in 2014. Prior to conducting data  
4 collection, Principle Investigator provided orientation and training sessions for the research  
5 assistants in order to familiarise them with the objectives and methodology of the study as well as  
6 hands-on practice in measuring the anthropometrics and hand grip strength. In addition, the  
7 researcher assistants who were dietitians received training on how to conduct the seven-days diet  
8 history using standardised portion of food and how to translate the diet history into a coding sheet  
9 in order to ensure the consistency and quality of the collected data.  
10  
11  
12  
13

### 14 **Muscle strength**

15  
16 Hand grip strength has been shown to have moderate to strong validity and high reliability in tests  
17 for upper body and lower body strength in adolescents.<sup>27</sup> Moreover, hand grip strength has been  
18 found to be valid, reliable and feasible for school setting.<sup>28</sup> Therefore muscle strength was assessed  
19 by using hand grip strength. A calibrated hand dynamometer (Jamar, Sammons Preston Rolyan,  
20 Illinois, US), whose unit of measurement is the kilogram, was used in the assessment of hand grip  
21 strength. The strength of the dominant and the non-dominant hand was recorded. Prior to the  
22 measurements being taken, the dynamometer was calibrated. Then, it was adjusted for different  
23 hand sizes. Participants were gathered in a hall. . The hand grip strength measurement was taken  
24 in the morning before afternoon (between 10 am to 12 pm). Each participant was positioned in a  
25 straight back chair with both feet flat on the ground. The elbow was flexed to 90° with forearm  
26 and wrist were in neutral position. The measurement began with dominant hand once the dominant  
27 hand was identified. The measurement followed by the non-dominant hand. The dominant and  
28 non-dominant hands of the participants were each tested three times and the readings were  
29 recorded to the nearest 0.1 kg.<sup>29</sup> The average of the three readings for the dominant hand was used  
30 in analysis. All the measurements were done by trained research assistants.  
31  
32  
33  
34  
35  
36  
37

### 38 **Dietary intakes**

39 Dietary intake was assessed by using a 7-day diet history. The diet history is the best method by  
40 which to estimate adolescents' intakes because they can better recall what they have eaten and  
41 drunk and this history can thus reveal more accurate information about their overall intakes.<sup>30</sup> This  
42 method also shows less variation in dietary assessment from the epidemiological perspective<sup>31</sup> and  
43 is more representative of adolescents' habitual intakes than other methods.<sup>32 33</sup> The seven-day diet  
44 history was collected by trained research assistants who were qualified dietitians. The *Nutrient*  
45 *Composition of Malaysian Food* (4th edition)<sup>34</sup> was used to calculate energy and macronutrient  
46 intakes and the values were entered into the Nutritionist Pro™ database (Axxya Systems, USA).<sup>34</sup>  
47 The intakes from food items and recipes that could not be found in the *Nutrient Composition of*  
48 *Malaysian Food* were calculated on the basis of the details provided by the food packaging and  
49 the recipe. These calculations were then entered into the database by adjusting them based on  
50 standard recipes (per serving size). After the diet history had been analysed, 10% of the data was  
51 randomly cross-checked by an independent qualified dietitian who was not involved in analysing  
52 the dietary data. The margin of error was 4.4%. It was seemed acceptable as it has been stated that  
53  
54  
55  
56  
57  
58  
59  
60

1  
2  
3 a 10% margin of error is acceptable.<sup>35</sup> Total of 76 participants with implausible energy intakes  
4 (<500 kcal/day or >5000 kcal/day) were excluded from this analysis.<sup>36</sup>  
5  
6  
7

### 8 **Physical activity score**

9

10 A Malay version of the validated physical activity questionnaire for older children (PAQ-C)  
11 consisting of 10 items was used to obtain the physical activity level of the adolescents over the  
12 past 7 days. The PAC-Q questionnaire has been shown to be valid and to have good internal  
13 consistency.<sup>37-39</sup> The translated version has been validated in a local setting.<sup>40</sup> The first item in the  
14 questionnaire was used to assess the type and frequency of sports and/or dance activities in which  
15 the adolescents took part. The second to eighth were used to assess the activity of the adolescents  
16 during physical education classes, recess, lunchtime, immediately after school, in the evenings, at  
17 the weekend and during leisure time. A five-point Likert scale 1 [lowest] to 5 [highest] was used  
18 for the second to eighth items. The ninth item was used to assess their physical activity frequency.  
19 The tenth item was used to gather information on any unusual activities that the adolescents  
20 undertook during those 7 days. The results obtained from the PAQ-C were categorised following  
21 Crocker et al (1997) into low (<2.33), moderate (2.33-3.66) and high (>3.66).<sup>41</sup>  
22  
23  
24  
25  
26  
27

### 28 **Anthropometric measures**

29

30 Body weight was measured by using a digital electronic weighing scale (Seca 813, Seca, UK) and  
31 recorded to the nearest 0.1 kg. Height was measured without socks and shoes by using a calibrated  
32 vertical stadiometer (Seca Portable 217, Seca, UK) and recorded to the nearest 0.1 cm. Body mass  
33 index was calculated as weight in kilograms divided by the square of height in metres. Waist  
34 circumference (midpoint between the lowest rib margin and the iliac crest) was measured by using  
35 a non-elastic measuring tape (Seca 201, Seca, UK) and recorded to the nearest 0.1 cm. Percentage  
36 body fat was measured by using a bioelectric impedance analyser (SC-240, Body Composition  
37 Analyser, Tanita Europe BV, The Netherlands).  
38  
39  
40  
41

### 42 **Sociodemographic measures**

43

44 Sociodemographic measures were collected via parental and student questionnaires which  
45 included questions on age, ethnicity and place of residency.  
46  
47  
48

### 49 **Statistical analyses**

50

51 Analyses were performed using the Statistical Package for Social Sciences software for Windows  
52 version 22.0 (IBM, Chicago, IL, USA) and the significance level was set at  $p < 0.05$ . The analyses  
53 were performed separately by gender. Normality and skewness tests were used to assess normal  
54 distribution. All variables showed a normal distribution, except for weight, waist circumference  
55 and BMI. Data was presented as means and standard deviations for normally distributed  
56  
57  
58  
59  
60

1  
2  
3 continuous variables, medians and interquartile ranges (IQRs) for non-normally distributed  
4 continuous variables and percentages for categorical variables. The independent t-test was used to  
5 examine gender differences for normally distributed variables and the Mann-Whitney U test was  
6 used for non-normally distributed variables. The association between hand grip strength and (i)  
7 energy intake, (ii) macronutrient intake and (iii) physical activity score was assessed by using  
8 Pearson's correlation coefficient. The hand grip strength of the dominant hand was entered as the  
9 dependent variable and (i) energy and macronutrient intake and (ii) physical activity score were  
10 entered as the independent variables while controlling for ethnicity, place of residency and BMI.  
11 Body mass index was chosen as the covariate despite there being several other indicators of obesity  
12 because BMI is able to discriminate body fatness in adolescents.<sup>42</sup> In addition, linear regression  
13 was used to investigate whether dietary intake and physical activity could predict hand grip  
14 strength when controlling for ethnicity, place of residency and BMI.  
15  
16  
17  
18  
19  
20

### 21 **Patient and public involvement**

22 This is a prospective adolescent cohort study from general population, therefore no patient  
23 involvement in this study. In this study, all eligible students were briefed on the purpose of the  
24 study, the benefits of the study and any potential harm for them. The individual results such as  
25 weight, height, waist and hip circumference and hand grip strength were recorded into individual  
26 health information leaflet and this information was given back to the students on the same day of  
27 data collection. Once other results on full blood counts, renal profile, fasting blood glucose and  
28 lipid profile returned to the investigators, the results were verified by a paediatrician and  
29 disseminated to the students' parents. Any of the results that went beyond the clinical reference  
30 ranges, the student and parents were informed and referred to either the nearest government clinic  
31 or University of Malaya's outpatient paediatric clinic for further treatment. Besides that, study  
32 findings will be disseminated through media interview, printed media and presentation to Ministry  
33 of Education and Ministry of Health, Malaysia.  
34  
35  
36  
37  
38  
39

## 40 **RESULTS**

### 41 **Descriptive analysis**

42 Table 1 provides the characteristics of the participants. It can be seen that males had significantly  
43 higher values than females in terms of weight, physical activity score, hand grip strength of both  
44 hands, and energy and carbohydrate intakes per day, but not in percentage body fat and BMI  
45 ( $p < 0.05$ ). About two thirds (69.2%) of the females had a low physical activity score, whereas  
46 almost two thirds of the males (65.2%) had a moderate to high physical activity score.  
47  
48  
49  
50  
51  
52

### 53 **Correlation and regression**

54 Table 2 illustrates the main result and the number of participants used for the analysis which was  
55 as described in Figure 1. A positive linear relationship was found between energy, carbohydrate,  
56  
57  
58  
59  
60



and fat intakes and physical activity score and the dependent variable hand grip strength ( $p < 0.01$ ) among males. Meanwhile, protein (g/kg body weight) was found to be negatively correlated with hand grip strength among males ( $p < 0.01$ ). However, no such correlation was found in females.

To investigate whether dietary intake and physical activity could predict hand grip strength, a linear regression was computed while controlling for ethnicity, place of residency and BMI. Before running the regressions, the assumptions of linearity, normally distributed errors and non-correlated errors were checked and met. Protein, carbohydrate and fat intakes were not used in the regression due to multicollinearity. When the physical activity score and energy intake were added, both variables significantly predicted hand grip strength:  $F(3, 391) = 26.318$ ,  $p < 0.001$ , adjusted  $R^2 = 0.162$  (Table 3). When physical factors (length of dominant hand span and height) were entered, the prediction improved with an adjusted  $R^2$  of 0.339.

**Table 1: Characteristics of MyHeART participants**

|                                           | Male<br>(n=395)       | Female<br>(n=617)     | All<br>(n=1012)       | <i>p</i> |
|-------------------------------------------|-----------------------|-----------------------|-----------------------|----------|
| <b>Age (y)</b>                            | 15.04 ( $\pm 0.198$ ) | 15.04 ( $\pm 0.205$ ) | 15.04 ( $\pm 0.202$ ) | 0.384    |
| <b>Ethnicity</b>                          |                       |                       |                       |          |
| Malay                                     | 307 (77.7%)           | 487 (78.9%)           | 795 (78.6%)           | 0.495    |
| Chinese                                   | 26 (6.6%)             | 47 (7.6%)             | 73 (7.2%)             |          |
| Indian                                    | 35 (8.9%)             | 54 (8.8%)             | 89 (8.8%)             |          |
| Others                                    | 27 (6.8%)             | 29 (4.7%)             | 56 (5.5%)             |          |
| <b>Place of residency</b>                 |                       |                       |                       |          |
| Urban                                     | 216 (54.7%)           | 367 (59.5%)           | 583 (57.6%)           | 0.132    |
| Rural                                     | 179 (45.3%)           | 250 (40.5%)           | 429 (42.4%)           |          |
| <b>Weight<sup>a</sup> (kg)</b>            | 51.00 (17.00)         | 48.50 (15.35)         | 49.50 (15.60)         | <0.001*  |
| <b>Height (cm)</b>                        | 163.20 ( $\pm 6.76$ ) | 154.65 ( $\pm 5.67$ ) | 157.99 ( $\pm 7.40$ ) | 0.052    |
| <b>BMI<sup>a</sup> (kg/m<sup>2</sup>)</b> | 18.90 (5.49)          | 20.25 (5.74)          | 19.74 (5.73)          | <0.001*  |



|                     |                    |             |             |             |         |
|---------------------|--------------------|-------------|-------------|-------------|---------|
| <b>BMI category</b> |                    |             |             |             | <0.001* |
|                     | <b>Underweight</b> | 86 (21.8%)  | 108 (17.5%) | 194 (19.2%) |         |
|                     | <b>Normal</b>      | 222 (56.2%) | 355 (57.5%) | 577 (57.0%) |         |
|                     | <b>Overweight</b>  | 51 (12.9%)  | 101 (16.4%) | 152 (15.0%) |         |
|                     | <b>Obesity</b>     | 36 (9.1%)   | 53 (8.6%)   | 89 (8.8%)   |         |

|                   |                |               |                |         |
|-------------------|----------------|---------------|----------------|---------|
| <b>% body fat</b> | 15.50 (±11.02) | 29.37 (±9.17) | 23.95 (±12.01) | <0.001* |
|-------------------|----------------|---------------|----------------|---------|

|                                             |               |               |               |       |
|---------------------------------------------|---------------|---------------|---------------|-------|
| <b>Waist circumference<sup>a</sup> (cm)</b> | 67.90 (15.50) | 69.00 (13.50) | 68.50 (14.00) | 0.514 |
|---------------------------------------------|---------------|---------------|---------------|-------|

Differences between male and female participants were determined using an independent t-test and the Mann-Whitney test. Data are presented as means ± standard deviation or as n (%), unless otherwise stated.

\*Statistically significant at  $p < 0.05$ .

<sup>a</sup>Values are expressed as medians (IQRs).

**Table 1: Characteristics of MyHeART participants (cont...)**

|                                                        | <b>Male<br/>(n=395)</b> | <b>Female<br/>(n=617)</b> | <b>All<br/>(n=1012)</b> | <b>p</b> |
|--------------------------------------------------------|-------------------------|---------------------------|-------------------------|----------|
| <b>Physical activity score</b>                         | 2.43 (±0.75)            | 2.12 (±0.54)              | 2.24 (±0.65)            | <0.001*  |
| <b>Physical activity level</b>                         |                         |                           |                         |          |
| low (<2.33)                                            | 177 (44.8%)             | 427 (69.2%)               | 604 (59.7%)             | <0.001*  |
| moderate (2.33-3.66)                                   | 199 (50.4%)             | 183 (29.7%)               | 382 (37.7%)             |          |
| high (>3.66)                                           | 19 (4.8%)               | 7 (1.1%)                  | 26 (2.6%)               |          |
| <b>Hand grip strength (kg)</b>                         |                         |                           |                         |          |
| Average hand grip strength<br>(dominant hand) (kg)     | 27.25 (±7.16)           | 18.73 (±4.63)             | 22.06 (±7.09)           | <0.001*  |
| Average hand grip strength<br>(non-dominant hand) (kg) | 25.77 (±7.34)           | 17.44 (±4.72)             | 20.69 (±7.15)           | <0.001*  |
| <b>Energy &amp; macronutrients<br/>intake</b>          |                         |                           |                         |          |
| Energy (kcal)                                          | 2047 (±583)             | 1738 (±474)               | 1858 (±540)             | 0.001*   |

|                  |                 |                 |                 |         |
|------------------|-----------------|-----------------|-----------------|---------|
| Protein (g)      | 75.69 (±22.48)  | 66.07 (±19.45)  | 69.82 (±21.20)  | 0.04*   |
| Protein (g/kg)   | 1.46 (±0.58)    | 1.35 (±0.53)    | 1.40 (±0.55)    | 0.168   |
| Carbohydrate (g) | 280.71 (±90.17) | 229.31 (±67.79) | 249.37 (±81.23) | <0.001* |
| Fat (g)          | 68.97 (±21.74)  | 61.60 (±20.13)  | 64.48 (±21.07)  | 0.16    |

Differences between male and female participants were determined using an independent t-test and the Mann-Whitney test. Data are presented as means ± standard deviation or as n (%), unless otherwise stated.

\*Statistically significant at  $p < 0.05$ .

<sup>a</sup>Values are expressed as medians (IQRs).

**Table 2: Partial correlation (r) between dietary intake, physical activity score and hand grip strength in adolescents**

|                                         | Hand grip strength for males*<br>(n = 395) |         | Hand grip strength for females*<br>(n = 617) |       |
|-----------------------------------------|--------------------------------------------|---------|----------------------------------------------|-------|
|                                         | r                                          | P       | r                                            | p     |
| <b>Energy and macronutrients intake</b> |                                            |         |                                              |       |
| Energy (kcal)                           | 0.140                                      | 0.006** | 0.018                                        | 0.651 |
| Protein (g/kg)                          | -0.134                                     | 0.008** | -0.021                                       | 0.610 |
| Carbohydrate (g)                        | 0.153                                      | 0.002** | 0.026                                        | 0.528 |
| Fat (g)                                 | 0.124                                      | 0.014** | -0.002                                       | 0.962 |
| <b>Physical activity score</b>          | 0.170                                      | 0.001** | 0.042                                        | 0.298 |

\*Controlled for ethnicity, place of residency and BMI

\*\*Statistically significant at  $p < 0.05$ .

**Table 3: Multiple linear regression model for male adolescents**

|                         | Hand grip strength of male<br>(n = 395) |       |        |
|-------------------------|-----------------------------------------|-------|--------|
|                         | R <sup>2</sup>                          | β     | p      |
| Energy intake (kcal)    | 0.162                                   | 0.143 | 0.002* |
| Physical activity score |                                         | 0.129 | 0.006* |

1  
2  
3 \*Controlled for ethnicity, place of residency and BMI  
4  
5  
6  
7  
8  
9  
10  
11  
12  
13  
14  
15  
16  
17  
18  
19  
20  
21  
22  
23

## 24 **DISCUSSION**

### 25 26 **Hand grip strength, dietary intake and physical activity**

27  
28 This study showed that the muscle strength of Malaysian adolescents is much lower than that of  
29 their counterparts as reported by studies in Europe (males: 35.9±9.3kg; females: 26.2±4.9kg), the  
30 United Kingdom (males: 25.7±kg; females: 21.8±5.8kg) and Colombia of South America (males:  
31 33.6±6.85kg; females: 24.9±4.29kg).<sup>2 15 43</sup> Also, according to the results, female adolescents in  
32 Malaysia have lower muscle strength than those in Beijing, China.<sup>44</sup> Unfortunately, there is no  
33 large population based Asian male adolescent data with which to compare with the results of the  
34 current study. Hence, this study can be considered the first documented muscle strength study  
35 among adolescents of both genders in Asia. Nevertheless, despite the lack of comparable studies,  
36 the trend for adolescents is similar to that reported for Malaysian adult population, where it was  
37 found the hand grip strength of Malaysian adults is 1.5 times lower than that of adults in Western  
38 countries.<sup>45</sup> Thus together with the findings of the current study, this may indicate that the muscle  
39 strength of the Malaysian population is relatively low from a young age. Indeed, the results of a  
40 longitudinal study conducted in Quebec, a province in eastern Canada, which tracked muscle  
41 strength from childhood to adulthood, suggested that low muscle strength can persist from  
42 childhood through adolescence and into adulthood.<sup>46</sup> Therefore, it seems worthwhile to detect low  
43 muscle strength at a young age and build it up in order to foster favourable health outcomes in  
44 later life.<sup>1</sup> Thus, it can be argued that low muscle strength among adolescents warrants particular  
45 attention in order to identify the root cause, especially if it is associated with dietary intake and  
46 physical activity which are both modifiable health-related behaviours.  
47  
48  
49  
50  
51  
52  
53

54 The results of this study also showed that there were differences in hand grip strength, dietary  
55 intake and physical activity score between male and female adolescents. Specifically, the males  
56  
57

1  
2  
3 had higher muscle strength, consumed more energy, protein and carbohydrate and were more  
4 physically active than their female counterparts. These findings are consistent with those of  
5 previous studies conducted on study populations aged 13 years-old.<sup>14 47 48</sup>  
6  
7  
8

### 9 **Association between dietary intake, physical activity and hand grip strength**

11 In this study, in males, energy, carbohydrate, and fat intakes and physical activity score were  
12 positively correlated with hand grip strength, but protein was negatively weak correlated (table 2).  
13 Although it has been shown that protein helps muscle protein synthesis and thus eventually  
14 improves muscle strength<sup>49</sup>, the effect of protein was not observed in this study. One possible  
15 explanation for this finding could be due to quality of protein consumed.<sup>50</sup> Often, dietary protein  
16 is ingested as a whole so it includes high biological value and low biological value and this leads  
17 to difficulty in identifying how proteins derived from animal and plant sources differ in their  
18 capacity to improve muscle mass and strength. Empirical studies have shown that at least 25 g of  
19 high quality proteins (including at least 8-10 g essential amino acids and higher leucine content)  
20 promote muscle protein synthesis and thus result in better muscle strength.<sup>49</sup> Therefore, the specific  
21 impact of high biological value protein is worth investigating in the future.  
22  
23  
24  
25  
26  
27

28 In addition, studies have also reported that energy plays a moderating role in muscle strength.<sup>22 23</sup>  
29 Although a study that used milk supplementation and resistance training as an intervention did not  
30 see an improvement in muscle mass, the researchers argued that energy plays a mediator role in  
31 the relationship between muscle mass, protein intake and resistance training despite the finding  
32 showing otherwise.<sup>23</sup> Therefore, a sufficient intake of energy and/or carbohydrate to meet the daily  
33 requirement is needed before protein can play a role in promoting muscle building and strength.  
34  
35  
36  
37

38 In the current study, when the energy intake per day and physical activity score were added into  
39 the model while controlling for BMI, both of these predictors remained significantly associated  
40 with hand grip strength. In addition, a higher energy intake and a higher physical activity score  
41 predicted a higher hand grip strength. Moreover, a higher BMI predicted a higher hand grip  
42 strength. The latter finding is consistent with that reported by a study on Southern Brazil  
43 adolescents, which found that the higher the BMI the greater the muscle strength.<sup>21</sup> Also, the  
44 researchers stated that their study population had a higher body mass, particularly muscle. As the  
45 current study did not include an objective measure for muscle mass, we considered body fat  
46 percentage and it was found that the male participants had a lower body fat percentage than the  
47 female participants. In addition, the average BMI of the (15-year-old) male participants was below  
48 the overweight level using International Obesity Task Force reference. Nevertheless, BMI is not  
49 generally regarded as a good indicator of body composition.<sup>51</sup> In this study, body fat percentage  
50 showed similar result after percentage body fat was used in the model to replace BMI. With that,  
51 the usage of BMI remained for easier comparison to other studies. On the other hand, there is a  
52 general consensus that the higher the body fat, especially abdominal fat, the lower the hand grip  
53  
54  
55  
56  
57  
58  
59  
60

1  
2  
3 strength.<sup>5</sup> This could be due to fat playing an inert role in muscle strength.<sup>52</sup> However, in contrast  
4 to the above-mentioned studies, a study conducted in Italy on a sample of 2411 adolescents  
5 produced a neutral result, implying that obesity does not affect muscle strength among healthy  
6 schoolchildren.<sup>53</sup> Nonetheless, the predictive equation used in the current study needs to be  
7 interpreted with caution as energy intake and physical activity only explain about 16.2% of the  
8 variation in muscle strength.  
9  
10

11  
12  
13 In this study, no relationship was found between dietary intake, physical activity score and hand  
14 grip strength among female adolescents. This result is similar to that reported in a study on  
15 adolescents in Europe<sup>15</sup>, which showed that proline (amino acids) is positively correlated with  
16 lower limb muscular strength but that, when carbohydrate intake is controlled for, this relationship  
17 disappears.<sup>15</sup> On the other hand, a study conducted among Kenya adolescents found that female  
18 adolescents have greater muscle strength than their male counterparts and suggested that thi was  
19 because the females undertake more household chores such as transferring water from deep wells  
20 and preparing meals, and thus have greater access to food than the males.<sup>54</sup> All such activities  
21 eventually help to build upper limb muscle strength. However, these conditions are not commonly  
22 found in Malaysia where most adolescents are school attendees. It is therefore postulated that the  
23 reason that female adolescents in this study had lower muscle strength than the males is because  
24 almost 70% of the females had a low physical activity score due to a predominantly sedentary  
25 lifestyle as compared to the males, 65% of whom had a moderate to high physical activity score.  
26 It has also been found by a previous study that females already have a lower physical activity score  
27 at an earlier age compared to males<sup>47</sup> and that this continues as they age.  
28  
29  
30  
31  
32  
33

34 Another possible reason for the significant result observed in males but not females could be due  
35 to changes with puberty stage, where the hand grip strength of males increases tremendously at  
36 this stage as compared to females. A study has reported that at 13 years old, the hand grip strength  
37 of males and females is 17.8 kg and 14.7 kg, respectively<sup>14</sup>. Greater muscle hypertrophy is  
38 commonly found in pre-adolescent males compared with females at the same growth stage because  
39 of increasing levels of circulating androgens in the males.<sup>55</sup> Moreover, it has also been found that  
40 muscle strength increases when a male reaches puberty, which it has been argued is related to the  
41 growth spurt due to the direct action of testosterone, which has a direct anabolic effect on muscle  
42 fibres.<sup>56</sup> In the population analysed in the current study, the majority (95%) of the males has  
43 reported that they had reached the puberty stage. Thus, in addition to the males being moderately  
44 to highly physically active, the presence of testosterone could explain the marked difference in  
45 muscle strength between the male and female participants.  
46  
47  
48  
49  
50  
51

52 Although a positive effect of protein on muscle strength was not seen in this study, it is still crucial  
53 to explore the effect of dietary protein as it is known to play a role in ensuring appropriate growth  
54 during adolescence.<sup>15</sup> Furthermore, muscle building only occurs when a person is physically  
55 active because such activity triggers the digestion and better absorption of amino acids,<sup>50 57</sup> which  
56  
57

1  
2  
3 eventually increases muscle strength. Moreover, it is crucial to ensure that energy and carbohydrate  
4 intake requirements are met before protein can even play a role in improving muscle strength. The  
5 above findings therefore indicate that there is a strong need to undertake a longitudinal study to  
6 explore whether changes in dietary intake have an impact on hand grip strength among adolescents,  
7 and such a study also needs to take into account the variables of physical activity and weight  
8 status.  
9  
10

11  
12  
13 It is also important to acknowledge that the type of physical activity can affect the hand grip  
14 strength. A cross-sectional study has suggested different types of physical activity influence hand  
15 grip strength and not the amount of time spent on physical activity.<sup>58</sup> Often, studies on muscle  
16 strength have included obesity parameters such as BMI and percentage body fat. Some of these  
17 studies have found that obese adolescents exhibit lower relative muscle strength to body mass as  
18 compared to their non-obese counterparts.<sup>6 52</sup> Some studies have found otherwise.<sup>8 53 59</sup> For  
19 instance, one such study reported that girls with normal BMI have a low hand grip strength as  
20 compared to overweight/obese girls,<sup>8</sup> and the author postulated that the overweight/obese females  
21 may have increased their muscle mass due to physical growth. However, this finding and  
22 postulation needs to be interpreted cautiously because BMI does not differentiate between fat mass  
23 and fat-free mass. Moreover, the finding of that study could be due to discrepancies when  
24 examining the absolute strength and muscle strength relative to muscle mass and muscle quality.  
25 Besides dietary and physical activity factors, the literature has also shown that physical factors  
26 such as height and length of hand span can influence hand grip strength.<sup>21 60 61</sup> Although assessing  
27 the influence of physical factors was not one of this study's objectives, physical factors were found  
28 to play a role in influencing hand grip strength.  
29  
30  
31  
32  
33  
34  
35

### 36 **Strengths and limitations**

37 This study has a number of strengths. Firstly, it was conducted using a large sample of adolescents.  
38 Secondly, it used the standard protocols for hand grip strength, dietary intake and physical activity  
39 assessment as well as data monitoring processes during data collection, data entry and data analysis  
40 in order to minimise the risk of bias. Moreover, to the best of the authors' knowledge, this study  
41 may be the first to investigate the association between hand grip strength, dietary intake and  
42 physical activity among adolescents in Asia. However, it should be noted that this study is  
43 somewhat limited because it was cross-sectional in design, so the presence or otherwise of a causal  
44 relationship could not be established. In addition, the sample covered a narrow age range. Also,  
45 several variables such as dietary intake, physical activity and maturity stages were collected via  
46 self-completed questionnaire, which may be a limitation due to the potential for misreporting.  
47 However, no method is without its limitations and this method was pilot tested on adolescents, it  
48 was expected that it would be a reasonable approach. First, seven-day dietary record seemed the  
49 most appropriate in view of adolescents' memory processing capability<sup>30</sup> and because other  
50 approaches such as indirect calorimetry were not possible in this population-based study. Second,  
51 the translated PAQ-C had previously been validated in a local setting.<sup>40</sup> Third, the self-reported  
52  
53  
54  
55  
56  
57  
58  
59  
60

1  
2  
3 puberty stage has been found to be reliable in a school-based survey with a weighted kappa  
4 coefficient of 0.68 for males and females.<sup>62</sup>  
5  
6  
7

## 8 **CONCLUSION**

9  
10 The findings of this study suggest that muscle strength is associated with energy intake and  
11 physical activity among males. However, this relationship was not found in females. This  
12 difference requires further investigation in order to gain better understanding of the issues affecting  
13 muscle strength so as to improve the provision of nutritional and physical activity strategies for  
14 the adolescent muscular health of both genders.  
15  
16  
17  
18  
19  
20  
21  
22  
23  
24  
25

## 26 **ABBREVIATIONS**

27  
28 **BMI**           Body Mass Index

29  
30 **IQR**           Interquartile range  
31  
32  
33

34 **Acknowledgments:** The authors would like to thank Associate Professor Dr. Mohd Nahar Azmi  
35 Mohamed, Professor Dr. Tin Tin Su and Dr. 'Abqariyah Binti Yahya for the support and guidance.  
36  
37  
38

39 **Contributors:** AK Ng, HA Majid and NN Hairi carried out the data analysis. AK Ng drafted the  
40 manuscript. HA Majid and MY Jalaludin contributed in the design of the study and data collection.  
41 All authors contributed to the final manuscript write up.  
42  
43  
44

45 **Funding:** This study was supported by funding received from the University Malaya's Research  
46 Programme (UMRP022A-14HTM) and Postgraduate Research Fund (PG026-2016A).  
47  
48  
49

50 **Competing interests:** None.  
51  
52  
53

54 **Ethical approval:** Ethics Committee of the University Malaya Medical Centre (MEC Ref. No.  
55 896.34).  
56  
57  
58



**Data availability statement:** All data relevant to the study are included in the article or uploaded as supplementary information.

## REFERENCES

1. Ortega FB, Silventoinen K, Tynelius P, et al. Muscular strength in male adolescents and premature death: cohort study of one million participants. *BMJ* 2012;345:e7279.
2. Cohen D, López-Jaramillo P, Fernández-Santos J, et al. Muscle strength is associated with lower diastolic blood pressure in schoolchildren. *Preventive medicine* 2017;95:1-6.
3. Steene-Johannessen J, Anderssen SA, Kolle E, et al. Low muscle fitness is associated with metabolic risk in youth. *Med Sci Sports Exerc* 2009;41(7):1361-7. doi: 10.1249/MSS.0b013e31819aaae5
4. Blakeley CE, Van Rompay MI, Schultz NS, et al. Relationship between muscle strength and dyslipidemia, serum 25 (OH) D, and weight status among diverse schoolchildren: a cross-sectional analysis. *BMC pediatrics* 2018;18(1):23.
5. Ruiz JR, Castro-Pinero J, Artero EG, et al. Predictive validity of health-related fitness in youth: a systematic review. *Br J Sports Med* 2009;43(12):909-23. doi: 10.1136/bjism.2008.056499
6. Thivel D, Ring-Dimitriou S, Weghuber D, et al. Muscle Strength and Fitness in Pediatric Obesity: a Systematic Review from the European Childhood Obesity Group. *Obes Facts* 2016;9(1):52-63. doi: 10.1159/000443687
7. Timpka S, Petersson IF, Zhou C, et al. Muscle strength in adolescent men and future musculoskeletal pain: a cohort study with 17 years of follow-up. *BMJ Open* 2013;3(5) doi: 10.1136/bmjopen-2013-002656
8. Silva DAS, Pelegrini A, Chula de Castro JA, et al. Low handgrip strength levels among adolescents in a city in Southern Brazil. *Journal of Bodywork & Movement Therapies* 2017 doi: <http://dx.doi.org/10.1016/j.jbmt.2017.03.004>
9. Cohen DD, Voss C, Taylor MJ, et al. Ten-year secular changes in muscular fitness in English children. *Acta Paediatr* 2011;100(10):e175-7. doi: 10.1111/j.1651-2227.2011.02318.x
10. Dos Santos FK, Prista A, Gomes TN, et al. Secular trends in physical fitness of Mozambican school-aged children and adolescents. *Am J Hum Biol* 2015;27(2):201-6. doi: 10.1002/ajhb.22638
11. Huotari PR, Nupponen H, Laakso L, et al. Secular trends in muscular fitness among Finnish adolescents. *Scand J Public Health* 2010;38(7):739-47. doi: 10.1177/1403494810384425

12. Silverman IW. The secular trend for grip strength in Canada and the United States. *J Sports Sci* 2011;29(6):599-606. doi: 10.1080/02640414.2010.547209
13. Otero J, Cohen DD, Herrera VM, et al. Sociodemographic factors related to handgrip strength in children and adolescents in a middle income country: The SALUS study. *Am J Hum Biol* 2016;29(1) doi: 10.1002/ajhb.22896
14. Majid HA, Noran H, Jalaludin MY, et al. Poster Communications ICD Granada 2016. 17th International Congress of Dietetics 2016. Granada, Spain: Spanish Journal of Human Nutrition and Dietetics, 2016.
15. Gracia-Marco L, Bel-Serrat S, Cuenca-Garcia M, et al. Amino acids intake and physical fitness among adolescents. *Amino Acids* 2017;49(6):1041-52. doi: 10.1007/s00726-017-2393-6
16. Anjum SN, Choudary P, Dimri R, et al. Comparative evaluation of grip and pinch strength in an Asian and European population. *Hand Therapy* 2012;17(1):11-14. doi: 10.1258/ht.2011.011023
17. Keats E, C., Aviva I. Rappaport, Reena Jain, et al. Diet and Eating Practices among Adolescent Girls in Low- and Middle-Income Countries: A Systemic Review. Arlington, VA: Strengthening Partnerships, Results, and Innovations in Nutrition Globally (SPRING) project., 2017.
18. World Health Organization W. Prevalence of insufficient physical activity 2018 [cited 2018 13/7/2018]. Available from: [http://www.who.int/gho/ncd/risk\\_factors/physical\\_activity\\_text/en/](http://www.who.int/gho/ncd/risk_factors/physical_activity_text/en/) accessed 13/7/2018 2018.
19. Martinez-Gomez D, Eisenmann JC, Gomez-Martinez S, et al. Associations of physical activity and fitness with adipocytokines in adolescents: the AFINOS Study. *Nutrition, Metabolism and Cardiovascular Diseases* 2012;22(3):252-59.
20. Agostinis-Sobrinho C, Abreu S, Moreira C, et al. Muscular fitness, adherence to the Southern European Atlantic Diet and cardiometabolic risk factors in adolescents. *Nutr Metab Cardiovasc Dis* 2017;27(8):695-702. doi: 10.1016/j.numecd.2017.04.008 [published Online First: 2017/07/04]
21. Silva DAS, Martins PC. Impact of physical growth, body adiposity and lifestyle on muscular strength and cardiorespiratory fitness of adolescents. *Journal of Bodywork and Movement Therapies* 2017 doi: 10.1016/j.jbmt.2017.01.007
22. Kulkarni B, Kuper H, Radhakrishna KV, et al. The association of early life supplemental nutrition with lean body mass and grip strength in adulthood: evidence from APCAPS. *Am J Epidemiol* 2014;179(6):700-9. doi: 10.1093/aje/kwt332
23. Lambourne K, Washburn R, Lee J, et al. A 6-month trial of resistance training with milk supplementation in adolescents: effects on body composition. *International journal of sport nutrition and exercise metabolism* 2013;23(4):344-56.
24. Argilés JM, Campos N, Lopez-Pedrosa JM, et al. Skeletal muscle regulates metabolism via interorgan crosstalk: roles in health and disease. *Journal of the American Medical Directors Association* 2016;17(9):789-96.
25. Otero J, Cohen DD, Herrera VM, et al. Sociodemographic factors related to handgrip strength in children and adolescents in a middle income country: The SALUS study. *Am J Hum Biol* 2017;29(1) doi: 10.1002/ajhb.22896 [published Online First: 2016/07/19]
26. Hazreen MA, Su TT, Jalaludin MY, et al. An exploratory study on risk factors for chronic non-communicable diseases among adolescents in Malaysia: overview of the Malaysian Health and Adolescents Longitudinal Research Team study (The MyHeART study). *BMC Public Health* 2014;14 Suppl 3:S6. doi: 10.1186/1471-2458-14-S3-S6
27. Wind AE, Takken T, Helder PJ, et al. Is grip strength a predictor for total muscle strength in healthy children, adolescents, and young adults? *Eur J Pediatr* 2010;169(3):281-7. doi: 10.1007/s00431-009-1010-4

- 1
- 2
- 3
- 4 28. Pillsbury L, Oria M, Pate R. Fitness measures and health outcomes in youth: National Academies Press 2013.
- 5
- 6 29. Malaysian Health and Adolescents Longitudinal Research Team (MyHeART) Study Handbook. Kuala Lumpur: University of Malaya Press 2019.
- 7
- 8 30. Burrows TL, Martin RJ, Collins CE. A systematic review of the validity of dietary assessment methods in children when compared with the method of doubly labeled water. *J Am Diet Assoc* 2010;110(10):1501-10. doi: 10.1016/j.jada.2010.07.008
- 9
- 10 31. Willett W. Nutritional epidemiology: Oxford University Press 2012.
- 11 32. Livingstone MB, Prentice AM, Coward WA, et al. Validation of estimates of energy intake by weighed dietary record and diet history in children and adolescents. *The American journal of clinical nutrition* 1992;56(1):29-35.
- 12
- 13 33. Livingstone MBE, Robson PJ, Wallace JMW. Issues in dietary intake assessment of children and adolescents. *British Journal of Nutrition* 2004;92(S2):S213-S22.
- 14
- 15 34. Tee ES, Noor MI, Azudin MN, et al. The Nutrient Composition of Malaysian Food (4th edition)1997.
- 16 35. Day S, Fayers P, Harvey D. Double Data Entry: What Value, What Price? *Controlled Clinical Trials* 1998;19(1):15-24. doi: [https://doi.org/10.1016/S0197-2456\(97\)00096-2](https://doi.org/10.1016/S0197-2456(97)00096-2)
- 17 36. Berkey CS, Rockett HR, Field AE, et al. Activity, dietary intake, and weight changes in a longitudinal study of preadolescent and adolescent boys and girls. *Pediatrics* 2000;105(4):e56-e56.
- 18 37. Kowalski KC, Crocker PR, Faulkner RA. Validation of the physical activity questionnaire for older children. *Pediatric exercise science* 1997;9(2):174-86.
- 19 38. Dan S, Mohd N, Zalilah M. Determination of factors associated with physical activity levels among adolescents attending school in Kuantan, Malaysia. *Malays J Nutr* 2011;17(2):175-817.
- 20 39. Nor Aini J, Poh BK, Chee WSS. Validity of a children's physical activity questionnaire (cPAQ) for the study of bone health. *Pediatrics International* 2013;55(2):223-28.
- 21 40. Dan S, Zalilah M. Sex and ethnic differentials in physical activity levels of adolescents in Kuantan. *Malaysian journal of nutrition* 2007;13(2):109-20.
- 22 41. Crocker P, Bailey DA, Faulkner RA, et al. Measuring general levels of physical activity: preliminary evidence for the Physical Activity Questionnaire for Older Children. *Medicine and science in sports and exercise* 1997;29(10):1344-49.
- 23 42. Pelegrini A, Silva DAS, de Lima Silva JMF, et al. Anthropometric indicators of obesity in the prediction of high body fat in adolescents. *Revista Paulista de Pediatria (English Edition)* 2015;33(1):56-62. doi: [https://doi.org/10.1016/S2359-3482\(15\)30031-2](https://doi.org/10.1016/S2359-3482(15)30031-2)
- 24 43. Sandercock GR, Lobelo F, Correa-Bautista JE, et al. The relationship between socioeconomic status, family income, and measures of muscular and cardiorespiratory fitness in Colombian schoolchildren. *The Journal of pediatrics* 2017;185:81-87. e2.
- 25 44. Foo LH, Zhang Q, Zhu K, et al. Low vitamin D status has an adverse influence on bone mass, bone turnover, and muscle strength in Chinese adolescent girls. *J Nutr* 2009;139(5):1002-7. doi: 10.3945/jn.108.102053
- 26 45. Kamarul T, Ahmad TS, Loh W. Hand grip strength in the adult Malaysian population. *Journal of Orthopaedic Surgery* 2006;14(2):172-77.
- 27 46. Trudeau F, Shephard RJ, Arsenault F, et al. Tracking of physical fitness from childhood to adulthood. *Canadian Journal of Applied Physiology* 2003;28(2):257-71.
- 28 47. Su TT, Sim PY, Nahar AM, et al. Association between self-reported physical activity and indicators of body composition in Malaysian adolescents. *Prev Med* 2014;67:100-5. doi: 10.1016/j.ypmed.2014.07.001
- 29 48. Majid HA, Ramli L, Ying SP, et al. Dietary Intake among Adolescents in a Middle-Income Country: An Outcome from the Malaysian Health and Adolescents Longitudinal Research Team Study (the MyHeARTs Study). *PLoS One* 2016;11(5):e0155447. doi: 10.1371/journal.pone.0155447
- 30
- 31
- 32
- 33
- 34
- 35
- 36
- 37
- 38
- 39
- 40
- 41
- 42
- 43
- 44
- 45
- 46
- 47
- 48
- 49
- 50
- 51
- 52
- 53
- 54
- 55
- 56
- 57
- 58
- 59
- 60

- 1  
2  
3 49. Breen L, Phillips SM. Interactions between exercise and nutrition to prevent muscle waste during  
4 ageing. *Br J Clin Pharmacol* 2013;75(3):708-15. doi: 10.1111/j.1365-2125.2012.04456.x  
5  
6 50. Strasser B, Volaklis K, Fuchs D, et al. Role of Dietary Protein and Muscular Fitness on Longevity and  
7 Aging. *Aging and Disease* 2018;9(1):119-32. doi: 10.14336/AD.2017.0202  
8  
9 51. Freedman DS, Sherry B. The validity of BMI as an indicator of body fatness and risk among children.  
10 *Pediatrics* 2009;124(Supplement 1):S23-S34.  
11  
12 52. Tomlinson DJ, Erskine RM, Morse CI, et al. The impact of obesity on skeletal muscle strength and  
13 structure through adolescence to old age. *Biogerontology* 2016;17(3):467-83. doi:  
14 10.1007/s10522-015-9626-4  
15  
16 53. Ceschia A, Giacomini S, Santarossa S, et al. Deleterious effects of obesity on physical fitness in pre-  
17 pubertal children. *European Journal of Sport Science* 2015;16:1-8. doi:  
18 10.1080/17461391.2015.1030454  
19  
20 54. Little MA. Grip strength and body composition in Turkana pastoralist children and adolescents.  
21 *American Journal of Human Biology* 2017;29(2):e22922. doi: doi:10.1002/ajhb.22922  
22  
23 55. Faigenbaum AD, Kraemer WJ, Blimkie CJ, et al. Youth resistance training: updated position statement  
24 paper from the national strength and conditioning association. *The Journal of Strength &*  
25 *Conditioning Research* 2009;23:S60-S79.  
26  
27 56. McComas A, Sica R, Petito F. Muscle strength in boys of different ages. *Journal of Neurology,*  
28 *Neurosurgery & Psychiatry* 1973;36(2):171-73.  
29  
30 57. Wu G. Dietary protein intake and human health. *Food & function* 2016;7(3):1251-65.  
31  
32 58. Mattioli RÁ, Cavalli AS, Ribeiro JAB, et al. Association between handgrip strength and physical  
33 activity in hypertensive elderly individuals. *Revista Brasileira de Geriatria e Gerontologia*  
34 2015;18(4):881-91.  
35  
36 59. Ravisankar P, Udupa K, Prakash ES. Correlation between body mass index and blood pressure  
37 indices, handgrip strength and handgrip endurance in underweight, normal weight and  
38 overweight adolescents. *Indian journal of physiology and pharmacology* 2005;49(4):455.  
39  
40 60. Ploegmakers JJ, Hepping AM, Geertzen JH, et al. Grip strength is strongly associated with height,  
41 weight and gender in childhood: a cross sectional study of 2241 children and adolescents  
42 providing reference values. *Journal of physiotherapy* 2013;59(4):255-61.  
43  
44 61. Jurimae T, Hurbo T, Jurimae J. Relationship of handgrip strength with anthropometric and body  
45 composition variables in prepubertal children. *Homo* 2009;60(3):225-38. doi:  
46 10.1016/j.jchb.2008.05.004  
47  
48 62. Jaruratanasirikul S, Kreetapirom P, Tassanakijpanich N, et al. Reliability of pubertal maturation self-  
49 assessment in a school-based survey. *Journal of Pediatric Endocrinology and Metabolism,*  
50 2015:367.  
51  
52  
53  
54  
55  
56  
57  
58  
59  
60

1  
2  
3  
4  
5  
6  
7  
8  
9  
10  
11  
12  
13  
14  
15  
16  
17  
18  
19  
20  
21  
22  
23  
24  
25  
26  
27  
28  
29  
30  
31  
32  
33  
34  
35  
36  
37  
38  
39  
40  
41  
42  
43  
44  
45  
46  
47  
48  
49  
50  
51  
52  
53  
54  
55  
56  
57  
58  
59  
60

For peer review only

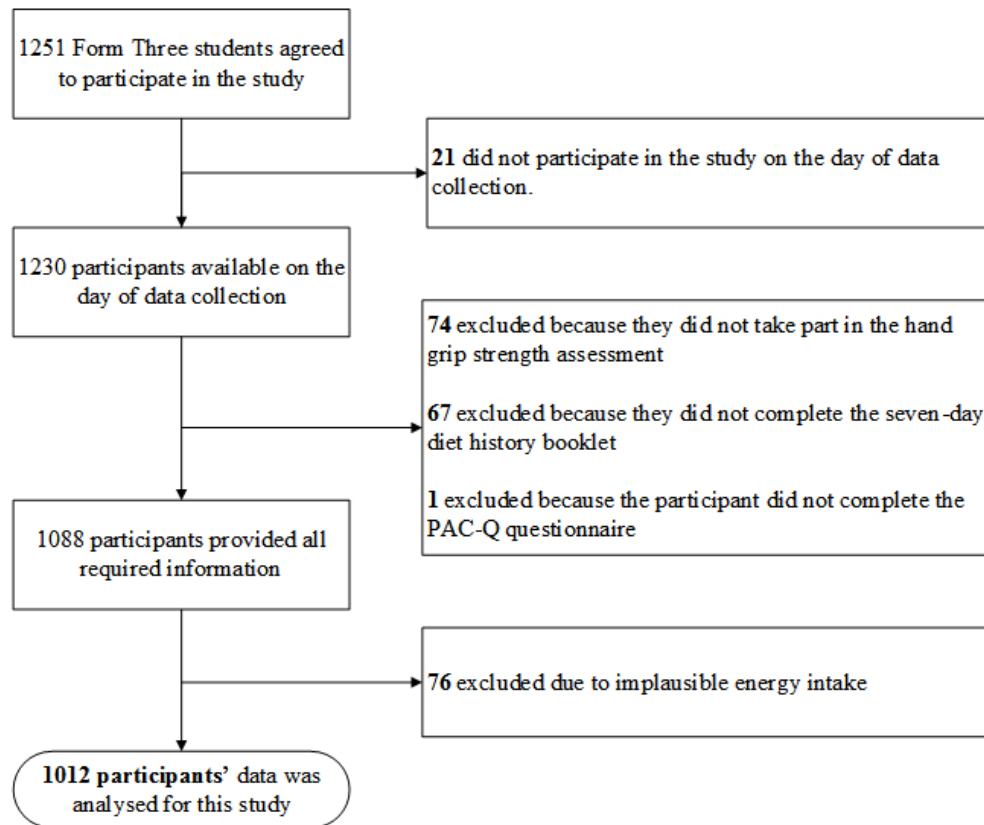

Flowchart of the participant sampling procedure

173x143mm (96 x 96 DPI)

**STROBE 2007 (v4) checklist of items to be included in reports of observational studies in epidemiology\***  
**Checklist for cohort, case-control, and cross-sectional studies (combined)**

| Section/Topic             | Item # | Recommendation                                                                                                                                                                                                                                                                                                                                                                                                                                                         | Reported on page # |
|---------------------------|--------|------------------------------------------------------------------------------------------------------------------------------------------------------------------------------------------------------------------------------------------------------------------------------------------------------------------------------------------------------------------------------------------------------------------------------------------------------------------------|--------------------|
| Title and abstract        | 1      | (a) Indicate the study's design with a commonly used term in the title or the abstract                                                                                                                                                                                                                                                                                                                                                                                 | 1                  |
|                           |        | (b) Provide in the abstract an informative and balanced summary of what was done and what was found                                                                                                                                                                                                                                                                                                                                                                    | 1                  |
| <b>Introduction</b>       |        |                                                                                                                                                                                                                                                                                                                                                                                                                                                                        |                    |
| Background/rationale      | 2      | Explain the scientific background and rationale for the investigation being reported                                                                                                                                                                                                                                                                                                                                                                                   | 3                  |
| Objectives                | 3      | State specific objectives, including any pre-specified hypotheses                                                                                                                                                                                                                                                                                                                                                                                                      | 3                  |
| <b>Methods</b>            |        |                                                                                                                                                                                                                                                                                                                                                                                                                                                                        |                    |
| Study design              | 4      | Present key elements of study design early in the paper                                                                                                                                                                                                                                                                                                                                                                                                                | 4                  |
| Setting                   | 5      | Describe the setting, locations, and relevant dates, including periods of recruitment, exposure, follow-up, and data collection                                                                                                                                                                                                                                                                                                                                        | 4                  |
| Participants              | 6      | (a) <i>Cohort study</i> —Give the eligibility criteria, and the sources and methods of selection of participants. Describe methods of follow-up<br><i>Case-control study</i> —Give the eligibility criteria, and the sources and methods of case ascertainment and control selection. Give the rationale for the choice of cases and controls<br><i>Cross-sectional study</i> —Give the eligibility criteria, and the sources and methods of selection of participants | 4                  |
|                           |        | (b) <i>Cohort study</i> —For matched studies, give matching criteria and number of exposed and unexposed<br><i>Case-control study</i> —For matched studies, give matching criteria and the number of controls per case                                                                                                                                                                                                                                                 | Not applicable     |
| Variables                 | 7      | Clearly define all outcomes, exposures, predictors, potential confounders, and effect modifiers. Give diagnostic criteria, if applicable                                                                                                                                                                                                                                                                                                                               | 4-5                |
| Data sources/ measurement | 8*     | For each variable of interest, give sources of data and details of methods of assessment (measurement). Describe comparability of assessment methods if there is more than one group                                                                                                                                                                                                                                                                                   | 4-5                |
| Bias                      | 9      | Describe any efforts to address potential sources of bias                                                                                                                                                                                                                                                                                                                                                                                                              | Not applicable     |
| Study size                | 10     | Explain how the study size was arrived at                                                                                                                                                                                                                                                                                                                                                                                                                              | 4                  |
| Quantitative variables    | 11     | Explain how quantitative variables were handled in the analyses. If applicable, describe which groupings were chosen and why                                                                                                                                                                                                                                                                                                                                           | 6                  |
| Statistical methods       | 12     | (a) Describe all statistical methods, including those used to control for confounding                                                                                                                                                                                                                                                                                                                                                                                  | 6                  |
|                           |        | (b) Describe any methods used to examine subgroups and interactions                                                                                                                                                                                                                                                                                                                                                                                                    | 6                  |
|                           |        | (c) Explain how missing data were addressed                                                                                                                                                                                                                                                                                                                                                                                                                            | Not applicable     |
|                           |        | (d) <i>Cohort study</i> —If applicable, explain how loss to follow-up was addressed<br><i>Case-control study</i> —If applicable, explain how matching of cases and controls was addressed                                                                                                                                                                                                                                                                              | Not applicable     |



|                          |     |                                                                                                                                                                                                              |                |
|--------------------------|-----|--------------------------------------------------------------------------------------------------------------------------------------------------------------------------------------------------------------|----------------|
|                          |     | <i>Cross-sectional study</i> —If applicable, describe analytical methods taking account of sampling strategy                                                                                                 |                |
|                          |     | (e) Describe any sensitivity analyses                                                                                                                                                                        | Not applicable |
| <b>Results</b>           |     |                                                                                                                                                                                                              |                |
| Participants             | 13* | (a) Report numbers of individuals at each stage of study—eg numbers potentially eligible, examined for eligibility, confirmed eligible, included in the study, completing follow-up, and analysed            | 6              |
|                          |     | (b) Give reasons for non-participation at each stage                                                                                                                                                         | 6              |
|                          |     | (c) Consider use of a flow diagram                                                                                                                                                                           | Not applicable |
| Descriptive data         | 14* | (a) Give characteristics of study participants (eg demographic, clinical, social) and information on exposures and potential confounders                                                                     | 6, 8-9         |
|                          |     | (b) Indicate number of participants with missing data for each variable of interest                                                                                                                          | 6              |
|                          |     | (c) <i>Cohort study</i> —Summarise follow-up time (eg, average and total amount)                                                                                                                             | Not applicable |
| Outcome data             | 15* | <i>Cohort study</i> —Report numbers of outcome events or summary measures over time                                                                                                                          | Not applicable |
|                          |     | <i>Case-control study</i> —Report numbers in each exposure category, or summary measures of exposure                                                                                                         | Not applicable |
|                          |     | <i>Cross-sectional study</i> —Report numbers of outcome events or summary measures                                                                                                                           | Not applicable |
| Main results             | 16  | (a) Give unadjusted estimates and, if applicable, confounder-adjusted estimates and their precision (eg, 95% confidence interval). Make clear which confounders were adjusted for and why they were included | 6-7, 10        |
|                          |     | (b) Report category boundaries when continuous variables were categorized                                                                                                                                    | Not applicable |
|                          |     | (c) If relevant, consider translating estimates of relative risk into absolute risk for a meaningful time period                                                                                             | Not applicable |
| Other analyses           | 17  | Report other analyses done—eg analyses of subgroups and interactions, and sensitivity analyses                                                                                                               | Not applicable |
| <b>Discussion</b>        |     |                                                                                                                                                                                                              |                |
| Key results              | 18  | Summarise key results with reference to study objectives                                                                                                                                                     | 11-13          |
| Limitations              | 19  | Discuss limitations of the study, taking into account sources of potential bias or imprecision. Discuss both direction and magnitude of any potential bias                                                   | 13             |
| Interpretation           | 20  | Give a cautious overall interpretation of results considering objectives, limitations, multiplicity of analyses, results from similar studies, and other relevant evidence                                   | 13             |
| Generalisability         | 21  | Discuss the generalisability (external validity) of the study results                                                                                                                                        | 13             |
| <b>Other information</b> |     |                                                                                                                                                                                                              |                |
| Funding                  | 22  | Give the source of funding and the role of the funders for the present study and, if applicable, for the original study on which the present article is based                                                | 14             |

\*Give information separately for cases and controls in case-control studies and, if applicable, for exposed and unexposed groups in cohort and cross-sectional studies.

**Note:** An Explanation and Elaboration article discusses each checklist item and gives methodological background and published examples of transparent reporting. The STROBE checklist is best used in conjunction with this article (freely available on the Web sites of PLoS Medicine at <http://www.plosmedicine.org/>, Annals of Internal Medicine at <http://www.annals.org/>, and Epidemiology at <http://www.epidem.com/>). Information on the STROBE Initiative is available at [www.strobe-statement.org](http://www.strobe-statement.org).
